# Supplementary material for: Exploring sequence- and structure-based fitness landscapes to enhance thermal resistance and activity of endoglucanase II with minimal experimental effort
Source: RSC Chem Biol. 2025 May 5;6(6):975–86. doi: 10.1039/d5cb00013k (PMC12080268; doi:10.1039/d5cb00013k)
Supplement: CB-006-D5CB00013K-s001 [file CB-006-D5CB00013K-s001.xlsx]

## Sheet: Sheet1
Predicted EGLII variants	ΔE
V226I/Q289G	5.82649
P111I/Q289G	5.46567
D164A/Q289G	5.40619
A178S/Q289G	5.22777
P111I/V226I	5.12157
D164A/V226I	5.02806
P111I/D164A	4.84709
P111V/Q289G	4.80529
A178S/V226I	4.55183
P111I/A178S	4.48847
T110N/Q289G	4.43384
S180T/Q289G	4.42983
V226I/Q289A	4.36623
Q289G/N299S	4.35271
D164A/A178S	4.30846
P111V/V226I	4.25889
E81A/Q289G	4.18991
P111I/Q289A	4.14964
T236Q/Q289G	4.10268
D164G/Q289G	4.09389
S123T/Q289G	4.05188
P111V/D164A	4.04173
V150L/Q289G	4.00942
V226I/N299S	3.96884
T110N/V226I	3.94868
D164A/Q289A	3.94726
L201K/Q289G	3.91792
A153D/Q289G	3.89205
S123K/Q289G	3.88056
S180T/V226I	3.87473
T236A/Q289G	3.84646
Q239K/Q289G	3.83503
Y188V/Q289G	3.822
T44S/Q289G	3.80327
T110N/P111I	3.78639
D164G/V226I	3.71255
S283A/Q289G	3.70729
E263T/Q289G	3.70282
T39I/Q289G	3.68715
Q289G/S305Y	3.66479
G92S/Q289G	3.66197
A178S/Q289A	3.65105
P111I/S180T	3.62707
P111V/A178S	3.6264
V226I/T236Q	3.60911
E81A/V226I	3.60729
P111I/N299S	3.54719
D164A/N299S	3.53293
V150L/V226I	3.51935
T110N/D164A	3.50163
D164A/S180T	3.49418
D164S/Q289G	3.47887
E81K/Q289G	3.47654
Q220T/Q289G	3.47591
E81Q/Q289G	3.47529
Y188V/V226I	3.45874
E81A/D164A	3.4427
P111I/D164G	3.41641
P111I/V150L	3.41432
A153D/V226I	3.40885
S123T/V226I	3.37998
E81A/P111I	3.37688
A191N/Q289G	3.36334
A178S/N299S	3.34148
I48T/Q289G	3.3319
P111V/Q289A	3.32876
L201K/V226I	3.32389
T44S/V226I	3.32309
V226I/E263T	3.32085
Y188T/Q289G	3.30487
V226I/T236A	3.27975
P111I/T236Q	3.27511
V150L/D164A	3.27215
D164A/T236Q	3.26813
P111I/Q239K	3.24753
P111I/A153D	3.24537
T110A/Q289G	3.23015
S123T/D164A	3.22444
V226I/Q239K	3.21612
T110N/A178S	3.20148
S131D/Q289G	3.20099
D164A/Y188V	3.19825
T77S/Q289G	3.19573
A78T/Q289G	3.1939
G92S/V226I	3.19025
P111I/L201K	3.18396
P111I/Y188V	3.18107
T39I/V226I	3.17422
S123K/V226I	3.17058
S240D/Q289G	3.16747
E81D/Q289G	3.16047
T190D/Q289G	3.1561
A178S/S180T	3.15446
E81G/Q289G	3.15414
E81A/A178S	3.1345
P111I/S123T	3.12872
T44S/P111I	3.10563
P111I/S283A	3.10387
P111I/T236A	3.09331
V226I/S305Y	3.09112
A153N/Q289G	3.0823
A153S/Q289G	3.0713
S240E/Q289G	3.06592
D164A/L201K	3.0586
D164A/Q239K	3.04305
H96Y/Q289G	3.03674
D164A/T236A	3.03535
T110S/Q289G	3.03224
Q289G/Y293F	3.02461
E14Q/Q289G	3.02086
K130A/Q289G	3.01894
Q289G/N299T	3.00901
I67V/Q289G	3.00833
P111I/E263T	3.00524
V193K/Q289G	3.00023
V232A/Q289G	2.99235
D164G/A178S	2.98987
V226I/S283A	2.98743
G92S/D164A	2.98014
L244K/Q289G	2.97486
V99I/Q289G	2.97397
P111V/N299S	2.95252
P111I/S123K	2.94691
T110N/P111V	2.9449
E34L/Q289G	2.94246
D164S/V226I	2.94244
G92S/P111I	2.94034
S240A/Q289G	2.93462
Q220T/V226I	2.91267
S180T/Q289A	2.91213
V193A/Q289G	2.91202
T39I/P111I	2.90239
Y188T/V226I	2.90155
T110N/Q289A	2.8963
T44S/D164A	2.88935
D164A/E263T	2.8841
E263K/Q289G	2.88186
E81Q/V226I	2.87727
A178S/T236Q	2.87711
P111I/S305Y	2.87536
D164A/S283A	2.86681
P111V/S180T	2.86328
S123K/D164A	2.86313
E81K/V226I	2.86001
I48T/V226I	2.85581
Q289A/N299S	2.8557
V150L/A178S	2.83369
A153D/D164A	2.83107
V226I/Q289P	2.83073
V226I/Q289D	2.82853
E148Q/Q289G	2.82279
T69N/Q289G	2.81894
P111I/Q220T	2.81855
A191N/V226I	2.81793
D164A/S305Y	2.81536
P111L/Q289G	2.81162
A178S/Y188V	2.8054
Q239R/Q289G	2.80139
A78T/V226I	2.79825
T39I/D164A	2.79564
L134K/Q289G	2.77379
T110A/V226I	2.77282
S12G/Q289G	2.76206
P111I/A191N	2.75064
S123T/A178S	2.74549
E81A/P111V	2.74056
P111I/D164S	2.73948
S280L/Q289G	2.73874
E81N/Q289G	2.73699
A178S/L201K	2.73472
Y188S/Q289G	2.72956
T77S/V226I	2.72051
A178S/T236A	2.72047
P111I/Y188T	2.72017
T110E/Q289G	2.71233
A178S/Q239K	2.71143
P111T/Q289G	2.71036
S131D/V226I	2.70453
D164A/Y188T	2.70421
E81K/P111I	2.69719
A153D/A178S	2.69652
A178S/E263T	2.69144
E81A/Q289A	2.6866
T236Q/Q289A	2.68568
E81Q/P111I	2.68268
P111V/V150L	2.67973
L125V/Q289G	2.6794
D164G/Q289A	2.67886
V232E/Q289G	2.67723
I48T/P111I	2.67462
E260T/Q289G	2.67335
P111V/D164G	2.67017
E260S/Q289G	2.66931
V226I/Y293F	2.66539
V226I/Q289S	2.66075
V152L/Q289G	2.65749
Q289G/S308P	2.64535
T120A/Q289G	2.64469
V99I/V226I	2.63757
V226I/N299T	2.63171
I67V/V226I	2.63032
P111I/Q289P	2.61977
P111I/Q289D	2.61769
G92S/A178S	2.61667
F80L/Q289G	2.61086
A153N/V226I	2.60232
E14R/Q289G	2.60077
D164A/Q220T	2.59655
K130A/V226I	2.5958
Q220D/Q289G	2.59405
T77A/Q289G	2.59388
E14Q/V226I	2.59068
S113T/Q289G	2.59025
E81D/V226I	2.58425
V226I/S240D	2.58424
E271Q/Q289G	2.5829
S240Q/Q289G	2.57656
V226I/S240E	2.57474
D164A/A191N	2.57359
V193K/V226I	2.57126
V150L/Q289A	2.56239
E81Q/D164A	2.56215
P111I/S240D	2.55684
T110S/V226I	2.55133
P111I/S131D	2.54995
T190D/V226I	2.54561
D200N/Q289G	2.53873
P111I/T190D	2.53785
T77S/P111I	2.53745
V226I/V232A	2.53744
Q289G/S305G	2.53212
P111V/T236Q	2.52682
P111V/Q239K	2.5224
S123K/A178S	2.5221
A78T/P111I	2.52007
E85T/Q289G	2.51747
I48T/D164A	2.51707
T110A/P111I	2.50735
T236E/Q289G	2.49687
Q289G/S305N	2.49302
T44S/A178S	2.49145
F104Y/Q289G	2.48939
T39I/A178S	2.48167
G242N/Q289G	2.47953
E81K/D164A	2.4786
T110N/N299S	2.47615
P111I/Q289S	2.46535
A153S/V226I	2.46493
P111V/S123T	2.46482
E81A/S180T	2.46436
S123T/Q289A	2.46417
P111I/A153N	2.46296
A153E/Q289G	2.45884
E81G/V226I	2.457
T69N/V226I	2.45371
V193A/V226I	2.45346
A52K/Q289G	2.4464
E271D/Q289G	2.44448
P111I/V193K	2.44345
P111V/T236A	2.43549
T110A/D164A	2.43467
D164A/Q289D	2.43387
V99I/P111I	2.4336
P111V/A153D	2.42671
V203I/Q289G	2.42556
V226I/S240A	2.42471
A178S/S305Y	2.42458
E81D/P111I	2.421
E34L/V226I	2.41032
T110N/S180T	2.40841
D164A/Q289P	2.40818
D164A/S240D	2.40497
Y188V/Q289A	2.39977
A52Q/Q289G	2.38868
P111I/N299T	2.38807
P111I/K130A	2.3847
A178S/S283A	2.38355
G92D/Q289G	2.3835
Y83L/Q289G	2.38123
V226I/L244K	2.37909
S180T/T236Q	2.37437
P111V/Y188V	2.37164
A78T/D164A	2.3672
P111V/L201K	2.36299
H96Y/V226I	2.36293
P111V/S123K	2.36149
E148Q/V226I	2.36119
V226I/E263K	2.36072
V193G/Q289G	2.35821
T44S/P111V	2.35788
T77S/D164A	2.35712
L134K/V226I	2.35538
P111L/V226I	2.34932
Q239K/Q289A	2.34336
T110E/V226I	2.34332
E81K/A178S	2.34096
S131D/D164A	2.34074
K130A/D164A	2.33951
D164A/T190D	2.33908
P111I/A153S	2.33672
A153D/Q289A	2.33624
D160N/Q289G	2.33589
E14K/Q289G	2.33571
T236A/Q289A	2.33542
Y188S/V226I	2.33117
P111V/E263T	2.33064
E81Q/A178S	2.32729
P111I/Y293F	2.32569
I67V/P111I	2.32493
G82D/Q289G	2.32397
D164A/N299T	2.32377
P111T/V226I	2.32323
P111I/S240E	2.31746
D164G/S180T	2.3149
H96Y/P111I	2.31299
E81A/T110N	2.30786
D233S/Q289G	2.30748
P111I/E263K	2.30557
V226I/Q239R	2.30235
E81S/Q289G	2.30123
T110S/P111I	2.29863
G92S/P111V	2.29648
D233A/Q289G	2.29301
S283A/Q289A	2.29295
E81G/P111I	2.28933
P111I/Q239R	2.28837
D164A/Y293F	2.28549
D164A/S240E	2.28457
A178S/A191N	2.28423
H96Y/D164A	2.28412
V98I/Q289G	2.28155
E81D/D164A	2.28151
S123K/Q289A	2.28083
V99I/D164A	2.27959
D164A/S240A	2.2794
E14Q/P111I	2.27321
S18V/Q289G	2.26972
T110N/D164G	2.26789
A178Q/Q289G	2.2634
S180T/N299S	2.26199
D164G/N299S	2.26033
L201K/Q289A	2.25758
D164S/A178S	2.25683
I48T/A178S	2.25468
S12G/V226I	2.25038
T44S/Q289A	2.24635
Q289G/S305Q	2.24565
V226I/S280L	2.24235
G92S/Q289A	2.23956
E263T/Q289A	2.23837
E271A/Q289G	2.23401
M66L/Q289G	2.23183
K93A/Q289G	2.23027
P111V/S283A	2.22998
T39I/P111V	2.22772
D164A/Q289S	2.22575
L125V/V226I	2.21832
V226I/V232E	2.2177
Q289G/I301T	2.21224
A178S/Y188T	2.21184
A178S/Q220T	2.21138
S123Q/Q289G	2.20967
P111I/V232A	2.20582
A270Q/Q289G	2.20467
S127T/Q289G	2.20284
V226I/Q289N	2.20244
E81G/D164A	2.20177
A191D/Q289G	2.20081
V226I/E260T	2.19229
Y179W/Q289G	2.19124
P111I/L244K	2.18989
E81N/V226I	2.18961
T110N/T236Q	2.18761
E34L/P111I	2.18607
D164A/V232A	2.1851
T110S/D164A	2.18472
D164A/V193K	2.17689
Q220A/Q289G	2.17684
P111I/S240A	2.17269
F80L/V226I	2.17178
E14Q/D164A	2.16702
T236Q/N299S	2.16684
A78T/A178S	2.16223
T69N/P111I	2.16178
Q289G/I301V	2.16101
I67V/D164A	2.16073
P111V/S305Y	2.15971
T39I/Q289A	2.1574
E81A/N299S	2.15682
S131D/A178S	2.15192
S240T/Q289G	2.1475
T110E/P111I	2.14652
S27E/Q289G	2.14381
T120A/V226I	2.14165
V152L/V226I	2.13889
A178S/Q289D	2.13258
Q220D/V226I	2.13125
A153N/D164A	2.13104
D164A/L244K	2.13012
T110N/V150L	2.12998
P111I/V193A	2.12906
E85T/V226I	2.12553
I87V/Q289G	2.11858
E14R/V226I	2.11284
P111I/L134K	2.11054
A178S/Q289P	2.1084
S12G/D164A	2.10839
S123A/Q289G	2.10709
V150L/S180T	2.10505
E14L/Q289G	2.1019
T110Q/Q289G	2.09829
D164A/Q239R	2.09811
A178S/S240D	2.09629
S27Q/Q289G	2.09566
A153S/D164A	2.09249
P111I/E148Q	2.08938
V226I/S308P	2.0882
E85S/Q289G	2.08226
D164A/Y188S	2.08008
P111I/L125V	2.079
P111L/D164A	2.07879
S149T/Q289G	2.07516
A10S/Q289G	2.07494
Q289A/S305Y	2.07308
A153Q/Q289G	2.07254
V226I/E260S	2.07032
V226I/Q289K	2.06977
V150L/N299S	2.06743
S12G/P111I	2.06479
P111V/Q220T	2.06336
E34L/D164A	2.06193
D164A/V193A	2.06057
P111T/D164A	2.05611
T77A/V226I	2.05193
V226I/E271Q	2.05136
F104Y/V226I	2.05053
E148Q/D164A	2.04995
S256D/Q289G	2.04979
S113T/V226I	2.04902
T77S/A178S	2.04732
E81Q/P111V	2.04029
A191S/Q289G	2.03709
S74A/Q289G	2.03576
I67A/Q289G	2.03455
P111V/Y188T	2.02831
P111I/Q289N	2.02788
L134K/D164A	2.02781
G92N/Q289G	2.02688
T110A/A178S	2.02233
E81A/D164G	2.02061
E81D/A178S	2.02019
V226I/S240Q	2.01773
P111I/Y188S	2.01584
V226I/S305N	2.012
F80L/P111I	2.0119
G92E/Q289G	2.01033
I48T/P111V	2.00403
T124N/Q289G	2.00344
V152F/Q289G	2.00089
A178S/N299T	1.99944
A191G/Q289G	1.99873
A153E/V226I	1.99681
L247I/Q289G	1.99486
A270E/Q289G	1.99336
P111V/D164S	1.99326
L125V/D164A	1.99111
N42S/Q289G	1.99005
D219A/Q289G	1.9823
T110N/Y188V	1.98164
T236A/N299S	1.98066
D164A/E260S	1.97635
E34Y/Q289G	1.97533
E81K/P111V	1.97476
P111I/E260T	1.97417
V226I/S305G	1.97384
T69N/D164A	1.96784
E81A/T236Q	1.96675
A178S/Q289S	1.96646
S123N/Q289G	1.96194
V226I/E271D	1.96159
A178S/T190D	1.96112
Q289G/S305A	1.95904
F104Y/P111I	1.95893
T77A/P111I	1.95859
E263T/N299S	1.95671
E81K/Q289A	1.95436
S180T/S283A	1.95397
D164E/Q289G	1.95377
T44S/N299S	1.95199
L201K/N299S	1.95093
A178S/S240E	1.94768
P111I/S280L	1.9472
T110N/L201K	1.94517
E81N/P111I	1.94471
D164A/E260T	1.94434
S18A/Q289G	1.94398
Y188T/Q289A	1.94326
V226I/T236E	1.94078
A153N/A178S	1.93861
I48T/Q289A	1.93781
M146E/Q289G	1.93775
D164G/T236Q	1.93526
Q289G/I309V	1.93455
L244V/Q289G	1.9342
P111I/V152L	1.93389
A153K/Q289G	1.93252
E81Q/Q289A	1.93207
P111I/Q220D	1.93066
E81A/V150L	1.92491
F40W/Q289G	1.92257
D164S/Q289A	1.92245
D76N/Q289G	1.92156
Y83L/V226I	1.91974
S180T/Q239K	1.91893
D164A/E263K	1.91386
P111I/S308P	1.91368
P111I/E260S	1.91191
T110E/D164A	1.91081
T110S/A178S	1.90918
V152A/Q289G	1.90791
P111I/T120A	1.90687
S180T/T236A	1.9067
S180T/Y188V	1.90652
A178S/V232A	1.9063
P111I/S113T	1.90365
V193G/V226I	1.90277
V193S/Q289G	1.90002
S84K/Q289G	1.89663
S180T/E263T	1.89657
M192L/Q289G	1.89269
P111I/Q289K	1.89205
S27T/Q289G	1.89125
E14R/P111I	1.89001
P111V/A191N	1.88586
G92D/V226I	1.88091
D164A/V232E	1.88059
T110N/S123T	1.87692
Q220T/Q289A	1.87535
E81N/D164A	1.87526
A52Q/V226I	1.87487
V150L/D164G	1.87382
V98I/V226I	1.87376
P111I/S240Q	1.87348
T236N/Q289G	1.87314
E263Q/Q289G	1.87206
D200N/V226I	1.87137
A153S/A178S	1.86906
P111V/Q289D	1.86739
V226I/I301T	1.86565
F80L/D164A	1.86535
A78D/Q289G	1.86526
E81G/A178S	1.8644
T110N/T236A	1.8592
A52K/V226I	1.85828
Q239I/Q289G	1.8568
D160N/V226I	1.85553
T110N/S283A	1.85453
D164A/S240Q	1.85446
T110N/Q239K	1.85287
E14K/V226I	1.85279
G92S/T110N	1.85245
A153D/S180T	1.85205
S180T/L201K	1.84972
V150L/T236Q	1.84827
T110N/A153D	1.84646
Q128E/Q289G	1.84625
D164A/Q289N	1.84437
V152L/D164A	1.84406
T236S/Q289G	1.84361
P111V/Q289P	1.84259
V203I/V226I	1.84168
A78T/P111V	1.84105
P111I/V232E	1.83913
K130A/A178S	1.8387
D219S/Q289G	1.83799
L244I/Q289G	1.83282
T39I/T110N	1.83251
S123E/Q289G	1.83057
Y188V/N299S	1.83011
D164A/Q220D	1.82639
V226I/G242N	1.82455
T44S/T110N	1.82243
T44S/S180T	1.82148
A178S/Y293F	1.81585
E85T/P111I	1.81514
P111V/S240D	1.81384
P111I/E271Q	1.81208
L75F/Q289G	1.81104
D164A/S308P	1.81044
E81A/Q239K	1.80729
T110A/P111V	1.8058
K93A/V226I	1.80093
E34W/Q289G	1.79968
T110N/E263T	1.79741
T110N/S123K	1.79457
I67V/A178S	1.79288
S123T/S180T	1.79261
Q289G/S305T	1.79243
S123K/N299S	1.79185
G28N/Q289G	1.79088
V232T/Q289G	1.79087
S123T/D164G	1.78839
V231L/Q289G	1.78836
I87V/V226I	1.78777
E81A/Y188V	1.78772
G82D/V226I	1.78729
P111I/A153E	1.78561
E14T/Q289G	1.78557
D219E/Q289G	1.78354
E14Q/A178S	1.78067
V99I/A178S	1.77748
Q239K/N299S	1.77552
S27E/V226I	1.77381
D164A/D200N	1.77297
A178S/V193K	1.77142
P111I/E271D	1.77114
S123T/N299S	1.77073
S283A/N299S	1.76984
P111I/S305N	1.7696
T77S/P111V	1.76841
A191N/Q289A	1.76549
T77A/D164A	1.7651
G82N/Q289G	1.76258
E81S/V226I	1.75796
V226I/S305Q	1.75729
P111V/S131D	1.75707
S18V/V226I	1.75691
A52K/P111I	1.75684
T190D/Q289A	1.75619
T77E/Q289G	1.75577
P111I/D200N	1.75222
H96Y/A178S	1.75134
A178S/V193A	1.75117
D164G/Y188V	1.75047
E14R/D164A	1.74943
A153D/N299S	1.74707
N194S/Q289G	1.74614
N42D/Q289G	1.746
S123K/S180T	1.74455
P111I/S305G	1.74414
S12K/Q289G	1.74393
S74P/Q289G	1.74367
V226I/E271A	1.74302
S113T/D164A	1.74121
T120A/D164A	1.74078
E81R/Q289G	1.73949
D164A/E271Q	1.73753
T69N/A178S	1.73349
A45S/Q289G	1.73226
V99L/Q289G	1.73063
G28A/Q289G	1.72964
E85A/Q289G	1.7278
G92S/S180T	1.72686
Q220A/V226I	1.72609
L125V/A178S	1.72591
E81D/P111V	1.72512
P111I/T236E	1.72346
T69D/Q289G	1.72295
Q119G/Q289G	1.72285
S12A/Q289G	1.72131
S127G/Q289G	1.72096
S27Q/V226I	1.72088
S273T/Q289G	1.72055
D164A/S305G	1.72044
F104Y/D164A	1.71824
Y188V/T236Q	1.71778
E81T/Q289G	1.71687
E85T/D164A	1.71651
S131D/Q289A	1.71605
S27N/Q289G	1.71282
A178S/Y188S	1.71249
S180T/S305Y	1.71111
A52Q/P111I	1.71016
V99I/P111V	1.70796
P111V/S240E	1.70729
E14K/P111I	1.70502
N299S/S305Y	1.70483
T110A/Q289A	1.70465
V98I/P111I	1.70412
E81A/T236A	1.70388
V193L/Q289G	1.70375
T77S/Q289A	1.70118
D164G/Q239K	1.70071
S123K/D164G	1.69796
D164A/S280L	1.6972
D164A/S305N	1.69666
M66L/V226I	1.69586
A178S/E263K	1.69548
D164G/T236A	1.69538
S180T/Y188T	1.69202
E81G/P111V	1.69112
A178Q/V226I	1.69036
E81A/L201K	1.68955
Q289G/N299D	1.68904
T110N/S305Y	1.68849
L269M/Q289G	1.68835
S240D/Q289A	1.68505
T77P/Q289G	1.68461
P111T/A178S	1.68449
V226I/D233S	1.68429
D164A/T236E	1.67652
P111V/Y293F	1.6754
D160N/D164A	1.67246
E81D/Q289A	1.67149
D164G/L201K	1.67046
P111I/G242N	1.66857
P111I/V193G	1.66707
G92S/N299S	1.66653
T236Q/Q239K	1.66574
T110D/Q289G	1.66364
K93L/Q289G	1.66349
V226I/S240T	1.66214
E14L/V226I	1.66041
G92S/D164G	1.6595
D164A/V203I	1.65832
Y83L/D164A	1.65653
A78T/Q289A	1.65353
V86T/Q289G	1.65328
Q289G/L307M	1.65244
Q289A/Y293F	1.651
L134N/Q289G	1.64843
D164A/Q289K	1.64726
G92D/P111I	1.64702
P111I/D233S	1.6459
T110S/P111V	1.64551
Q119K/Q289G	1.6452
V226I/Q289T	1.64121
Y188I/Q289G	1.64027
S12P/Q289G	1.63856
A178S/L244K	1.63771
S283G/Q289G	1.63493
D164A/E271D	1.63469
E148Q/A178S	1.63366
S123K/T236Q	1.63317
D164G/E263T	1.63206
T44S/E81A	1.63186
P111V/Q289S	1.63064
Q289A/N299T	1.63032
S199Q/Q289G	1.62958
T236Q/S283A	1.62954
S199E/Q289G	1.6289
S27E/P111I	1.62883
S74T/Q289G	1.62856
T110Q/V226I	1.62835
P111V/A153N	1.62811
K93Q/Q289G	1.62692
A191D/V226I	1.62689
K93N/Q289G	1.62641
S127T/V226I	1.62639
E14Q/P111V	1.6248
S84T/Q289G	1.62345
A153Q/V226I	1.6218
L201K/T236Q	1.62156
P111V/T190D	1.62073
A178S/V232E	1.61812
E85D/Q289G	1.6179
K93A/P111I	1.61656
A45T/Q289G	1.61609
T110E/A178S	1.61545
A153D/T236Q	1.61443
G82D/P111I	1.61427
D133S/Q289G	1.61376
V226I/I301V	1.61317
V226I/D233A	1.61283
S123T/T236Q	1.61143
Q220T/N299S	1.60857
V150L/Y188V	1.60831
P111V/N299T	1.60714
T39I/S180T	1.60323
D164A/D233S	1.60192
T69G/Q289G	1.60168
V150L/Q239K	1.60013
V33T/Q289G	1.59974
Y83L/P111I	1.59943
P111I/V203I	1.59817
V98I/D164A	1.59577
T44S/D164G	1.59136
A191T/Q289G	1.59115
E81A/G92S	1.59059
S127T/D164A	1.59006
Y188A/Q289G	1.58968
A178S/Q289N	1.58961
L134K/A178S	1.58912
D164G/S283A	1.58776
T110N/Y188T	1.58719
A153D/D164G	1.58692
T39I/N299S	1.58671
E34L/P111V	1.58665
V226I/A270E	1.58624
P111I/D160N	1.58553
E34L/A178S	1.58467
A178S/S240A	1.58462
E81K/S180T	1.58409
P111V/A153S	1.58201
S123T/V150L	1.58003
S74A/V226I	1.57887
H96Y/P111V	1.57878
E81S/P111I	1.57856
V150L/A153D	1.57831
V226I/L247I	1.57672
D164A/V193G	1.57484
I67A/V226I	1.57313
T110N/D164S	1.57128
V99I/Q289A	1.57025
V150L/S283A	1.5682
V150L/T236A	1.56508
E81G/Q289A	1.5635
V226I/Q289H	1.56298
A270S/Q289G	1.56291
V226I/A270Q	1.56273
P111L/A178S	1.56162
Y179W/V226I	1.56139
G92D/D164A	1.56046
A52K/D164A	1.56037
I246V/Q289G	1.55934
E85S/V226I	1.559
P111I/A191D	1.55665
I67V/P111V	1.55442
D164A/G242N	1.55422
E81Q/T110N	1.55362
V226I/S256D	1.55334
E81N/A178S	1.55301
S123T/A153D	1.54875
S27Q/P111I	1.54746
A153N/Q289A	1.54744
G245A/Q289G	1.54714
S18V/D164A	1.54697
T44S/T236Q	1.54668
Q289G/I301P	1.54639
A178S/Q239R	1.54601
E148T/Q289G	1.54401
G92N/V226I	1.54338
P111I/Q220A	1.5432
A178S/E260T	1.54234
S11G/Q289G	1.54188
D219A/V226I	1.5404
E14Q/Q289A	1.54
G92Q/Q289G	1.53935
M66L/P111I	1.53931
V150L/L201K	1.53821
P111V/L244K	1.53524
D147P/Q289G	1.53392
T236A/Q239K	1.53239
I87V/P111I	1.53192
D147E/Q289G	1.53146
P111V/K130A	1.53083
E14K/D164A	1.53075
V232A/Q289A	1.53011
E81A/E263T	1.52832
L75I/Q289G	1.52594
V226I/S305A	1.52473
D164E/V226I	1.52441
P111V/V232A	1.51951
S123K/V150L	1.51939
E81K/T110N	1.51805
S18V/P111I	1.51542
I48T/N299S	1.5151
I67V/Q289A	1.51499
S123Q/V226I	1.51383
P111V/V193K	1.51252
M66L/D164A	1.51055
D164A/Y179W	1.50948
A52Q/D164A	1.5064
Y188V/S283A	1.50519
S180T/Q289P	1.50457
P111I/S305Q	1.50383
E81A/S123K	1.50361
I48T/S180T	1.5035
L244K/Q289A	1.50337
P111V/S240A	1.50171
T236Q/E263T	1.50082
S149T/V226I	1.50004
V193K/Q289A	1.49997
Q289G/M295L	1.49981
D164A/E271A	1.49979
D164A/D233A	1.49959
T110N/Q220T	1.49804
P111I/E271A	1.49793
P111Q/Q289G	1.49777
E81A/S305Y	1.49762
T124N/V226I	1.49562
Q289G/I301A	1.49544
P111V/Q239R	1.49479
V150L/E263T	1.49297
E271N/Q289G	1.48995
P111I/S127T	1.4895
E148N/Q289G	1.48868
E260A/Q289G	1.48855
A153E/D164A	1.48812
Q119E/Q289G	1.48693
P111I/A178Q	1.48631
K93A/D164A	1.48576
Y188V/Q239K	1.48494
P111I/A153Q	1.48462
G92S/T236Q	1.48376
D219E/V226I	1.4836
Y188S/Q289A	1.48216
E81Q/S180T	1.48179
P111I/L247I	1.48151
E81Q/N299S	1.47928
S180T/Q220T	1.47912
A78D/V226I	1.47712
K130A/Q289A	1.47436
D164N/Q289G	1.47418
T44S/V150L	1.4736
P111I/A191S	1.47173
P111I/I301T	1.47125
A178G/Q289G	1.47088
S12G/A178S	1.47027
D164S/N299S	1.46933
T110N/A191N	1.4683
D164S/S180T	1.46737
T110S/Q289A	1.46655
A191S/V226I	1.46587
A178S/E260S	1.46551
T77S/T110N	1.46486
T236K/Q289G	1.46482
V152A/V226I	1.46264
E81A/A153D	1.46234
A153S/Q289A	1.46102
P111V/V193A	1.45945
P111V/E263K	1.45934
E260Q/Q289G	1.45872
V226I/E263Q	1.45832
T120A/A178S	1.45734
E34L/Q289A	1.45603
T39I/E81A	1.45589
D164A/Q220A	1.45532
S131N/Q289G	1.45115
A153K/V226I	1.45102
T39I/T236Q	1.45097
S240E/Q289A	1.4498
G82D/D164A	1.44906
E263K/Q289A	1.44647
S27E/D164A	1.44604
I48T/T110N	1.44585
T39I/D164G	1.4447
P111I/Q289T	1.44195
T77S/S180T	1.44152
S180T/S240D	1.44148
D164G/S305Y	1.44063
S180T/Q289D	1.43991
T69N/P111V	1.43959
G92S/Q239K	1.43924
N42S/V226I	1.43818
A178S/Q220D	1.43755
P111I/S256D	1.43722
A178S/S308P	1.43575
D164A/A178Q	1.43458
S123R/Q289G	1.43259
H96Y/Q289A	1.42926
T69S/Q289G	1.42806
F80L/A178S	1.4267
P111I/S240T	1.4247
V152L/A178S	1.42149
E148S/Q289G	1.41975
T44S/T236A	1.4193
E14L/P111I	1.41888
T69N/Q289A	1.41885
T236Q/S305Y	1.41874
E81A/S283A	1.41675
E14R/A178S	1.41456
P111I/D233A	1.41397
P111V/Y188S	1.41376
P111I/Y179W	1.41343
Q289G/I309L	1.41309
Y188T/N299S	1.41295
S123T/L201K	1.41279
P111V/L125V	1.41112
I87V/D164A	1.41093
A10S/V226I	1.41089
V226I/I309V	1.41055
M146E/V226I	1.41026
D164A/S240T	1.40947
D164A/I301T	1.40895
S18A/V226I	1.40607
D164G/Y188T	1.40577
V193S/V226I	1.40537
P111V/L134K	1.4049
S123A/V226I	1.40414
P111I/A191G	1.40369
Q128E/V226I	1.40026
V193A/Q289A	1.40024
G92S/V150L	1.399
T77A/A178S	1.3971
P111I/A270Q	1.39684
A52E/Q289G	1.3955
D164A/A191D	1.39486
A191G/V226I	1.3946
Y188V/L201K	1.3924
G92S/S123T	1.39199
S113T/A178S	1.39081
N194A/Q289G	1.38907
I202L/Q289G	1.38805
D164A/S305Q	1.38672
T236D/Q289G	1.38661
G92A/Q289G	1.38511
S131D/N299S	1.38509
E81K/N299S	1.38411
S123K/L201K	1.38329
