# Supplementary material for: Exploring sequence- and structure-based fitness landscapes to enhance thermal resistance and activity of endoglucanase II with minimal experimental effort
Source: RSC Chem Biol. 2025 May 5;6(6):975–86. doi: 10.1039/d5cb00013k (PMC12080268; doi:10.1039/d5cb00013k)
Supplement: CB-006-D5CB00013K-s002 [file CB-006-D5CB00013K-s002.xlsx]

## Sheet: Sheet1
Predicted EGLII variants	ΔE
Q289G	3.13468
V226I	2.63336
P111I	2.42482
D164A	2.33714
A178S	1.96625
P111V	1.71899
Q289A	1.64756
S180T	1.26132
T110N	1.21945
N299S	1.18195
E81A	1.00277
D164G	0.98517
T236Q	0.927455
V150L	0.871669
Y188V	0.699396
T236A	0.683819
Q239K	0.675118
L201K	0.67012
S123T	0.665432
A153D	0.661438
S123K	0.616061
T44S	0.60849
G92S	0.593437
E263T	0.587351
S283A	0.544109
T39I	0.489407
S305Y	0.435316
D164S	0.298001
Y188T	0.295936
E81Q	0.276857
E81K	0.257114
Q220T	0.247662
I48T	0.209146
A191N	0.169341
Q289P	0.153054
Q289D	0.140405
S131D	0.103458
S240D	0.0795321
T77S	0.0766022
T110A	0.0255113
A78T	0.0243104
E81D	-0.00653196
Q289S	-0.0267761
N299T	-0.0412969
T190D	-0.0449747
Y293F	-0.0496263
E81G	-0.0791653
S240E	-0.07921
V99I	-0.0861889
A153N	-0.134353
E14Q	-0.138509
V193K	-0.150244
K130A	-0.150437
I67V	-0.158922
T110S	-0.173739
V232A	-0.184304
A153S	-0.186151
Q239R	-0.219417
H96Y	-0.222151
E34L	-0.240183
S240A	-0.243044
L244K	-0.246375
E263K	-0.251418
P111L	-0.254131
T69N	-0.256136
V193A	-0.279911
Y188S	-0.324189
P111T	-0.34834
E148Q	-0.350997
L134K	-0.36416
L125V	-0.37553
T110E	-0.395911
S12G	-0.404564
E81N	-0.443503
Q289N	-0.451149
V232E	-0.474749
F80L	-0.48883
E260S	-0.501762
E14R	-0.510288
E260T	-0.517719
S308P	-0.51869
T77A	-0.523665
S280L	-0.532825
S113T	-0.533895
S240Q	-0.539858
Q220D	-0.552343
T120A	-0.553203
V152L	-0.55948
Q289K	-0.60073
F104Y	-0.612464
E271Q	-0.634118
D200N	-0.661465
S305G	-0.664682
S305N	-0.66726
E85T	-0.69471
E271D	-0.699462
A52K	-0.703321
A153E	-0.705013
Y83L	-0.717562
T236E	-0.720394
G92D	-0.757313
E14K	-0.774651
G242N	-0.777423
V193G	-0.787099
A52Q	-0.787982
V203I	-0.80006
G82D	-0.832136
K93A	-0.837349
D160N	-0.840472
V98I	-0.840668
E271A	-0.876661
D233S	-0.884144
S18V	-0.885649
E81S	-0.88957
S27E	-0.897038
M66L	-0.902203
S305Q	-0.909831
A178Q	-0.910422
S127T	-0.92312
I87V	-0.932721
A191D	-0.958733
Y179W	-0.964545
I301T	-0.965979
Q220A	-0.975998
S240T	-0.979445
S27Q	-0.988002
D233A	-0.988918
A270Q	-1.00163
Q289T	-1.00273
A270E	-1.01938
S123Q	-1.04009
S256D	-1.05511
E14L	-1.05946
I301V	-1.08988
A153Q	-1.10453
T110Q	-1.10704
S123A	-1.11061
A10S	-1.11093
S74A	-1.11128
I67A	-1.1183
A191S	-1.11906
A191G	-1.12074
Q289H	-1.12411
G92N	-1.13232
E85S	-1.14788
D219A	-1.14966
S305A	-1.15102
S149T	-1.15302
L247I	-1.15728
N42S	-1.15806
T124N	-1.16318
F40W	-1.1943
D164E	-1.19945
A78D	-1.22113
G92E	-1.22679
D219E	-1.22786
E34Y	-1.23471
I309V	-1.23647
S27T	-1.23721
Q128E	-1.24735
E263Q	-1.24919
V152F	-1.25059
M146E	-1.25416
S18A	-1.25487
L244V	-1.25993
V152A	-1.26265
A153K	-1.27659
D219S	-1.27774
V193S	-1.28029
S123N	-1.28064
N194S	-1.29795
M192L	-1.30714
Q239I	-1.30825
S84K	-1.31062
T236S	-1.3137
L244I	-1.32178
E85A	-1.33449
V232T	-1.34056
S74P	-1.34109
T69D	-1.34473
Q119G	-1.34482
N42D	-1.36286
D76N	-1.37604
S305T	-1.37979
S127G	-1.3811
V193L	-1.38389
T236N	-1.38699
T77E	-1.38726
E34W	-1.39244
L75F	-1.39259
S123E	-1.3984
S27N	-1.40235
Y188I	-1.41635
T77P	-1.42056
A45S	-1.42273
S12A	-1.42575
G82N	-1.42645
S273T	-1.42649
E14T	-1.42733
L269M	-1.43124
E81R	-1.43534
K93Q	-1.4359
K93N	-1.43653
S12K	-1.44435
Y188A	-1.45383
V99L	-1.45776
G28N	-1.46107
N299D	-1.46733
S283G	-1.46852
Q289E	-1.46933
K93L	-1.47793
V86T	-1.47818
T110D	-1.48186
E81T	-1.48796
T69G	-1.50094
V33T	-1.50257
G28A	-1.5036
S84T	-1.5208
S12P	-1.52321
A270S	-1.52813
S74T	-1.53537
S199Q	-1.53636
Q119K	-1.53779
A191T	-1.53927
S11G	-1.54474
D147E	-1.54693
S199E	-1.54726
I246V	-1.555
P111Q	-1.55711
L134N	-1.56055
N194A	-1.56961
D133S	-1.57263
E85D	-1.57833
V231L	-1.59011
E148N	-1.60902
G245A	-1.61185
A45T	-1.61653
L307M	-1.62343
I301A	-1.62816
Q119E	-1.63206
L75I	-1.64099
E271N	-1.64719
I301P	-1.65412
E260A	-1.6559
A165T	-1.6569
E148T	-1.65705
D147P	-1.66146
D164N	-1.66223
G92Q	-1.66851
S131N	-1.67155
T236K	-1.67969
A52E	-1.68145
Y188N	-1.68146
I202L	-1.70405
E260Q	-1.70473
F80M	-1.7155
I309L	-1.72985
D51S	-1.73079
T236D	-1.74701
Y268H	-1.74707
Q289R	-1.75394
G92A	-1.75419
E229D	-1.75436
S21A	-1.75645
V150T	-1.76621
S123R	-1.76905
E148S	-1.77636
T44A	-1.77897
T69S	-1.78071
H144N	-1.78625
V150D	-1.79204
G161A	-1.79379
M295L	-1.79501
A178G	-1.79917
S305E	-1.80605
A270V	-1.80617
V232Q	-1.82805
Q220V	-1.83627
R9S	-1.84024
S308D	-1.85496
E271S	-1.85913
M54F	-1.86599
Y108N	-1.86923
A10T	-1.87193
L244R	-1.8727
K93S	-1.88028
E148G	-1.88162
L134H	-1.88879
T110K	-1.89204
T190E	-1.9005
I246F	-1.90078
L75P	-1.90147
V231I	-1.90437
Q47D	-1.92065
L134R	-1.93358
V150N	-1.93893
S223N	-1.94129
I67T	-1.948
F16L	-1.94871
T39R	-1.95169
S123G	-1.95344
S280I	-1.96733
S12V	-1.9735
A254V	-1.9806
A191V	-1.98554
P111R	-1.9856
Y188Q	-1.99034
E14V	-1.99294
F16V	-2.0043
S280M	-2.00849
E263D	-2.01264
L75V	-2.01773
I50M	-2.02083
N88E	-2.02888
I30L	-2.03756
Q119A	-2.04571
T77Q	-2.05048
Q128A	-2.05357
F13L	-2.05512
S12N	-2.0577
S240N	-2.05901
D164T	-2.06486
Y143F	-2.06923
A191Y	-2.08046
N19S	-2.08094
E85Q	-2.08209
A254N	-2.08365
D164R	-2.08444
A153R	-2.08498
I309T	-2.08657
M71L	-2.09219
A52D	-2.09425
N194G	-2.09467
K130S	-2.09725
E260D	-2.0994
I292M	-2.12365
Q220E	-2.12382
V232S	-2.12657
Q128V	-2.13729
Y188G	-2.13839
S305P	-2.13868
G28T	-2.14151
L62M	-2.14872
A52S	-2.15148
F250Y	-2.15353
E263R	-2.15723
G92T	-2.15791
E259K	-2.16095
V232K	-2.16931
M71I	-2.17033
S199L	-2.1727
L307D	-2.17748
S149D	-2.18482
P111A	-2.1876
T187D	-2.1877
L277M	-2.19972
Q220N	-2.20467
S305K	-2.2069
I50R	-2.20757
E263S	-2.20919
D290N	-2.21093
Q128R	-2.21644
V150Q	-2.21924
K130V	-2.22485
T36K	-2.23227
A10G	-2.2383
L277T	-2.24052
T44D	-2.24083
G92K	-2.24485
G242K	-2.24865
H96W	-2.25517
T43P	-2.2555
V257Q	-2.25905
T39V	-2.2636
S84N	-2.26618
Y268A	-2.26976
S224A	-2.27487
Q220S	-2.27617
T77D	-2.2773
I48V	-2.28068
S123V	-2.28508
D219G	-2.28658
A153T	-2.2884
W15F	-2.28845
M295F	-2.29362
D233G	-2.29982
S123H	-2.30186
I67S	-2.3021
E85K	-2.30606
L244Q	-2.30635
S18T	-2.30664
V226A	-2.31121
E14D	-2.3173
V59I	-2.32287
S127K	-2.324
A78G	-2.33171
Q228K	-2.33294
D267S	-2.33704
P111K	-2.33908
S18I	-2.33921
F16I	-2.33989
S123Y	-2.34048
T190A	-2.35965
L75Y	-2.37039
D117G	-2.3705
S11A	-2.37195
Q228A	-2.37366
A52R	-2.37728
P111F	-2.37848
L244T	-2.37905
S199N	-2.38688
S240K	-2.38806
V193I	-2.38855
N299A	-2.39309
N299G	-2.40103
L125I	-2.41595
S11T	-2.41611
A270K	-2.41684
A52L	-2.41864
E14P	-2.41869
G82S	-2.42171
D164K	-2.42454
V150I	-2.43023
T187S	-2.43049
G28K	-2.43086
D219T	-2.43205
S305D	-2.43307
Q228V	-2.4358
H144Y	-2.44243
D145T	-2.44352
D290S	-2.45075
N88K	-2.45142
N194D	-2.45374
V150S	-2.45376
T110G	-2.45433
T110V	-2.45918
D290T	-2.45946
Q239E	-2.4644
D51N	-2.46782
A284G	-2.46844
S131T	-2.47023
S305V	-2.47127
L75A	-2.47198
V262I	-2.47332
A153G	-2.47364
A10R	-2.47703
I48A	-2.4799
M295I	-2.48268
A165V	-2.48733
S127A	-2.48739
T44N	-2.48881
K130R	-2.49345
R9K	-2.49841
S305L	-2.49961
Q289L	-2.50368
R9A	-2.50821
I90V	-2.50978
S12E	-2.51149
Y89F	-2.51157
S12T	-2.51228
L307I	-2.5218
S256A	-2.52704
A178D	-2.53866
S240R	-2.53868
S74D	-2.53903
N88D	-2.54435
S74E	-2.54709
L201R	-2.55249
H96F	-2.55514
G28Q	-2.55562
Q289V	-2.55566
Y38F	-2.55589
N299V	-2.56115
P198S	-2.5657
E34V	-2.57019
E271K	-2.57051
N177T	-2.57069
T110R	-2.57903
E271T	-2.58349
A270G	-2.58641
E263A	-2.58795
V174A	-2.5904
A52G	-2.59498
A52T	-2.59634
T236R	-2.60001
S84Q	-2.60449
E85G	-2.60805
I48Y	-2.60814
D267E	-2.60931
E85N	-2.61092
T190Q	-2.61108
G28D	-2.61183
T44E	-2.61572
A95G	-2.61711
D147A	-2.61885
E259Q	-2.62054
Q228S	-2.622
V193T	-2.62226
S273A	-2.62461
K93T	-2.63009
E34K	-2.63055
S127N	-2.63168
D51G	-2.63171
Q128L	-2.63654
V193Q	-2.6443
Y83I	-2.64458
D133A	-2.6451
F129Y	-2.65003
E263N	-2.65171
S84V	-2.65221
P298T	-2.65275
D219P	-2.65482
A302G	-2.65772
T115P	-2.66331
A78E	-2.66432
R9T	-2.6646
E263V	-2.66558
A78N	-2.67796
S116T	-2.68362
A270D	-2.69407
V226T	-2.69579
T69P	-2.69995
S256T	-2.70102
D160T	-2.70377
I50V	-2.7096
S294N	-2.7096
L201N	-2.7117
T124K	-2.71932
Q228R	-2.72041
A10K	-2.72182
D267N	-2.72754
P68Q	-2.7294
M295V	-2.73395
Q128K	-2.74267
Q128P	-2.74496
N88S	-2.74847
T190V	-2.75332
D51A	-2.75799
D233E	-2.7595
M265L	-2.76274
N299Q	-2.77452
D133P	-2.77622
A254S	-2.78396
E14S	-2.78937
L75M	-2.79457
P111E	-2.79627
P41A	-2.79635
Q289Y	-2.7971
S224T	-2.79788
L277K	-2.79795
D117A	-2.80605
M66I	-2.80801
E229Q	-2.80855
S116D	-2.80916
E148D	-2.81067
T69E	-2.81193
S149A	-2.81633
E34A	-2.81748
T115V	-2.82349
T115A	-2.8236
S305R	-2.83175
D133N	-2.83912
I48F	-2.84264
S280A	-2.84517
K93R	-2.84774
E81V	-2.84904
P111S	-2.85264
L307V	-2.8561
V152R	-2.86357
E14Y	-2.86819
S74N	-2.86937
S27P	-2.8726
T120S	-2.87677
E81H	-2.8818
V232R	-2.88314
Y188E	-2.88627
Y108D	-2.89672
D164Q	-2.89797
I67L	-2.90056
V33E	-2.90089
S123L	-2.90481
S280V	-2.91453
F61I	-2.9184
S149Q	-2.92024
S74K	-2.92053
S11K	-2.9215
L62R	-2.92162
E14W	-2.92193
V152Y	-2.92859
D145G	-2.92967
E34F	-2.93027
V193R	-2.9313
N88T	-2.93155
I48E	-2.93167
I48S	-2.93731
A10D	-2.94033
V257T	-2.94041
F16A	-2.94393
R9G	-2.94433
I301S	-2.94467
N299K	-2.94488
V193E	-2.9471
T44G	-2.95378
N299E	-2.95823
Q128H	-2.95877
D147S	-2.95934
S114D	-2.96471
L307N	-2.97207
T43A	-2.97372
S149E	-2.97387
G28S	-2.97558
D76A	-2.97673
V203A	-2.97978
N42A	-2.98038
Y188L	-2.98092
G92R	-2.98223
E14I	-2.9825
S273N	-2.98552
S280E	-2.98597
Q119S	-2.99018
T39Y	-2.99218
T77K	-2.99345
E229S	-2.9949
K93H	-2.99807
H96S	-2.99967
T236G	-3.00004
S84I	-3.0038
L62S	-3.00532
T43N	-3.01689
I172V	-3.02185
T186V	-3.02592
A153L	-3.03317
Y83M	-3.03432
L277V	-3.03518
Q47G	-3.03771
S294G	-3.04385
Q228E	-3.04511
S131G	-3.04877
I30Y	-3.04905
G214S	-3.05693
Y89H	-3.0601
F16T	-3.06368
L307W	-3.06561
A95S	-3.06996
T190S	-3.07273
S84E	-3.07333
A165S	-3.07367
E263Y	-3.07408
P111M	-3.08365
P101A	-3.0856
G82E	-3.08833
D267Q	-3.09405
Y188D	-3.09721
N42E	-3.0977
A10N	-3.10227
V98L	-3.1026
E229N	-3.10429
I246L	-3.10984
D200G	-3.11008
G73A	-3.11421
A178H	-3.11786
T69A	-3.12056
Y268F	-3.12411
N194Q	-3.12799
S12R	-3.13105
S256P	-3.13213
S12Q	-3.13223
V86A	-3.13244
M66V	-3.13649
L134Y	-3.13768
T187Q	-3.13897
S84D	-3.14011
I301Q	-3.14194
D133E	-3.14452
S280T	-3.14611
T190G	-3.14798
S116A	-3.1489
P111D	-3.15113
I301K	-3.15188
S199A	-3.15206
T187N	-3.15443
V150H	-3.1566
L307F	-3.16135
T69V	-3.16169
A10V	-3.16335
I48Q	-3.16405
T39A	-3.16557
E259R	-3.16584
N194T	-3.16893
N42T	-3.17311
V232I	-3.1736
P198T	-3.17912
E148A	-3.18148
S123F	-3.18563
V193N	-3.1894
G82A	-3.19048
F80A	-3.19128
P298D	-3.194
S27D	-3.19575
G82R	-3.19788
S256E	-3.19962
K130Q	-3.20279
Q289I	-3.20485
V203L	-3.20812
S84R	-3.2082
T69Q	-3.21058
Q239A	-3.21176
L62A	-3.21209
V150A	-3.2152
T190P	-3.21626
D147G	-3.22219
P60A	-3.22228
D267T	-3.22278
D164V	-3.22761
P298S	-3.22943
E205Q	-3.2295
E14N	-3.23245
T44K	-3.23286
S11N	-3.23367
I292F	-3.23466
S308T	-3.23572
Y188H	-3.23878
S113N	-3.24055
Q119R	-3.2428
E259L	-3.24369
G109D	-3.24473
V86I	-3.24865
Y143P	-3.24942
G73S	-3.25032
M71V	-3.25232
T36V	-3.25341
N88Q	-3.25536
N189G	-3.25682
S199V	-3.25771
T39F	-3.26105
I136V	-3.26249
S123I	-3.26388
A270T	-3.26655
L307K	-3.26664
R9N	-3.27655
S305I	-3.27772
T43E	-3.27913
E85V	-3.28339
Y306M	-3.28405
N299R	-3.28495
G109N	-3.28537
V226L	-3.28549
I301E	-3.28682
L125M	-3.28735
E148P	-3.28735
A178N	-3.28818
D147T	-3.28962
N42V	-3.29822
T69K	-3.29984
A10L	-3.30296
T190N	-3.30597
G82K	-3.30712
D267A	-3.31046
T186A	-3.31098
Y306V	-3.31415
K130T	-3.32488
A153V	-3.32623
L195I	-3.33724
R9Q	-3.33844
L49F	-3.33909
V257D	-3.33944
V33A	-3.33947
S280C	-3.33955
A52N	-3.33995
E260N	-3.34278
L62K	-3.34484
V152P	-3.34587
M54Y	-3.34775
A279W	-3.34793
F250I	-3.35311
A191R	-3.35792
L277I	-3.35916
M146I	-3.36685
T186N	-3.3718
A270L	-3.3817
E81M	-3.3822
L277A	-3.38262
P111N	-3.38473
A191H	-3.38605
Q289W	-3.38762
E263G	-3.38999
E263I	-3.39128
Q289M	-3.39159
N19D	-3.39313
T110Y	-3.39897
T77R	-3.40146
I48H	-3.4015
S113E	-3.40183
T110H	-3.40423
A270R	-3.40686
L277Q	-3.40855
T139C	-3.40999
Y188R	-3.4123
A52M	-3.4128
V226R	-3.41427
P111G	-3.4199
A158C	-3.42321
E259V	-3.42398
Y188K	-3.42613
E14A	-3.42707
V226N	-3.42718
A191P	-3.42822
I50L	-3.4301
D233T	-3.43143
Q220I	-3.43192
N299P	-3.43463
L201H	-3.43657
Q239L	-3.43676
A153P	-3.44113
A95V	-3.44127
L134S	-3.44162
S74G	-3.44425
V150E	-3.44445
L134Q	-3.44776
Q239T	-3.45289
D51E	-3.45738
E263P	-3.45874
E14M	-3.45911
Q239N	-3.4647
Y293A	-3.46573
S305H	-3.46805
A23G	-3.46851
Q47S	-3.47033
I162V	-3.47394
T217S	-3.47647
A191I	-3.47911
T43K	-3.48153
A78S	-3.48637
E81L	-3.48788
I309S	-3.48832
A178F	-3.49192
Y188W	-3.49583
L269V	-3.49976
S218H	-3.50092
V257N	-3.50234
Y108S	-3.50262
S27A	-3.50561
A251G	-3.50739
D133T	-3.51117
Q47K	-3.51402
Q239V	-3.51928
G82Q	-3.52135
A153I	-3.52256
Q47A	-3.52619
V193F	-3.52775
T77N	-3.5287
E260K	-3.53039
T115Y	-3.53201
E271G	-3.5324
Q128N	-3.53554
A10Q	-3.53902
Q220L	-3.53959
A78K	-3.54181
H96T	-3.54599
S308E	-3.54603
T43L	-3.54611
T72S	-3.54761
S18M	-3.55257
T187E	-3.55373
L307A	-3.55537
F16M	-3.5562
V193H	-3.55632
G253A	-3.5595
D267K	-3.56096
V98A	-3.56293
Y108K	-3.5694
I67Q	-3.56951
V99F	-3.57082
A254D	-3.57384
S18L	-3.57521
S240V	-3.57641
E260R	-3.57737
S27G	-3.57826
V86S	-3.58054
A270H	-3.58084
A254P	-3.58092
D233N	-3.58456
G92V	-3.59171
V59L	-3.59285
K130G	-3.5947
E259I	-3.59627
I67C	-3.6019
F80V	-3.60542
F80S	-3.60685
A45K	-3.60843
D145S	-3.61447
T187K	-3.62081
S27K	-3.62669
Q289F	-3.62811
A52V	-3.63057
V33K	-3.63195
F250T	-3.63333
A52H	-3.63947
I67N	-3.64417
N42L	-3.64883
E263F	-3.64929
I48L	-3.65303
A10P	-3.6547
E14F	-3.65545
N272A	-3.65604
E271R	-3.65721
P111H	-3.65821
L277S	-3.65882
T190K	-3.66029
A191F	-3.66201
A178Y	-3.6665
I56T	-3.66667
M54L	-3.66939
V226D	-3.67039
S12I	-3.67173
S294A	-3.67285
S224G	-3.67322
T115N	-3.6764
V226E	-3.67774
Y293S	-3.67853
V226S	-3.6794
D233P	-3.67963
D100E	-3.68013
A191L	-3.68171
V152K	-3.68236
Q128I	-3.68255
S308K	-3.68331
Y83F	-3.6838
I50H	-3.68476
A191E	-3.68519
H96N	-3.6866
L269I	-3.68757
G82P	-3.68823
S180A	-3.68935
I48P	-3.69213
V193P	-3.6931
E229T	-3.69767
D147N	-3.69799
A178E	-3.7001
L75T	-3.70362
Q220G	-3.70854
I50T	-3.7096
V152G	-3.71606
V150G	-3.71743
V193D	-3.71922
S308N	-3.7229
I50K	-3.72334
D267G	-3.72408
S308A	-3.72437
T43Q	-3.72473
Y293T	-3.72621
E20Q	-3.72725
G82H	-3.73022
K93M	-3.73195
I46V	-3.73424
V232M	-3.73517
Y188P	-3.73703
E148V	-3.73845
V152T	-3.73942
T236V	-3.74069
S113D	-3.74164
T120K	-3.74176
S256N	-3.74428
E259Y	-3.74598
T139I	-3.74629
Y293Q	-3.74802
A191M	-3.7515
F61L	-3.75263
F80Q	-3.75266
L244N	-3.75332
V226Q	-3.75334
S131A	-3.75504
F25W	-3.75885
D160K	-3.75906
T196V	-3.7617
L134G	-3.76279
M66A	-3.76349
P60G	-3.76818
Y268S	-3.76822
V150K	-3.76917
E34S	-3.76972
S305M	-3.76988
S11R	-3.77279
Y108F	-3.77395
T77G	-3.77569
K93G	-3.7776
K93I	-3.7786
S127Q	-3.77991
T196S	-3.78808
D219Q	-3.78858
V232G	-3.79148
E229A	-3.79256
M295Y	-3.79268
F121W	-3.79292
I112M	-3.79474
S116N	-3.7949
Q47T	-3.7952
A45D	-3.79762
V226F	-3.80285
I309A	-3.80375
N299Y	-3.80558
A178L	-3.80887
L244M	-3.80955
Y89G	-3.8099
D51K	-3.81173
Y89A	-3.81511
A78L	-3.81585
Y108R	-3.8179
S12D	-3.81833
T115S	-3.82408
G22C	-3.82433
T196Q	-3.8248
Y188F	-3.82654
A23P	-3.82709
S114N	-3.82741
I50Q	-3.82845
T44Q	-3.82945
S273G	-3.82968
D219V	-3.82981
P68S	-3.83114
L125F	-3.83351
V150M	-3.83602
E85R	-3.83828
P60Q	-3.84573
D133K	-3.84759
A302S	-3.84765
N194K	-3.85022
A279G	-3.85255
S308G	-3.853
T72G	-3.85343
V226G	-3.85344
I67F	-3.85829
S127R	-3.85844
G35N	-3.85975
T184S	-3.86124
S27Y	-3.86196
V33Q	-3.8624
A191W	-3.86308
D76S	-3.8642
T110I	-3.86557
V262L	-3.86571
T77V	-3.86951
D133Q	-3.87023
G242R	-3.87083
L125T	-3.87217
Y306I	-3.87231
N155M	-3.87603
S131K	-3.87612
S149N	-3.87641
A178R	-3.87665
T43D	-3.87719
F61T	-3.87878
E260G	-3.88221
G252A	-3.8827
T110L	-3.88271
I301G	-3.88437
G92L	-3.88511
I48R	-3.88754
P111Y	-3.89141
E260P	-3.89245
Y107F	-3.8937
V150R	-3.89472
G242Q	-3.89775
R9P	-3.89986
N42P	-3.90015
S199I	-3.90136
A78P	-3.90175
S127E	-3.90402
E260I	-3.90461
H96Q	-3.90556
T196K	-3.90722
E34N	-3.91132
L247V	-3.91179
D164L	-3.91577
I87L	-3.9201
V232L	-3.92085
E148I	-3.92297
V98M	-3.92483
A78Q	-3.92531
I30F	-3.93448
Q119T	-3.93621
P298E	-3.93876
A279V	-3.94313
V86L	-3.94467
D233V	-3.95121
E34P	-3.95422
Q220K	-3.95461
P60N	-3.95497
V150Y	-3.9608
I202T	-3.96135
V174I	-3.96585
G82L	-3.96651
E14G	-3.96922
I246M	-3.96959
S305F	-3.96984
S308Q	-3.97122
L134A	-3.97236
Y89T	-3.97423
P68V	-3.97927
D164H	-3.97929
S116E	-3.97986
D233L	-3.98821
Q128S	-3.9905
N299L	-3.99104
E260V	-3.99156
I50A	-3.9929
N299W	-3.99305
T44P	-3.99347
S12H	-3.99491
V152Q	-3.99514
S131E	-3.99529
F80I	-3.99996
I48G	-4.00059
S11Q	-4.00137
D133G	-4.00228
S212A	-4.00334
E271L	-4.00339
S74Q	-4.00413
S84A	-4.00432
V86Q	-4.00763
A158G	-4.01041
S12L	-4.01478
A270N	-4.01615
S12Y	-4.0169
E34H	-4.0288
D51R	-4.03016
S273D	-4.03021
V226K	-4.03054
T69L	-4.03751
K130H	-4.03893
T110M	-4.03955
G161S	-4.04049
V232D	-4.04053
G92H	-4.04133
Y204F	-4.04308
Y291T	-4.04344
S18F	-4.04584
G22V	-4.04639
G82M	-4.04664
D117N	-4.04739
K130N	-4.04828
G242D	-4.04852
G264D	-4.04882
S180N	-4.05099
L154M	-4.05186
I112V	-4.05205
I301N	-4.05528
D233K	-4.05555
T39Q	-4.0557
I301D	-4.05746
S240H	-4.05979
D164M	-4.06151
I48K	-4.06265
D37H	-4.06801
D51Q	-4.06938
S127L	-4.07097
P41Y	-4.07239
I48N	-4.07282
Q220Y	-4.07356
D213N	-4.07772
A52I	-4.07821
H96K	-4.07877
I48W	-4.07925
P298K	-4.07942
V232N	-4.08211
D164I	-4.08286
T69R	-4.08458
A191K	-4.0873
A45Q	-4.08786
M192F	-4.08964
M146V	-4.09086
S123M	-4.09416
S240L	-4.0962
S212G	-4.0996
L307T	-4.09996
A191Q	-4.10353
Q239H	-4.10517
V193M	-4.10523
G82Y	-4.10612
E259M	-4.10653
A251S	-4.1068
Q47E	-4.10754
A279F	-4.10833
E263H	-4.11214
Y204I	-4.11252
Y293M	-4.11286
E260L	-4.11402
D267C	-4.11562
T77L	-4.11658
A178T	-4.11861
I309W	-4.12177
E14H	-4.12271
W15Y	-4.12279
A95K	-4.12581
D200S	-4.12608
I309K	-4.12766
F13M	-4.12895
N299H	-4.13163
S199Y	-4.13214
K93V	-4.13294
I136M	-4.13693
S212T	-4.13934
S240G	-4.14047
T187V	-4.14367
P68R	-4.1438
S11P	-4.14591
E263C	-4.14594
F80Y	-4.14641
I172L	-4.15011
H96I	-4.15151
V86F	-4.15162
T39S	-4.15482
E263M	-4.1574
D233R	-4.1577
T44R	-4.15817
N255D	-4.15867
Q239S	-4.15908
V150P	-4.16152
I50Y	-4.16495
V226H	-4.16497
T168K	-4.16523
A178V	-4.16577
F80T	-4.166
A157S	-4.16679
Y268T	-4.16777
I67M	-4.17025
F61V	-4.17059
E259N	-4.1779
M146Q	-4.18032
T236L	-4.18098
I159V	-4.18216
A97V	-4.18278
L201M	-4.1845
D200K	-4.19047
S113G	-4.19058
T236H	-4.19118
V231M	-4.19159
I202V	-4.19409
D160S	-4.19429
F250L	-4.19613
Y89S	-4.19724
E148R	-4.19752
F13I	-4.1976
T120D	-4.1998
F16Y	-4.20215
T72N	-4.20551
N194E	-4.20626
I301M	-4.20671
G28V	-4.20698
V257A	-4.21241
G26A	-4.21305
Y293L	-4.21502
T43H	-4.21537
F40A	-4.21642
T43S	-4.2172
H96V	-4.21776
E34D	-4.21834
M54I	-4.22017
H96R	-4.22078
S199K	-4.22159
K130I	-4.22163
P298A	-4.22228
D219N	-4.2228
R9D	-4.22449
S280F	-4.22949
T77M	-4.23036
I246Y	-4.23358
L75H	-4.23411
D133R	-4.23647
L134T	-4.23687
I87A	-4.23704
T115D	-4.24053
T36I	-4.24372
L75W	-4.24384
M66F	-4.24396
G105M	-4.24399
T39H	-4.2463
M54V	-4.24698
G242S	-4.24797
Q239D	-4.253
Y291S	-4.25435
I309E	-4.25651
S256Q	-4.25713
E85L	-4.2573
V33R	-4.25753
W15L	-4.25884
I50S	-4.25891
D100N	-4.25929
S240C	-4.26206
T39M	-4.26328
N42K	-4.26447
E34I	-4.26639
G242H	-4.26837
Q220P	-4.26941
E14C	-4.27078
S74V	-4.27179
I301L	-4.27266
Q128T	-4.27484
V33L	-4.27741
S27V	-4.28163
M146L	-4.28396
V193Y	-4.28641
E81P	-4.28769
D290E	-4.29069
G105A	-4.29292
T186S	-4.29336
F250V	-4.2976
V232Y	-4.30039
L244S	-4.30111
H102Q	-4.30173
M54A	-4.30327
S113A	-4.30376
P298G	-4.30404
A165I	-4.31552
F80E	-4.31568
D267R	-4.31726
Y179F	-4.31769
E259A	-4.31902
A10E	-4.32001
I301R	-4.32158
D76E	-4.32497
S224N	-4.32503
S74R	-4.32676
L244H	-4.32688
S294T	-4.32727
S224P	-4.32754
V226Y	-4.32799
L277R	-4.33431
S199H	-4.33466
I112L	-4.33501
D37E	-4.33921
T124R	-4.34093
A178K	-4.34295
T186P	-4.34595
S127D	-4.3476
E148Y	-4.3508
G94N	-4.35239
D147R	-4.35588
L266M	-4.35898
L134D	-4.35958
N299I	-4.36193
T186I	-4.3631
S131Q	-4.36518
K93Y	-4.36573
S273E	-4.3668
L62Q	-4.36709
L75N	-4.36738
G109S	-4.37353
A153H	-4.37437
A270Y	-4.3772
T39L	-4.37778
S149K	-4.37986
A78Y	-4.38234
N88R	-4.38349
F16G	-4.38647
A279Y	-4.38677
G28E	-4.38694
E81I	-4.38703
E148M	-4.38755
T39P	-4.38958
A78V	-4.39038
S283T	-4.39265
S149G	-4.39289
T187A	-4.39409
S131Y	-4.39714
L75S	-4.39858
E148L	-4.40026
G28R	-4.40283
T139L	-4.40695
N42G	-4.40903
Y108A	-4.41
N140M	-4.41038
E85P	-4.41306
Y108G	-4.41314
G214A	-4.41335
G26T	-4.41353
A270M	-4.41469
S308R	-4.4151
S123W	-4.41546
D145N	-4.41622
T77Y	-4.41633
T39E	-4.41795
S84Y	-4.41842
F16R	-4.42325
F57I	-4.42516
S280Y	-4.426
Y83V	-4.42655
T120I	-4.42741
H96D	-4.42757
M265A	-4.42843
A178M	-4.4302
L307S	-4.4309
N194Y	-4.43556
T120Q	-4.43781
I301Y	-4.43915
T196N	-4.44253
I46Y	-4.44361
T120E	-4.44375
D37N	-4.44583
L277E	-4.45772
S180G	-4.46092
P41I	-4.46255
L307R	-4.46742
D147K	-4.46801
K130L	-4.47054
T110F	-4.4713
F121L	-4.47285
A254T	-4.47336
T124S	-4.47461
Y293N	-4.47799
P68H	-4.47991
F80W	-4.48071
F173L	-4.48711
S180D	-4.49023
L244A	-4.49102
I292V	-4.49357
N272S	-4.4944
S84L	-4.49465
D117S	-4.49814
S273K	-4.49927
I292S	-4.49999
S113K	-4.501
T43R	-4.50123
S131H	-4.50187
L244G	-4.5072
F16K	-4.50804
V86Y	-4.51002
V226M	-4.511
Q228L	-4.51383
N255T	-4.51746
Q119V	-4.5178
K130P	-4.51885
S223D	-4.52622
T184H	-4.52688
T39K	-4.52923
M71Q	-4.52943
K93P	-4.53044
G82F	-4.53153
L62T	-4.53359
T39G	-4.53442
L244E	-4.53673
F13W	-4.5368
D160Q	-4.54035
W281Y	-4.5419
S123C	-4.54323
Q128Y	-4.54447
T115K	-4.54583
T115I	-4.55123
K243L	-4.55588
I48M	-4.55659
P41S	-4.55728
S224E	-4.56102
S199R	-4.56487
D200E	-4.56708
I48D	-4.56947
Q47N	-4.57335
F173W	-4.5735
L277W	-4.57355
T217G	-4.5746
S27I	-4.57501
G94K	-4.57541
T110P	-4.57682
K93E	-4.57688
G35D	-4.57845
T43F	-4.57952
D76Q	-4.58018
I50F	-4.58554
D117Q	-4.58572
L210F	-4.58763
T72A	-4.59023
T190R	-4.5948
D219K	-4.59495
P68A	-4.5953
A178I	-4.59661
I87T	-4.59681
T36R	-4.59706
L307Y	-4.59867
M295A	-4.59985
P298N	-4.6012
M146F	-4.60227
R9V	-4.60227
Q228T	-4.60575
S240P	-4.60705
N272H	-4.60774
Y268D	-4.61331
I30W	-4.61379
L277Y	-4.61521
E34T	-4.6185
S114T	-4.61999
I292Y	-4.62132
D145E	-4.62312
T77I	-4.62634
Y89D	-4.63003
M63L	-4.63032
E34M	-4.63053
Y306T	-4.63114
E263L	-4.63326
V152I	-4.63344
Y306L	-4.63368
S113L	-4.63497
T124A	-4.63514
D147Q	-4.63592
H144W	-4.63677
V203M	-4.63716
E148K	-4.63979
S113V	-4.64055
I30V	-4.64243
M146T	-4.64451
L244P	-4.64528
N42R	-4.64668
Q220R	-4.64732
P68T	-4.64784
T72D	-4.64949
D219L	-4.64956
Y108Q	-4.65091
T43I	-4.65488
Q239G	-4.65516
T120G	-4.65563
N189S	-4.6577
T186E	-4.6594
F40Y	-4.65948
T217R	-4.66437
P101V	-4.66476
P68L	-4.66722
V99P	-4.66755
Y188M	-4.66831
D211N	-4.66999
T43V	-4.67079
I56A	-4.67081
D290A	-4.6727
E205D	-4.67448
T139V	-4.67546
T196R	-4.67682
T190I	-4.67875
L201G	-4.67914
D160A	-4.68024
V152H	-4.68401
A45E	-4.68495
G92M	-4.68539
Q228P	-4.69102
T36Q	-4.69115
S199G	-4.69299
L307G	-4.69306
E229K	-4.69318
R9E	-4.69407
S199D	-4.6967
D100V	-4.69691
G28F	-4.70088
A254G	-4.70413
T190L	-4.70609
A45V	-4.7064
Y188C	-4.70732
G28L	-4.70768
V150F	-4.70837
A165N	-4.70897
M71P	-4.70939
K93F	-4.70947
G28Y	-4.71028
G28P	-4.71196
Q128M	-4.71231
T120N	-4.71247
S116Q	-4.71285
S240I	-4.71366
P60T	-4.71377
F16S	-4.71406
V33I	-4.71406
T187G	-4.71469
V152S	-4.71578
S11D	-4.71778
E85H	-4.72028
S283V	-4.7215
P297A	-4.72277
G214N	-4.72489
A279S	-4.72513
S149P	-4.72786
D233Q	-4.72845
T168N	-4.72898
I309Q	-4.73273
D117E	-4.73659
E259D	-4.73728
Q220W	-4.73783
T168S	-4.73877
I87M	-4.74211
T39D	-4.74241
A126S	-4.7465
A78I	-4.74715
T115Q	-4.74728
S114A	-4.75605
P68N	-4.75745
L134E	-4.76112
G245C	-4.76318
A78R	-4.7633
E34C	-4.76561
Q119I	-4.76892
I292W	-4.76929
L201Y	-4.77069
S280N	-4.77149
I46L	-4.77516
S127V	-4.77539
A95M	-4.78261
D200H	-4.78457
L307Q	-4.78623
D51T	-4.78667
I67H	-4.78678
E259F	-4.78762
L201A	-4.78776
E271V	-4.7879
Y291N	-4.7902
D147V	-4.79166
T115L	-4.79197
S280Q	-4.79358
S218N	-4.79475
N194R	-4.79482
W122F	-4.79544
L134M	-4.79646
T69I	-4.79662
D100Q	-4.79746
S27M	-4.80533
N88G	-4.80632
V203F	-4.80684
A254Q	-4.80758
T36S	-4.80934
E260M	-4.81091
L134C	-4.81242
I202F	-4.81623
N272D	-4.8164
T190F	-4.81763
P68Y	-4.81815
F250M	-4.81834
F25Y	-4.81848
T124L	-4.81968
I309M	-4.82565
M295T	-4.82594
G26N	-4.82608
S27C	-4.83188
E24D	-4.83298
F104A	-4.83362
I87F	-4.835
Q47R	-4.83618
S116K	-4.8368
Y303F	-4.83858
S180Q	-4.83866
N88A	-4.84253
L49Y	-4.85059
H96L	-4.85246
H96A	-4.85365
S84H	-4.85451
A97I	-4.85696
F104S	-4.85789
L201S	-4.86275
T43M	-4.863
T217N	-4.8645
T44V	-4.86454
F16W	-4.86505
A78F	-4.86631
L49W	-4.86707
P60S	-4.86862
A254R	-4.86928
F129L	-4.86959
T190M	-4.87107
D160E	-4.87142
S27H	-4.87282
V257L	-4.87372
F80R	-4.8807
T44I	-4.88092
S127H	-4.88121
T120H	-4.886
T39N	-4.88762
D290G	-4.8893
T44Y	-4.89012
G26S	-4.89238
L266V	-4.89264
T217K	-4.89414
Q228N	-4.89898
D100T	-4.90072
M146A	-4.90121
Y306F	-4.90122
T77F	-4.90263
L75K	-4.90496
G214Y	-4.9058
M71G	-4.90676
L244F	-4.90706
D219R	-4.90734
Y268E	-4.90812
L134F	-4.90894
P101L	-4.91083
F173T	-4.91087
W281F	-4.9114
G82I	-4.91364
K130M	-4.91954
Y291D	-4.91961
G82T	-4.92001
M295C	-4.92073
L201Q	-4.92221
M265E	-4.92222
V257S	-4.92252
E85M	-4.9228
V86N	-4.92379
I50G	-4.92541
I301F	-4.92793
T124Q	-4.92906
I292P	-4.93345
Q47P	-4.93387
S21P	-4.93409
Q128W	-4.93411
N55T	-4.93471
L244D	-4.93765
S12M	-4.93783
I202Y	-4.93972
S131L	-4.94039
S218A	-4.94248
L266F	-4.94534
D164P	-4.94722
Y306Q	-4.95115
A254I	-4.95192
E85F	-4.9534
S27R	-4.95376
N194L	-4.95496
W287M	-4.95528
I301H	-4.95893
N88V	-4.96032
I56M	-4.96154
V222A	-4.96272
N194H	-4.96362
T110C	-4.96813
D164F	-4.96906
E34Q	-4.97021
F80C	-4.97038
T217A	-4.9714
A153C	-4.97374
I112F	-4.97403
V231F	-4.97441
Y108H	-4.97487
V257G	-4.97681
A10I	-4.98084
S256R	-4.98134
S84M	-4.98143
K93D	-4.98217
W281L	-4.98391
I309P	-4.98413
T196E	-4.98464
S131F	-4.98466
S127I	-4.99033
G242E	-4.99186
H96E	-4.99594
A158S	-4.99949
E271M	-5.00382
T44W	-5.00471
V99M	-5.005
L266I	-5.0062
S12F	-5.00781
I309Y	-5.00831
V152N	-5.00911
A10M	-5.00937
D76V	-5.01239
T124H	-5.01503
E259S	-5.01609
M265G	-5.01741
L195F	-5.01767
G82V	-5.01856
G92P	-5.01959
S18C	-5.02183
Y89Q	-5.02277
A95L	-5.02546
S11E	-5.02625
R9H	-5.02796
D100C	-5.0286
A52C	-5.02947
V257I	-5.03031
R9L	-5.03262
T124E	-5.03959
A10H	-5.03986
D100S	-5.04212
E259H	-5.04319
L277D	-5.0441
G166N	-5.04785
T186L	-5.04816
Y108E	-5.04829
A45H	-5.04922
D147L	-5.04966
F57L	-5.05149
V99W	-5.05517
P101I	-5.05526
P41N	-5.05796
N194W	-5.06018
V135I	-5.06038
S283C	-5.06083
D219I	-5.06198
S149R	-5.06202
L247M	-5.06264
F13V	-5.06343
K130C	-5.06491
A279L	-5.06712
T235V	-5.06732
A157G	-5.06814
A95I	-5.06861
T187L	-5.06974
Y293P	-5.0714
G264S	-5.072
L269A	-5.07313
S308L	-5.07322
L201D	-5.07367
Y171T	-5.07744
F118Y	-5.07883
G248S	-5.07941
V59F	-5.0806
A254K	-5.08328
A45N	-5.08403
M71A	-5.0863
G28H	-5.08639
Y268V	-5.08674
T115E	-5.08848
D117T	-5.09045
N132D	-5.09084
T236P	-5.09325
D76R	-5.09707
S283L	-5.09751
N194P	-5.09917
T236M	-5.10021
D138G	-5.10109
S116G	-5.10277
F173M	-5.10305
S273R	-5.10387
Y293V	-5.1092
A254H	-5.10979
K130D	-5.10991
S294D	-5.1116
E148W	-5.1128
D160L	-5.11304
D160R	-5.11319
Y108T	-5.11321
D100G	-5.11424
P68D	-5.11648
S113R	-5.11725
A302Q	-5.11768
Y268L	-5.11862
F129W	-5.12104
G28I	-5.12256
G73N	-5.12343
T69Y	-5.12354
A78H	-5.12441
S308V	-5.12487
Y293I	-5.12751
Q220M	-5.12944
I46M	-5.13044
T124I	-5.13303
L244Y	-5.13327
F173A	-5.13477
T36E	-5.1397
F16H	-5.14235
P41V	-5.14236
V174P	-5.14248
N19T	-5.1455
F40D	-5.14672
L201F	-5.15119
F40L	-5.15152
M71F	-5.15352
P298V	-5.15364
W287F	-5.15458
T187R	-5.15464
A45G	-5.15504
G264N	-5.15554
G252V	-5.15563
G22S	-5.15696
S131R	-5.15765
T77H	-5.16008
I56S	-5.16321
Q228D	-5.16346
Q128F	-5.16385
G92F	-5.16579
T39W	-5.16693
S149V	-5.16711
I90L	-5.16851
S27L	-5.16864
Q228I	-5.1697
A279H	-5.17066
I309D	-5.17096
S240F	-5.17129
T120V	-5.17176
Y89R	-5.17202
F61Y	-5.17346
V152W	-5.17348
I30T	-5.17356
T186K	-5.17688
G94D	-5.17819
A254L	-5.17907
I301W	-5.18066
I292L	-5.18162
Y108V	-5.1817
D200Q	-5.18271
Q119C	-5.18532
K130E	-5.18606
Y89N	-5.18807
Y108P	-5.19015
I136L	-5.19094
V222T	-5.19191
N241H	-5.19245
S256K	-5.19296
D233F	-5.19309
S199M	-5.19342
M146S	-5.19375
E20L	-5.19606
A10F	-5.19834
E271H	-5.19867
T69H	-5.20024
V151T	-5.20251
T115R	-5.20265
L75G	-5.20456
E34R	-5.20486
A45Y	-5.2084
V152E	-5.20939
M146P	-5.20982
S256G	-5.21252
L277F	-5.21297
S180M	-5.21629
N194V	-5.21966
Y171W	-5.22009
A157K	-5.22157
S224Q	-5.22162
F13P	-5.22411
Q119N	-5.22563
Y268Q	-5.22566
F121Y	-5.2272
S280G	-5.22906
S113Q	-5.22988
W183H	-5.23088
G109E	-5.23207
S131P	-5.23627
F16Q	-5.23833
D76H	-5.23927
G105L	-5.23978
V86M	-5.24024
Q228G	-5.24129
F118L	-5.24157
L125A	-5.24302
S283D	-5.248
N177S	-5.24846
T69M	-5.24945
S84G	-5.24969
D290K	-5.25095
N140Q	-5.25331
Q208L	-5.25584
T217Q	-5.25668
S149L	-5.25771
A284S	-5.25849
G53K	-5.26016
Q239P	-5.26023
D233I	-5.26035
A270I	-5.26095
D290P	-5.26236
E271Y	-5.268
F80G	-5.27012
S294L	-5.27023
E260H	-5.27039
L201P	-5.27255
A167S	-5.27425
D145Q	-5.27609
F40I	-5.27628
E24A	-5.27787
V99C	-5.27941
A78M	-5.28081
D76T	-5.28111
I56F	-5.2817
F13T	-5.28235
M295Q	-5.28238
L195V	-5.28332
I90A	-5.28776
A52Y	-5.29092
V151I	-5.29145
N255S	-5.29393
D147M	-5.29456
V59M	-5.29521
V257K	-5.29711
L75E	-5.29901
V232H	-5.30017
T115G	-5.30275
A302D	-5.30684
G28M	-5.30698
T184N	-5.31119
M192P	-5.31264
Q128G	-5.31334
E85I	-5.31711
N241T	-5.31725
F104G	-5.31745
G92I	-5.31791
A45L	-5.31839
S11F	-5.32025
T184K	-5.32061
R9C	-5.3215
S18H	-5.32162
G73T	-5.32479
P41T	-5.32502
D290R	-5.32627
M71T	-5.32828
G300D	-5.32846
E205H	-5.32905
I246W	-5.33133
A153F	-5.3323
F40T	-5.33359
[truncated: 3,587 more rows]
