# Supplementary material for: Exploring sequence- and structure-based fitness landscapes to enhance thermal resistance and activity of endoglucanase II with minimal experimental effort
Source: RSC Chem Biol. 2025 May 5;6(6):975–86. doi: 10.1039/d5cb00013k (PMC12080268; doi:10.1039/d5cb00013k)
Supplement: CB-006-D5CB00013K-s003 [file CB-006-D5CB00013K-s003.xlsx]

## Sheet: Sheet1
Predicted EGLII variants	ΔΔG (mean of 5 runs)	Standard deviation	Standard error of the mean
D138N	-5.35134	0.0389143	0.017403
D138C	-4.3423	0.0327073	0.0146271
E205M	-4.31656	0.173233	0.0774723
D138L	-4.14257	0.00976358	0.0043664
E20M	-4.04121	0.602254	0.269336
E205C	-4.01418	0.0229686	0.0102719
D138V	-3.93976	0.830448	0.371388
E205Q	-3.93179	0.134632	0.0602095
E205L	-3.86827	0.0313866	0.0140365
S280L	-3.77885	0.661644	0.295896
S280M	-3.76911	0.00509269	0.00227752
D138A	-3.61823	0.0245763	0.0109909
D138S	-3.59669	0.0774442	0.0346341
E20L	-3.36212	0.502084	0.224539
G181R	-3.32464	0.542478	0.242603
S114D	-3.32462	0.0303135	0.0135566
D138T	-3.1995	0.204002	0.0912326
E175M	-3.0868	0.649319	0.290385
E205A	-3.04501	0.0103791	0.00464167
E20I	-2.83505	0.558657	0.249839
E205N	-2.63991	0.0125014	0.00559081
T43L	-2.6353	0.0109425	0.00489366
E205T	-2.62697	0.0123142	0.0055071
H96F	-2.57894	0.00787722	0.0035228
N42D	-2.57571	0.0176977	0.00791466
E205S	-2.52726	0.249913	0.111764
E175L	-2.48652	0.0756602	0.0338362
E175Q	-2.41914	0.532568	0.238172
E175C	-2.39755	0.0439166	0.0196401
T43P	-2.38544	0.0103364	0.0046226
Q289G	-2.35884	0.059164	0.026459
D138G	-2.35317	0.0245634	0.0109851
T184F	-2.32947	0.00893091	0.00399402
G264R	-2.32814	0.586204	0.262158
T184R	-2.30627	0.552088	0.246901
T184L	-2.24824	0.0102482	0.00458314
E296L	-2.23173	0.1396	0.062431
H96Y	-2.21983	0.00543884	0.00243232
G181F	-2.19501	0.0488098	0.0218284
E205V	-2.1782	0.112982	0.0505273
T190F	-2.17002	0.0126512	0.00565779
E175A	-2.09453	0.04273	0.0191094
E296M	-2.09324	0.256952	0.114912
S218F	-2.09297	0.0400363	0.0179048
T184M	-2.09069	0.0206678	0.0092429
T184I	-2.07892	0.236401	0.105722
T184Y	-2.05789	0.0208823	0.00933885
E175T	-2.04867	0.0611478	0.0273461
G181M	-2.04568	0.0463604	0.020733
S212P	-2.02468	0.225653	0.100915
E311L	-2.02464	0.107209	0.0479451
D138Q	-2.01391	1.5846	0.708654
E311K	-1.99494	0.0885664	0.0396081
Q208L	-1.9874	0.0299696	0.0134028
S116E	-1.94108	0.0344407	0.0154024
S84K	-1.9384	0.013725	0.00613802
E296K	-1.93296	0.0880777	0.0393896
D100C	-1.91749	0.0529905	0.0236981
S12K	-1.88643	0.0200382	0.00896136
T115P	-1.88587	0.0186378	0.0083351
E175S	-1.88462	0.0311964	0.0139515
S218Y	-1.88034	0.00863395	0.00386122
E311M	-1.87948	0.0363297	0.0162471
E311R	-1.87936	0.0501215	0.022415
E20V	-1.87813	0.356737	0.159538
G181W	-1.87416	0.0525754	0.0235124
S12M	-1.87059	0.051159	0.022879
G264L	-1.86466	0.0319497	0.0142883
S84M	-1.85648	0.0360138	0.0161058
E205I	-1.85523	0.0120941	0.00540866
S283G	-1.85167	0.00101583	0.000454295
A45F	-1.83712	0.119975	0.0536546
T190Y	-1.82458	0.0531272	0.0237592
S84I	-1.81742	0.0105353	0.00471154
D213R	-1.81055	0.124934	0.055872
S256P	-1.79054	0.00951536	0.0042554
N88M	-1.7859	0.00312756	0.00139869
N88Y	-1.77202	0.00776083	0.00347075
S113M	-1.76783	0.080015	0.0357838
G264H	-1.76153	0.0442486	0.0197886
G181L	-1.75876	0.0401436	0.0179528
S12R	-1.75216	0.00651456	0.0029134
N88F	-1.74651	0.00286338	0.00128054
S280I	-1.73656	0.00220777	0.000987343
E296R	-1.73468	0.607804	0.271818
T124I	-1.73199	0.000742247	0.000331943
T184W	-1.72015	0.00769692	0.00344217
Q208M	-1.68699	0.20619	0.0922111
T77P	-1.68688	0.00269424	0.0012049
E20R	-1.67712	0.341474	0.152712
S84R	-1.67065	0.455113	0.203533
N88R	-1.66827	0.418057	0.186961
S280C	-1.66339	0.000111041	4.96588e-05
E263M	-1.66169	0.0230974	0.0103295
E20C	-1.65792	0.630846	0.282123
S308P	-1.65409	0.0373195	0.0166898
G181Y	-1.65054	0.0512208	0.0229066
T184K	-1.63898	0.128723	0.0575666
G264M	-1.63729	0.0305997	0.0136846
D100T	-1.6312	0.0946019	0.0423073
E175G	-1.59639	0.0328872	0.0147076
G264K	-1.59303	0.312243	0.139639
A45Y	-1.59145	0.133251	0.0595917
G264F	-1.56424	0.060249	0.0269442
E14M	-1.56186	0.026401	0.0118069
E175V	-1.56075	0.0670594	0.0299899
D233P	-1.5594	0.0209673	0.00937685
E259M	-1.55667	0.0857149	0.0383329
T184V	-1.54377	0.00888272	0.00397247
D138I	-1.54144	0.466778	0.208749
E205G	-1.53258	0.0111883	0.00500355
E263L	-1.52365	0.0183785	0.00821912
S256E	-1.51646	0.030842	0.013793
D117M	-1.50726	0.0412684	0.0184558
A254P	-1.50396	0.0131934	0.00590028
E271R	-1.49562	0.27611	0.12348
N88L	-1.49413	0.0216178	0.00966779
D219P	-1.48098	0.0327287	0.0146367
T43M	-1.47166	0.080751	0.036113
D164R	-1.45979	0.108501	0.0485232
T184Q	-1.45301	0.0193648	0.00866019
S224L	-1.44859	0.154342	0.0690238
S224M	-1.44298	0.0360161	0.0161069
Q289K	-1.44183	0.0635489	0.0284199
E296T	-1.43811	0.000293292	0.000131164
E259K	-1.43195	0.575562	0.257399
G181Q	-1.42941	0.0920741	0.0411768
T124L	-1.42298	0.048438	0.0216621
T184E	-1.42261	0.46665	0.208692
D117L	-1.42181	0.0284596	0.0127275
N255D	-1.41893	0.89284	0.39929
T124M	-1.41765	0.0216273	0.00967202
T115E	-1.41709	0.011004	0.00492115
E175N	-1.40971	0.346907	0.155141
E205K	-1.38988	0.588578	0.26322
D100A	-1.38742	0.12603	0.0563625
D138M	-1.38677	0.875597	0.391579
S113F	-1.38128	0.00882122	0.00394497
V193R	-1.38044	0.0296487	0.0132593
A178F	-1.3773	0.0529562	0.0236827
E271H	-1.37049	0.0393147	0.0175821
V150L	-1.36972	0.0327429	0.0146431
D274M	-1.36759	0.189704	0.0848383
D100S	-1.36742	0.099977	0.0447111
T217R	-1.35861	0.0398144	0.0178055
E259L	-1.35751	0.465988	0.208396
E296C	-1.35742	0.000550436	0.000246163
A178N	-1.34937	0.00588478	0.00263175
T168K	-1.34161	0.022888	0.0102358
S84V	-1.33895	0.0159477	0.00713201
S18V	-1.33364	0.0434422	0.019428
A178H	-1.3325	0.0761233	0.0340434
T187K	-1.32698	0.0409421	0.0183099
G181H	-1.30002	0.336797	0.15062
D274L	-1.29946	0.0236071	0.0105574
T168R	-1.29262	0.0523547	0.0234137
T190P	-1.2835	0.00579528	0.00259173
D160F	-1.28327	0.19711	0.0881502
T184H	-1.27959	0.0429455	0.0192058
D267F	-1.27224	0.197156	0.0881707
T115L	-1.26878	0.00919468	0.00411199
D51F	-1.26844	0.0880298	0.0393681
E263K	-1.26709	0.0716399	0.0320383
S256D	-1.26098	0.0233791	0.0104555
E296F	-1.25909	0.52205	0.233468
N88K	-1.2544	0.0269203	0.0120391
V257E	-1.25321	0.0630934	0.0282162
T115M	-1.24851	0.0563455	0.0251985
G264Y	-1.24666	0.0964911	0.0431521
D164M	-1.24643	0.00401977	0.00179769
S218R	-1.24502	0.356496	0.15943
D164K	-1.24394	0.0696364	0.0311424
T44D	-1.23016	0.433762	0.193984
S224P	-1.2299	0.0565297	0.0252808
A191M	-1.2122	0.0229798	0.0102769
E175I	-1.20633	0.168403	0.0753123
A45L	-1.20599	0.00555181	0.00248285
Q289S	-1.20268	0.0626709	0.0280273
D164L	-1.20244	0.0480441	0.021486
Q239K	-1.19967	0.0477126	0.0213377
E259I	-1.19901	0.0884195	0.0395424
D138K	-1.19718	0.77467	0.346443
T36R	-1.19627	0.190336	0.0851209
E296I	-1.19441	0.0097033	0.00433945
H96M	-1.18816	0.0844748	0.0377783
T43I	-1.17731	0.0319807	0.0143022
E271K	-1.16916	0.0153697	0.00687352
D274K	-1.16494	0.0604158	0.0270187
S280V	-1.16261	0.0033878	0.00151507
S305F	-1.15676	0.0300867	0.0134552
S123L	-1.15661	0.0584868	0.0261561
T168M	-1.14831	0.00542532	0.00242628
S12L	-1.14808	0.318757	0.142552
T168L	-1.14439	0.00628213	0.00280945
E14W	-1.14194	0.0135487	0.00605916
E296Y	-1.13856	0.819102	0.366313
E311Q	-1.1362	0.0197265	0.00882195
I309M	-1.12987	0.330818	0.147946
E14P	-1.12373	0.0303427	0.0135697
E14L	-1.12199	0.0239156	0.0106954
D164Q	-1.10674	0.0129295	0.00578226
D51M	-1.10264	0.11508	0.0514654
D117F	-1.09627	0.0150884	0.00674772
S308K	-1.09385	0.221911	0.0992418
S123R	-1.0937	0.103843	0.0464401
E263I	-1.08927	0.0184329	0.00824347
D233R	-1.07047	0.718595	0.321366
E263F	-1.07027	0.0337659	0.0151006
T217Q	-1.0695	0.0189537	0.00847633
T44E	-1.06931	0.110266	0.0493123
A178Y	-1.06855	0.351703	0.157287
S12A	-1.06464	0.000813099	0.000363629
D164A	-1.06303	0	0
T217K	-1.06156	0.065561	0.0293198
T187E	-1.06051	0.0583003	0.0260727
A45M	-1.05979	0.0119093	0.005326
A191L	-1.05902	0.000993594	0.000444349
T77M	-1.0571	0.0486151	0.0217413
T124F	-1.05404	0.0582893	0.0260677
V150M	-1.05349	0.0660935	0.0295579
T124R	-1.05109	0.0894262	0.0399926
V232T	-1.05044	5.02991e-05	2.24944e-05
G264N	-1.04831	0.0111093	0.00496824
S116D	-1.0469	0.0986589	0.0441216
G181T	-1.04481	0.0130058	0.00581636
S84A	-1.04467	0.000538953	0.000241027
Q239R	-1.04123	0.171821	0.0768408
E263Y	-1.0399	0.266845	0.119337
D164H	-1.03856	0.0512769	0.0229317
A178K	-1.03681	0.0115962	0.00518599
E296A	-1.03181	0	0
G264A	-1.02884	0	0
S113Y	-1.02818	0.0254474	0.0113804
E34P	-1.02736	0.00302186	0.00135142
I301P	-1.0263	0.0132117	0.00590844
S212L	-1.02403	0.0125183	0.00559834
S123K	-1.02399	0.225108	0.100672
T120L	-1.02156	0.0231726	0.0103631
S27P	-1.01958	0.200971	0.0898768
S224K	-1.01904	0.0389488	0.0174184
A178Q	-1.01094	0.00275272	0.00123105
T124Q	-1.00904	0.0334656	0.0149663
D117R	-1.0084	0.399393	0.178614
T187R	-1.00831	0.0291333	0.0130288
T187L	-1.00679	0.00101876	0.000455605
T190W	-1.00363	0.0642446	0.0287311
T124K	-1.00107	0.0574321	0.0256844
N88W	-1.00038	0.0424569	0.0189873
E175P	-0.997542	0.0469043	0.0209762
E85M	-0.997086	0.0833449	0.037273
F129W	-0.996143	0.166691	0.0745467
S212M	-0.994171	0.0130689	0.00584457
D200G	-0.991089	0.000271906	0.0001216
D164N	-0.989305	0.00103751	0.000463989
S212W	-0.989047	0.0244364	0.0109283
T190D	-0.981189	0.00703585	0.00314653
D51Y	-0.98049	0.131619	0.0588618
T187Q	-0.980481	0.00799222	0.00357423
G264I	-0.980443	0.0816139	0.0364988
S305R	-0.971711	0.140034	0.0626251
T217F	-0.970704	0.231762	0.103647
S305M	-0.968933	0.0746192	0.0333707
T120I	-0.967069	0.0154008	0.00688744
E263R	-0.964168	0.181082	0.0809825
G264T	-0.963522	0.0814986	0.0364473
D274R	-0.960849	0.0171053	0.00764972
I50M	-0.957678	0.0577204	0.0258133
T120K	-0.947996	0.0620395	0.0277449
T187M	-0.946204	0.0287798	0.0128707
G181K	-0.942954	0.199782	0.0893452
G264W	-0.93417	0.0462926	0.0207027
S12F	-0.933572	0.104437	0.0467058
S218K	-0.932674	0.0693716	0.0310239
E85Y	-0.931681	0.0220699	0.00986994
A254M	-0.922548	0.0523738	0.0234223
T44M	-0.918807	0.0273405	0.012227
D117W	-0.917475	0.0972351	0.0434849
S256Q	-0.912827	0.0769811	0.034427
K93N	-0.912506	0.12107	0.0541442
S305H	-0.911755	0.0385512	0.0172406
N88Q	-0.911524	0.00153474	0.000686359
T120F	-0.91106	0.0420273	0.0187952
S123M	-0.910128	0.0594083	0.0265682
T69R	-0.907435	0.049203	0.0220043
G28K	-0.905659	0.0164557	0.00735923
S12Q	-0.900525	0.0124511	0.00556829
T120R	-0.899774	0.0590127	0.0263913
D160Y	-0.899071	0.134759	0.0602662
S305L	-0.895472	0.0781276	0.0349397
G264Q	-0.89168	0.140746	0.0629437
Q239L	-0.891518	0.0134867	0.00603143
E14K	-0.890869	0.0650502	0.0290913
T190M	-0.88954	0.0175272	0.00783841
S212Q	-0.888461	0.0308605	0.0138012
T120M	-0.886121	0.0764677	0.0341974
N42E	-0.879703	0.139115	0.0622139
D117K	-0.879435	0.0208281	0.00931461
T217N	-0.877328	0.328899	0.147088
D51K	-0.877296	0.3428	0.153305
S199C	-0.87651	0.00261633	0.00117006
D133P	-0.875913	0.0138699	0.00620281
S212E	-0.87268	0.0907714	0.0405942
D160L	-0.868111	0.0498633	0.0222996
D274I	-0.867017	0.0307675	0.0137596
E20Q	-0.865801	0.258582	0.115641
A178L	-0.864247	0.0364124	0.0162841
G181A	-0.863519	0.0287277	0.0128474
Q119M	-0.862919	0.0287364	0.0128513
G28R	-0.86009	0.135165	0.0604478
Q239F	-0.859117	0.0275922	0.0123396
E296N	-0.856926	0.30513	0.136458
T43K	-0.855591	0.104987	0.0469517
S27R	-0.854767	0.228809	0.102327
S305Y	-0.850443	0.0243534	0.0108912
V193K	-0.849559	0.0184254	0.00824007
T186P	-0.848168	0.0620155	0.0277342
A52K	-0.848136	0.115254	0.0515432
D164W	-0.848078	0.0546462	0.0244385
S280A	-0.846551	0	0
T190R	-0.845083	0.106471	0.0476153
S114E	-0.842876	0.432059	0.193223
D164F	-0.842779	0.0237558	0.0106239
S280K	-0.840884	0.335307	0.149954
D51W	-0.837356	0.307583	0.137555
T44W	-0.835152	0.0151366	0.00676931
T169E	-0.83107	0.0475486	0.0212644
D100V	-0.828723	0.0713523	0.0319097
A52R	-0.827438	0.0554817	0.0248122
T43Q	-0.826661	0.153528	0.0686599
Q239M	-0.82573	0.104397	0.0466879
E296S	-0.823387	5.16236e-05	2.30868e-05
T120Y	-0.821468	0.0221726	0.00991587
T217H	-0.820985	0.0468643	0.0209584
S113W	-0.8208	0.00744396	0.00332904
A191I	-0.820312	0.019564	0.0087493
T187C	-0.818738	2.30868e-05	1.03247e-05
S12Y	-0.817803	0.00718208	0.00321193
S212F	-0.813021	0.000969236	0.000433456
S218H	-0.807212	0.0384318	0.0171872
D117Y	-0.8023	0.00621219	0.00277818
D160M	-0.799136	0.140718	0.0629311
T124V	-0.798974	0.00341353	0.00152658
D117Q	-0.792712	0.0188932	0.00844932
T77E	-0.79258	0.0213212	0.00953511
S149M	-0.792393	0.0336042	0.0150283
E271L	-0.789736	0.00458939	0.00205244
I292P	-0.788973	0.0710444	0.031772
V231M	-0.788021	0.122251	0.0546724
D164Y	-0.786996	0.00601765	0.00269118
S11G	-0.785045	0	0
F104Y	-0.782637	0.00597337	0.00267137
E34M	-0.782617	0.0856897	0.0383216
T169M	-0.782576	0.0170956	0.0076454
S27M	-0.781445	0.028319	0.0126646
N241F	-0.776929	0.00545138	0.00243793
S27L	-0.775406	0.0010535	0.000471138
N55R	-0.773175	0.106151	0.047472
T169P	-0.769374	0.0339524	0.015184
A78P	-0.768566	0.0274818	0.0122902
A23P	-0.762968	0.0137682	0.00615732
V262M	-0.762337	0.422063	0.188753
T72L	-0.761593	0.105715	0.047277
T190Q	-0.759043	0.178212	0.0796989
S256F	-0.756277	0.137548	0.0615131
L307M	-0.75567	0.0318376	0.0142382
S212K	-0.754441	0.0258313	0.0115521
T44Q	-0.754105	0.00729563	0.00326271
D51L	-0.753334	0.170637	0.0763111
S294C	-0.752471	0.00358362	0.00160264
E263W	-0.752173	0.0281525	0.0125902
S84L	-0.752025	0.903773	0.40418
A52M	-0.75097	0.0476158	0.0212944
T190K	-0.750397	0.0359376	0.0160718
E148M	-0.748819	0.0536668	0.0240005
T36Q	-0.74804	0.00458497	0.00205046
S224E	-0.745333	0.039679	0.017745
T77D	-0.743664	0.0355583	0.0159021
S149W	-0.741819	0.00436747	0.00195319
A178M	-0.74123	0.0664428	0.0297141
S308R	-0.739431	0.0351839	0.0157347
T69Q	-0.738667	0.0153677	0.00687265
S240R	-0.733662	0.0379735	0.0169823
S212Y	-0.732989	0.000978133	0.000437435
T115Q	-0.732335	0.0229598	0.0102679
Q119L	-0.729412	0.0475278	0.0212551
D164T	-0.728967	0.00871837	0.00389897
S224Q	-0.727251	0.0587639	0.02628
T69F	-0.725917	0.0716687	0.0320512
D267Y	-0.724936	0.0724904	0.0324187
E271M	-0.724474	0.00901078	0.00402974
E311N	-0.723818	0.0273289	0.0122219
S149Q	-0.723441	0.00465604	0.00208224
T69G	-0.722656	0.0493728	0.0220802
E271A	-0.719989	0.00503215	0.00225044
V98I	-0.719083	0.00548392	0.00245248
D160K	-0.71852	0.0453984	0.0203028
D219F	-0.718259	0.0323977	0.0144887
T72Q	-0.717466	0.133269	0.0595999
S224R	-0.714419	0.0400059	0.0178912
S256I	-0.713829	0.0369645	0.016531
A191P	-0.71295	0.0496646	0.0222107
E85F	-0.712479	0.00284565	0.00127261
S84C	-0.7122	0.0108478	0.00485128
T186M	-0.711521	0.0128114	0.00572942
T77W	-0.711023	0.019966	0.00892908
T196F	-0.709586	0.0637814	0.0285239
T190L	-0.709062	0.00256676	0.00114789
T69Y	-0.708824	0.0314965	0.0140857
T190E	-0.707784	0.0465206	0.0208046
T120H	-0.707713	0.0185153	0.00828028
S240K	-0.703217	0.149929	0.0670502
H144F	-0.70245	0.663526	0.296738
T169Q	-0.698455	0.0409521	0.0183143
E271W	-0.697294	0.00391565	0.00175113
A52I	-0.694243	0.0658458	0.0294471
D164S	-0.693548	0.0550857	0.0246351
T190I	-0.692537	0.00160862	0.000719397
T72R	-0.692179	0.309578	0.138447
E271F	-0.687632	0.00292376	0.00130755
G28Q	-0.687079	0.0385229	0.017228
T115R	-0.686227	0.0166595	0.00745034
T217I	-0.68558	0.0616154	0.0275553
D274W	-0.684142	0.0378049	0.0169069
T115K	-0.682815	0.0432082	0.0193233
E20N	-0.682427	0.62019	0.277357
T236M	-0.682385	0.0456223	0.0204029
T120N	-0.682383	0.0186311	0.00833209
I309L	-0.68214	0.0356147	0.0159274
T43E	-0.681949	0.100333	0.0448703
V257L	-0.681407	0.0354909	0.015872
T69M	-0.678978	0.0294216	0.0131577
S212R	-0.678654	0.0161021	0.00720108
G264S	-0.67616	0.00248995	0.00111354
E271N	-0.675835	0.0348557	0.0155879
E296Q	-0.675389	0.199806	0.0893558
D160I	-0.672894	0.0422738	0.0189054
S27F	-0.668124	0.144462	0.0646054
T186L	-0.66398	0.0435892	0.0194937
A191F	-0.663551	0.179195	0.0801385
E81L	-0.659605	0.00494532	0.00221161
D200K	-0.659533	0.00715119	0.00319811
E85W	-0.656873	0.0105024	0.00469682
Q47M	-0.654702	0.0993131	0.0444141
Q228L	-0.654262	0.00159934	0.000715246
Q119K	-0.652057	0.0394789	0.0176555
S256K	-0.651746	0.0216113	0.00966486
T184N	-0.649578	0.011762	0.00526013
D274P	-0.647414	0.00342642	0.00153234
A45K	-0.647237	0.107337	0.0480025
E14I	-0.645092	0.0404439	0.0180871
D51R	-0.644789	0.107618	0.0481283
T69W	-0.644376	0.0257065	0.0114963
N88E	-0.642359	0.0177329	0.00793039
E20A	-0.641639	0.622512	0.278396
D117E	-0.637701	0.0363537	0.0162579
V86I	-0.637693	0.00748131	0.00334574
W183L	-0.637617	0.0665545	0.0297641
Q128M	-0.636267	0.0544853	0.0243666
A191K	-0.635905	0.0521163	0.0233071
S305W	-0.63411	0.27865	0.124616
T43V	-0.633208	0.000576911	0.000258003
S113N	-0.628925	0.00321087	0.00143595
S199M	-0.627929	0.241676	0.108081
N241Y	-0.627326	0.00431009	0.00192753
S212I	-0.626998	0.0481789	0.0215463
T120Q	-0.625661	0.0578494	0.0258711
D219Y	-0.625212	0.0266338	0.011911
S12C	-0.620761	0.00977796	0.00437284
H96L	-0.617203	0.256209	0.11458
E296W	-0.614417	0.0620967	0.0277705
D219L	-0.613632	0.322935	0.144421
S127K	-0.612518	0.0993351	0.044424
V232F	-0.608642	0.0170794	0.00763816
A52H	-0.6084	0.0852043	0.0381045
T196Y	-0.607426	0.0785956	0.035149
T184A	-0.60308	0.124291	0.0555846
E70K	-0.599889	0.0471611	0.0210911
E271Y	-0.598596	0.00543479	0.00243051
D267M	-0.596452	0.215013	0.0961567
S256L	-0.594556	0.133511	0.0597079
D219K	-0.594493	0.0710472	0.0317733
T187H	-0.594342	0.0102549	0.00458611
T124Y	-0.5942	0.0580695	0.0259695
T169A	-0.593562	0.0363355	0.0162497
S308I	-0.589939	0.0467103	0.0208895
S305K	-0.587923	0.0708782	0.0316977
T217L	-0.586983	0.0864555	0.0386641
S84Q	-0.586002	0.068507	0.0306373
E34I	-0.584303	0.0771269	0.0344922
D267K	-0.58251	0.0803111	0.0359162
E259V	-0.582252	0.329114	0.147184
T184C	-0.581306	0.0104145	0.00465749
T217Y	-0.579343	0.387285	0.173199
T187S	-0.578374	0.00402173	0.00179857
I309P	-0.574098	0.0515334	0.0230464
N88T	-0.573135	0.00238379	0.00106606
S149E	-0.571775	0.00651201	0.00291226
T124H	-0.571675	0.0117378	0.00524929
T44F	-0.569971	0.00469828	0.00210114
E148D	-0.567497	0.125116	0.0559535
N88A	-0.566415	0	0
T110F	-0.56512	0.00792987	0.00354635
T115I	-0.565113	0.00480101	0.00214708
G181I	-0.564154	0.255903	0.114443
E304M	-0.563822	0.0886111	0.0396281
S256M	-0.562953	0.0553772	0.0247654
Q228M	-0.562748	0.0520579	0.023281
A95M	-0.558611	0.128941	0.0576641
T196W	-0.558588	0.0303696	0.0135817
G28F	-0.558533	0.077332	0.0345839
E14F	-0.557014	0.0445751	0.0199346
T77L	-0.555504	0.00909645	0.00406806
Y179R	-0.553048	0.278282	0.124452
E70R	-0.549928	0.0443567	0.0198369
V232Y	-0.549573	0.0168685	0.00754382
D117A	-0.548902	4.91935e-06	2.2e-06
S12I	-0.547779	0.0993535	0.0444323
G181N	-0.547455	0.0492999	0.0220476
D51I	-0.546649	0.189008	0.0845272
S218Q	-0.546438	0.0137669	0.00615674
D213K	-0.546165	0.200863	0.0898287
T72M	-0.545164	0.0517268	0.0231329
H96W	-0.545124	0.0070858	0.00316887
D160W	-0.543569	0.0766884	0.0342961
T169W	-0.542528	0.0225234	0.0100728
D290F	-0.542231	0.0704345	0.0314993
V59I	-0.542069	0.0174766	0.00781577
T77I	-0.542049	0.0181258	0.00810611
T36K	-0.541288	0.0790266	0.0353418
D219R	-0.540145	0.0777362	0.0347647
T44K	-0.539428	0.0276403	0.0123611
T187N	-0.539319	0.288652	0.129089
S308L	-0.539219	0.0562197	0.0251422
T169Y	-0.536906	0.0104262	0.00466274
V257P	-0.536748	0.171862	0.0768591
S27Q	-0.536095	0.00731516	0.00327144
T110K	-0.535613	0.0539716	0.0241369
T110M	-0.535466	0.031387	0.0140367
S256R	-0.527543	0.0719138	0.0321609
E259R	-0.527455	0.53641	0.23989
N88I	-0.527453	0.00069533	0.000310961
I50L	-0.527398	0.0775725	0.0346915
A45I	-0.526664	0.0424115	0.018967
T169F	-0.523361	0.0655934	0.0293343
T120W	-0.521864	0.121665	0.05441
S294A	-0.52044	0.000667718	0.000298613
S113Q	-0.51752	0.0828552	0.037054
S113K	-0.516922	0.0287046	0.0128371
V33R	-0.516389	0.0213021	0.00952659
D164E	-0.514728	0.0324666	0.0145195
Q128R	-0.514681	0.274306	0.122673
T168Q	-0.514386	0.0229496	0.0102634
N194F	-0.513338	0.00298014	0.00133276
Y268F	-0.511211	0.0102303	0.00457515
T44L	-0.510547	0.0462564	0.0206865
E81M	-0.510516	0.0585779	0.0261968
D133L	-0.510172	0.0184111	0.00823367
T72K	-0.508186	0.159602	0.0713763
T115D	-0.506694	0.0330529	0.0147817
N140L	-0.506257	0.654644	0.292766
E311I	-0.503076	0.0159117	0.00711594
S84E	-0.501196	0.0712963	0.0318847
E263Q	-0.499235	0.0213301	0.00953913
I46L	-0.496604	0.0634	0.0283533
E304L	-0.496266	0.0678081	0.0303247
G28S	-0.495291	0.149455	0.0668383
S149F	-0.495199	0.01394	0.00623417
T124A	-0.494774	6.20634e-17	2.77556e-17
T190N	-0.491933	0.00251481	0.00112466
D51Q	-0.491495	0.193804	0.086672
A153L	-0.490157	0.0481219	0.0215208
T110R	-0.488008	0.0278126	0.0124382
S273K	-0.487476	0.175531	0.0784996
T44Y	-0.487035	0.00579978	0.00259374
D117H	-0.484224	0.0091544	0.00409397
A78E	-0.481642	0.102469	0.0458256
A178W	-0.479885	0.468138	0.209358
T190H	-0.477475	0.00401175	0.00179411
D274Q	-0.475451	0.00129682	0.000579954
A153M	-0.474889	0.0340659	0.0152347
V33K	-0.473802	0.156058	0.0697912
D219M	-0.473775	0.104385	0.0466826
Q228K	-0.47215	0.0478234	0.0213873
T187W	-0.470283	0.000816007	0.00036493
S113R	-0.468549	0.0606944	0.0271434
D274A	-0.466347	0	0
T120E	-0.465895	0.0343562	0.0153645
E14Q	-0.465769	0.0552783	0.0247212
T196K	-0.465759	0.0473426	0.0211723
S149Y	-0.463862	0.0371204	0.0166008
A191Y	-0.463801	0.200337	0.0895934
E304K	-0.463379	0.0478224	0.0213868
S308Q	-0.462682	0.147016	0.0657474
T120V	-0.461616	0.00648598	0.00290062
S12V	-0.461545	0.0455299	0.0203616
S116Q	-0.45915	0.114849	0.051362
D138H	-0.45898	0.0249514	0.0111586
T69K	-0.457136	0.0699333	0.0312751
G28M	-0.454746	0.149578	0.0668933
T120A	-0.454718	0.000154122	6.89256e-05
S308M	-0.454249	0.110541	0.0494356
S116L	-0.452889	0.00716181	0.00320286
D267R	-0.452189	0.0476502	0.0213098
S215W	-0.451414	0.154114	0.0689219
S199P	-0.448223	0.341805	0.15286
V222M	-0.447206	0.141503	0.0632822
S215M	-0.447195	0.0890509	0.0398248
E296V	-0.446904	0.223506	0.0999548
S256W	-0.446486	0.210866	0.0943021
A178C	-0.445301	0.184066	0.0823169
T169V	-0.445191	0.0645526	0.0288688
S27Y	-0.44457	0.136817	0.0611864
I292K	-0.442168	0.195229	0.0873092
S240M	-0.441274	0.00511888	0.00228923
E296H	-0.440535	0.00554809	0.00248118
Q228R	-0.439997	0.0192428	0.00860564
S116M	-0.438815	0.0647023	0.0289358
E304R	-0.437778	0.0805516	0.0360238
S116W	-0.436523	0.00283842	0.00126938
G92M	-0.436133	0.12079	0.0540188
T124W	-0.435905	0.0821796	0.0367518
D133F	-0.435307	0.090726	0.0405739
Y89M	-0.435157	0.130576	0.0583952
E14R	-0.435041	0.0284213	0.0127104
T77Q	-0.434971	0.018269	0.00817013
T169I	-0.43476	0.055849	0.0249764
S305N	-0.433917	0.031109	0.0139123
S218M	-0.43246	0.196843	0.0880307
D267L	-0.432326	0.0531072	0.0237502
W183M	-0.431767	0.0208996	0.00934658
E14Y	-0.431164	0.0237102	0.0106035
S273R	-0.429391	0.0814969	0.0364465
T187I	-0.427342	0.0248802	0.0111268
I46M	-0.4264	0.0248596	0.0111175
T186K	-0.426131	0.0542595	0.0242656
Q128K	-0.425794	0.0614057	0.0274615
E263N	-0.425777	0.0856455	0.0383019
T187F	-0.424553	0.03887	0.0173832
E271G	-0.42372	0.004872	0.00217883
S256Y	-0.423245	0.373279	0.166935
G92K	-0.420936	0.192228	0.085967
T169H	-0.420872	0.0136833	0.00611934
S149L	-0.419577	0.0631678	0.0282495
N194Y	-0.419544	0.00126773	0.000566945
E260R	-0.418512	0.428785	0.191759
D274V	-0.418417	0.00132287	0.000591604
E260M	-0.417291	0.0311726	0.0139408
T110Q	-0.413969	0.0283927	0.0126976
S240H	-0.412942	0.00705813	0.00315649
T110L	-0.412762	0.070298	0.0314382
S131R	-0.412733	0.250385	0.111976
T187A	-0.41269	0.000171347	7.66286e-05
A95K	-0.412537	0.113258	0.0506506
A178R	-0.411322	0.0285535	0.0127695
N241M	-0.40953	0.0909846	0.0406896
A95C	-0.408846	0.0183632	0.00821229
E271Q	-0.408558	0.00693348	0.00310075
T110Y	-0.408557	0.00813892	0.00363984
E148L	-0.404279	0.202096	0.09038
T169G	-0.402882	0.00205405	0.0009186
A254K	-0.399877	0.0878623	0.0392932
E85Q	-0.399603	0.00497931	0.00222682
S149P	-0.397525	0.0708768	0.0316971
W287R	-0.397441	0.320262	0.143226
T196R	-0.396611	0.15141	0.0677127
S256A	-0.39653	0	0
T236L	-0.394216	0.00662613	0.00296329
T169C	-0.393388	0.0351741	0.0157303
D290M	-0.392919	0.033829	0.0151288
S149D	-0.392826	0.00693927	0.00310334
Y171W	-0.392802	0.0186467	0.00833907
Y179F	-0.392567	0.000976419	0.000436668
D213Q	-0.39212	0.0185096	0.00827775
T77K	-0.392023	0.0529968	0.0237009
Q239I	-0.38962	0.0119469	0.0053428
D117N	-0.386995	0.00248244	0.00111018
T169D	-0.385208	0.0495702	0.0221685
S116K	-0.384336	0.0222325	0.00994268
V257M	-0.383726	0.0579142	0.0259
E81F	-0.383599	0.00511679	0.0022883
N241K	-0.381594	0.0324654	0.014519
Y188V	-0.380956	0.00980247	0.0043838
A95L	-0.380784	0.814757	0.36437
V257I	-0.38067	0.014532	0.00649892
N140C	-0.380495	0.0372957	0.0166792
D290Y	-0.380192	0.0529896	0.0236977
Y188H	-0.380131	0.3719	0.166319
S149K	-0.378783	0.037069	0.0165778
D133Y	-0.377025	0.0362184	0.0161974
S127M	-0.376947	0.0793578	0.0354899
E142M	-0.376561	0.0638152	0.028539
E311H	-0.374439	0.0497327	0.0222411
G28L	-0.374194	0.0529171	0.0236653
T36V	-0.373768	0.000692945	0.000309894
T196M	-0.373385	0.0433064	0.0193672
A191E	-0.37208	0.0190857	0.0085354
A78T	-0.370618	0.0079823	0.00356979
V262L	-0.365911	0.385456	0.172381
S283P	-0.364056	0.166149	0.0743042
A45P	-0.362454	0.396392	0.177272
S116R	-0.362184	0.0696493	0.0311481
T69D	-0.361254	0.0263734	0.0117945
T217M	-0.361153	0.0242694	0.0108536
S27K	-0.359972	0.0287849	0.012873
V33H	-0.358868	0.00519358	0.00232264
E20K	-0.358693	0.324454	0.1451
Y303F	-0.357814	0.0024657	0.0011027
E34K	-0.3574	0.0446322	0.0199601
S116A	-0.357396	0.000544051	0.000243307
Y171P	-0.35734	0.144251	0.064511
G264V	-0.357135	0.0742582	0.0332093
S123Y	-0.355648	0.0919511	0.0411218
A279C	-0.355455	0.00102914	0.000460245
S240W	-0.355371	0.0191491	0.00856373
D164C	-0.355117	0.000496176	0.000221897
S240Q	-0.354602	0.0320671	0.0143409
S113L	-0.353406	0.00518525	0.00231891
S131M	-0.353233	0.061104	0.0273265
V232I	-0.353102	0.00617608	0.00276203
T236K	-0.351975	0.018049	0.00807178
S149R	-0.351054	0.0390229	0.0174516
T36H	-0.351042	0.0254563	0.0113844
G28Y	-0.350718	0.0813171	0.0363661
S199R	-0.3495	0.0666547	0.0298089
W183E	-0.347102	0.00986079	0.00440988
D200N	-0.345385	0.00349307	0.00156215
Q208I	-0.345347	0.0534035	0.0238828
E260L	-0.343622	0.028252	0.0126347
Y188R	-0.341554	0.423384	0.189343
V262I	-0.341472	0.0111958	0.00500692
T187Y	-0.341128	0.0782044	0.0349741
T236R	-0.340286	0.0589247	0.0263519
T312R	-0.340005	0.39007	0.174445
V232S	-0.339491	0.000911159	0.000407483
T44R	-0.33632	0.0107964	0.00482831
A78S	-0.33474	0.00139213	0.000622578
V232E	-0.334452	0.0330275	0.0147703
I67L	-0.33254	0.0864743	0.0386725
E271C	-0.332379	0.00551012	0.0024642
D274C	-0.329845	2.48656e-05	1.11203e-05
S11A	-0.329446	0	0
E259A	-0.327833	0.076389	0.0341622
G28N	-0.32723	0.0400554	0.0179133
S84W	-0.327132	0.489171	0.218764
S149A	-0.324851	4.47214e-07	2e-07
T186R	-0.323877	0.143888	0.0643488
M192L	-0.322997	0.0295277	0.0132052
E70I	-0.322118	0.0230876	0.0103251
S212V	-0.321761	0.00594163	0.00265718
V150I	-0.321758	0.00398843	0.00178368
T43R	-0.321052	0.098406	0.0440085
E85L	-0.320316	0.0469562	0.0209995
V232L	-0.319634	0.0612507	0.0273922
M295L	-0.319279	0.096923	0.0433453
I30M	-0.318925	0.0942539	0.0421516
D133M	-0.318358	0.0611968	0.027368
D267Q	-0.318154	0.0274375	0.0122704
E85R	-0.317254	0.141047	0.0630782
T115F	-0.316446	0.150108	0.0671301
S308W	-0.315635	0.00209618	0.000937438
E81Y	-0.315594	0.0160157	0.00716243
A52L	-0.314146	0.368451	0.164776
D160R	-0.313455	0.051327	0.0229541
Y89F	-0.313411	0.235608	0.105367
T36L	-0.313329	0.0116697	0.00521887
D211P	-0.312606	0.0510747	0.0228413
N241L	-0.311698	0.249588	0.111619
D219Q	-0.310306	0.0691802	0.0309383
G28E	-0.30836	0.0547061	0.0244653
S123A	-0.307515	0.0304127	0.013601
G242K	-0.306395	0.0405479	0.0181336
T217C	-0.306341	0.0275984	0.0123424
S308F	-0.306215	0.0161038	0.00720186
S114N	-0.301609	0.0804251	0.0359672
E311C	-0.301003	0.09091	0.0406562
S224I	-0.300735	0.0766109	0.0342614
G92S	-0.300191	0.0202445	0.00905361
S212A	-0.299791	0	0
S113H	-0.299575	0.0339599	0.0151873
V222L	-0.297844	0.0692741	0.0309803
S127L	-0.297817	0.0357294	0.0159787
S308V	-0.295829	0.00223274	0.000998512
Q228P	-0.294657	0.00629752	0.00281634
Q220R	-0.292382	0.0317854	0.0142149
S240L	-0.292086	0.00229753	0.00102749
I292M	-0.291437	0.0343342	0.0153547
V232K	-0.288984	0.0216931	0.00970147
G28A	-0.287969	0	0
S149I	-0.28758	0.00481503	0.00215335
E263V	-0.285399	0.0187759	0.00839683
K130R	-0.282239	0.141859	0.0634411
S218L	-0.281164	0.015126	0.00676457
S215K	-0.280625	0.102074	0.0456487
S215L	-0.279836	0.103343	0.0462165
E229M	-0.277988	0.039111	0.017491
D219E	-0.276364	0.102541	0.0458575
S224A	-0.275596	0.00150814	0.000674461
S224V	-0.275375	0.0918011	0.0410547
T190A	-0.275362	0.00349172	0.00156154
T72N	-0.274565	0.249064	0.111385
D51S	-0.274207	0.129414	0.0578758
D200R	-0.272673	0.106195	0.047492
E271S	-0.272585	0.00581882	0.00260226
N194Q	-0.272318	0.0190401	0.00851498
E311A	-0.272277	0.0158892	0.00710587
S116F	-0.272143	0.0110678	0.00494967
S12E	-0.270642	0.010626	0.00475211
D274F	-0.270058	0.01943	0.00868935
D274T	-0.269182	0.000235189	0.00010518
T69L	-0.26855	0.0444732	0.019889
E304Q	-0.267129	0.0198609	0.00888205
Y188I	-0.265557	0.0409124	0.0182966
S273H	-0.265177	0.0115169	0.0051505
S116P	-0.265144	0.110796	0.0495496
S240F	-0.264383	0.000345217	0.000154386
S74D	-0.264377	0.00164888	0.000737402
D213P	-0.263591	0.129353	0.0578486
Q220W	-0.262025	0.0183259	0.00819558
A52W	-0.260927	0.07509	0.0335813
L75M	-0.259588	0.153207	0.0685163
S224C	-0.259256	0.0245456	0.0109771
T110C	-0.259131	0.0523063	0.0233921
Y171F	-0.258141	0.0105966	0.00473896
D290R	-0.257136	0.109545	0.0489899
T236I	-0.256328	0.000719514	0.000321777
E34L	-0.256128	0.00308097	0.00137785
T43W	-0.255923	0.0285742	0.0127788
Y188K	-0.255698	0.0190749	0.00853057
S215R	-0.254706	0.124882	0.0558491
E304I	-0.252067	0.000394346	0.000176357
D51A	-0.251999	0.134055	0.0599514
S283A	-0.249945	0.00116278	0.000520012
N194L	-0.249844	0.00089242	0.000399103
G92C	-0.249573	0.00907387	0.00405796
E34F	-0.249435	0.00628043	0.00280869
T217G	-0.247464	0.0244448	0.0109321
N299K	-0.24729	0.0271755	0.0121533
T217V	-0.246388	0.021195	0.00947869
S12H	-0.246026	0.00354477	0.00158527
N88C	-0.241706	0.0030744	0.00137492
E304T	-0.241007	0.00334179	0.00149449
T77R	-0.240831	0.0532653	0.023821
E85K	-0.238999	0.0357124	0.0159711
N255E	-0.238811	0.613654	0.274435
N299S	-0.238023	0.0382132	0.0170895
T110W	-0.237043	0.0109431	0.00489389
E85S	-0.236327	0.00232072	0.00103786
D133R	-0.235468	0.0467235	0.0208954
E311F	-0.235097	0.011981	0.00535807
T196L	-0.234907	0.00664457	0.00297154
T168I	-0.234157	0.00910739	0.00407295
E34H	-0.232292	0.00187006	0.000836315
A178G	-0.231726	3.10317e-17	1.38778e-17
Q289R	-0.23111	0.0667474	0.0298503
S127N	-0.231081	0.0970816	0.0434162
E81K	-0.230959	0.0340905	0.0152457
T39L	-0.229392	0.0725723	0.0324553
D274Y	-0.228862	0.0118341	0.00529239
S240Y	-0.225872	0.00448878	0.00200744
T124N	-0.225447	0.00543548	0.00243082
S12N	-0.224093	0.0327395	0.0146416
E263A	-0.223749	0.0189797	0.00848796
S256V	-0.223705	0.000128305	5.738e-05
D213M	-0.22321	0.0788941	0.0352825
S116Y	-0.222557	0.000694816	0.000310731
T44A	-0.219908	0.00840204	0.00375751
S215F	-0.219069	0.113708	0.0508516
T72I	-0.217384	0.211411	0.0945461
E70Q	-0.214026	0.0429208	0.0191948
A52Q	-0.212269	0.0412184	0.0184334
T236F	-0.208776	0.00874131	0.00390923
S123F	-0.208631	0.0702733	0.0314272
E205D	-0.208363	0.00962834	0.00430592
E229Q	-0.205564	0.00241538	0.00108019
V193M	-0.204603	0.00906714	0.00405495
D133N	-0.204415	0.0190705	0.0085286
V231L	-0.203422	0.34075	0.152388
S240N	-0.203129	0.000121882	5.45074e-05
S74P	-0.20269	0.00665054	0.00297421
D219W	-0.20129	0.0909861	0.0406902
Q47Y	-0.201225	0.403395	0.180404
V257A	-0.201179	0.000656957	0.0002938
T36N	-0.19817	0.186404	0.0833622
T187D	-0.197961	0.0178637	0.0079889
D213L	-0.19727	0.158975	0.0710958
T69I	-0.196954	0.0122871	0.00549495
G264E	-0.196817	0.0237155	0.0106059
I90M	-0.196498	0.102738	0.0459458
D133Q	-0.195724	0.0185171	0.0082811
T115V	-0.195651	0.0070765	0.00316471
D200Q	-0.194439	0.0353363	0.0158029
E148P	-0.193624	0.0578169	0.0258565
I301Q	-0.192332	0.0122388	0.00547335
A191V	-0.192289	0.00121983	0.000545523
S74G	-0.19161	0	0
E81R	-0.191108	0.247418	0.110648
V193L	-0.190048	0.0836585	0.0374132
A153R	-0.189972	0.199153	0.0890639
V150K	-0.189421	0.0569413	0.0254649
V257R	-0.18932	0.0564419	0.0252416
S308Y	-0.188152	0.00393276	0.00175878
E304W	-0.187901	0.0594004	0.0265647
D267W	-0.187737	0.182801	0.0817513
E175K	-0.187413	0.876218	0.391857
G264C	-0.185882	0.00024941	0.000111539
Y188L	-0.185461	0.0145086	0.00648845
T169R	-0.184353	0.114315	0.051123
S199A	-0.183156	0.0013438	0.000600964
S224N	-0.182705	0.0192827	0.00862349
S218I	-0.182046	0.229837	0.102786
S149H	-0.180462	0.0684154	0.0305963
V257Q	-0.178949	0.103263	0.0461807
S224Y	-0.177039	0.191496	0.0856398
V257K	-0.176944	0.138615	0.0619904
T36I	-0.175436	0.00148155	0.000662569
N272R	-0.174628	0.280232	0.125323
L277M	-0.174427	0.0182084	0.00814305
A45T	-0.174152	0.0111641	0.00499274
E260I	-0.17309	0.0272875	0.0122033
T115A	-0.171878	0.000390755	0.000174751
S127R	-0.171437	0.225049	0.100645
L201M	-0.170952	0.0226791	0.0101424
L310M	-0.170831	0.130888	0.058535
A95R	-0.170379	0.206761	0.0924664
S212D	-0.170325	0.00681124	0.00304608
V151I	-0.169453	0.00286105	0.0012795
T72V	-0.168217	0.0815437	0.0364674
T217W	-0.167263	0.0467398	0.0209027
S74F	-0.166313	0.124235	0.0555594
T69H	-0.166004	0.034151	0.0152728
D274N	-0.165535	0.00290286	0.0012982
T44I	-0.165216	0.00819465	0.00366476
T225S	-0.16417	0.00173569	0.000776222
N88V	-0.163454	0.00225153	0.00100692
T39I	-0.161908	0.0442334	0.0197818
D133W	-0.161896	0.0321676	0.0143858
S256N	-0.160238	0.191947	0.0858412
S212T	-0.159423	0.0517041	0.0231228
D160E	-0.159357	0.0480088	0.0214702
I301M	-0.15884	0.0144081	0.0064435
T217S	-0.156753	0.000939871	0.000420323
L269M	-0.155979	0.0221463	0.00990415
G28W	-0.155442	0.0180681	0.0080803
G181C	-0.155398	0.0182018	0.0081401
V33F	-0.154581	0.0179487	0.00802689
D133E	-0.154553	0.0226515	0.01013
V226I	-0.154241	0.000968145	0.000432967
D233M	-0.153378	0.0191126	0.00854741
D160Q	-0.152299	0.251198	0.112339
E311Y	-0.151918	0.0127802	0.00571546
E260A	-0.151436	0.0188426	0.00842669
A191R	-0.151405	0.0268944	0.0120276
S240T	-0.15095	0.00190948	0.000853943
T196I	-0.150893	0.0191714	0.00857369
G28D	-0.150625	0.000220515	9.86172e-05
V232R	-0.150601	0.0422664	0.0189021
V232W	-0.150455	0.0800541	0.0358013
D164G	-0.150164	0	0
T236Y	-0.149746	0.00512194	0.0022906
T69N	-0.149286	0.0300671	0.0134464
T187V	-0.149106	0.0152929	0.0068392
E263S	-0.148267	0.0194431	0.00869524
G28C	-0.147031	1.30384e-06	5.83095e-07
S74E	-0.147023	0.0466148	0.0208468
D267H	-0.146132	0.02789	0.0124728
T168N	-0.145958	0.0909723	0.0406841
Q220T	-0.14568	0.013476	0.00602665
T39R	-0.143325	0.054158	0.0242202
D274S	-0.143176	0.00024271	0.000108543
Y303W	-0.141009	0.500777	0.223954
E249M	-0.140651	0.34794	0.155604
G242R	-0.140305	0.221159	0.0989052
A191Q	-0.139944	0.0260149	0.0116342
S280Q	-0.139475	0.013712	0.00613217
S215Y	-0.1394	0.0927217	0.0414664
S305I	-0.139137	0.321986	0.143996
A270K	-0.138369	0.0642551	0.0287357
I202L	-0.138179	0.0427942	0.0191382
S116I	-0.136506	0.0670146	0.0299698
S12G	-0.136014	0.000812752	0.000363474
V33T	-0.13256	0.0738864	0.033043
S84F	-0.132474	0.264581	0.118324
V59M	-0.132078	0.481209	0.215203
T72P	-0.131964	0.0255869	0.0114428
D274E	-0.131613	0.00435879	0.00194931
S240A	-0.129861	0	0
S116N	-0.128797	0.0563904	0.0252185
S74H	-0.128631	0.0096754	0.00432697
K93R	-0.127774	0.167127	0.0747417
I301L	-0.127416	0.00562074	0.00251367
T77A	-0.12562	6.33814e-05	2.8345e-05
E70Y	-0.124669	0.235203	0.105186
G28I	-0.123196	0.0110918	0.00496042
E260N	-0.122448	0.0186152	0.00832496
S212H	-0.120844	0.018612	0.00832356
I30L	-0.120487	0.0565353	0.0252833
T69E	-0.11899	0.0529729	0.0236902
V257D	-0.118512	0.0169119	0.00756322
Q47L	-0.117117	0.211316	0.0945035
E260K	-0.116931	0.0700066	0.0313079
E70M	-0.116706	0.0250808	0.0112165
T115W	-0.116559	0.0421616	0.0188552
S27C	-0.116551	0.000306392	0.000137022
E260W	-0.11584	0.0449161	0.0200871
T169K	-0.115026	0.0258215	0.0115477
G92A	-0.113709	0.0261021	0.0116732
W183D	-0.113112	0.196797	0.0880102
E34Y	-0.111519	0.00339312	0.00151745
S280N	-0.110755	0.279727	0.125098
T77F	-0.110328	0.0010111	0.000452176
D51H	-0.10724	0.142784	0.063855
S131F	-0.107193	0.0663892	0.0296901
S116H	-0.10692	0.0251995	0.0112696
T190V	-0.10655	0.00332474	0.00148687
S131K	-0.105471	0.0752165	0.0336379
Q47W	-0.103233	0.29535	0.132084
V232Q	-0.103213	0.034428	0.0153967
N241R	-0.10182	0.0321443	0.0143754
E260F	-0.100075	0.0521411	0.0233182
T110I	-0.0979273	0.0849674	0.0379986
T312S	-0.0951267	0.0108644	0.0048587
E20T	-0.09464	0.634899	0.283935
D290L	-0.089614	0.0139008	0.00621664
K93M	-0.0895476	0.16769	0.0749931
N88S	-0.0871757	0.000680779	0.000304454
N194I	-0.08681	0.00699256	0.00312717
D200H	-0.0854442	0.0835786	0.0373775
S224F	-0.0853893	0.0283949	0.0126986
V33Y	-0.0851324	0.00715358	0.00319918
T43A	-0.0842845	0.00298656	0.00133563
T36M	-0.0839558	0.0504868	0.0225784
L125M	-0.0831536	0.0413017	0.0184707
D160A	-0.0831219	0.0414315	0.0185287
E260Q	-0.0822054	0.0221519	0.00990661
D274G	-0.0820104	0	0
T43C	-0.0808962	0.00700736	0.00313379
S218N	-0.0808334	0.0506585	0.0226552
A52V	-0.08046	0.0299114	0.0133768
E34R	-0.080434	0.0312384	0.0139702
A153K	-0.0795531	0.0523277	0.0234017
D133A	-0.079042	0.0184946	0.00827106
D233L	-0.0788542	0.0428946	0.0191831
D51E	-0.0776764	0.128109	0.0572921
D133K	-0.0776206	0.0615718	0.0275357
E142C	-0.0773329	0.0502646	0.022479
S131L	-0.0758405	0.0629327	0.0281444
T69A	-0.0750263	0.00418677	0.00187238
V152L	-0.074412	0.000919128	0.000411046
T72A	-0.0738522	0.00426355	0.00190672
T169L	-0.0737379	0.0520009	0.0232555
T110E	-0.0734916	0.0194538	0.00869998
G181V	-0.0718065	0.020302	0.00907931
I309R	-0.0715104	0.400626	0.179165
S74R	-0.069395	0.362221	0.16199
A153N	-0.0686933	0.00905195	0.00404815
E81N	-0.0675583	0.00512006	0.00228976
S123Q	-0.0674829	0.0130509	0.00583654
S127A	-0.0674002	0.0120928	0.00540808
S223M	-0.066853	0.0399786	0.017879
D267A	-0.0666912	0.0576504	0.025782
T169N	-0.0666499	0.049906	0.0223186
S305A	-0.0664689	0.0134	0.00599267
E70T	-0.0658931	0.0211107	0.00944097
E259T	-0.0656107	0.198175	0.0886267
S212N	-0.0632484	0.00630002	0.00281746
T312K	-0.0627731	0.0164948	0.00737671
E263H	-0.0625544	0.0377056	0.0168624
N241H	-0.0624121	0.000962752	0.000430556
W288F	-0.0620165	0.101754	0.0455057
T77Y	-0.0614544	0.00825577	0.00369209
T69C	-0.0609437	0.033372	0.0149244
Y188Q	-0.0600426	0.265092	0.118553
A45R	-0.05953	0.490287	0.219263
F80M	-0.0584692	0.151522	0.0677627
S308T	-0.0577767	0.00817816	0.00365738
E81I	-0.0575926	0.00686362	0.0030695
A78Q	-0.057409	0.00599284	0.00268008
T124C	-0.0559775	0.00088619	0.000396316
T186F	-0.0558404	0.0158066	0.00706891
N299G	-0.0547478	0.039305	0.0175777
A270M	-0.0536871	0.10914	0.048809
D133G	-0.053249	0.00614413	0.00274774
Q119R	-0.0529807	0.0421041	0.0188295
G28T	-0.0529618	0.265831	0.118883
T110S	-0.0514856	6.10257e-05	2.72915e-05
S273N	-0.0512144	0.00129801	0.000580487
S131Y	-0.0511478	0.0624741	0.0279393
Y303M	-0.0497953	0.0378404	0.0169227
D164I	-0.0472902	0.0369499	0.0165245
E259Q	-0.0448113	0.0756017	0.0338101
T168V	-0.0440004	0.0180065	0.00805275
E311T	-0.0431797	0.0218478	0.00977065
D200C	-0.0429121	0.0999691	0.0447076
A254R	-0.0425226	0.104538	0.0467507
N194W	-0.0418757	0.000837379	0.000374487
D233K	-0.0414553	0.0319738	0.0142991
E304A	-0.0412713	0.014346	0.00641574
S224W	-0.0387973	0.0627704	0.0280718
D200S	-0.0387709	0.0121163	0.00541856
D290W	-0.0385592	0.033365	0.0149213
E296D	-0.0383333	0.279432	0.124966
N241W	-0.0372432	0.000855899	0.00038277
V33L	-0.0365781	0.00024235	0.000108382
T77V	-0.0360077	8.71717e-05	3.89844e-05
V33I	-0.0357445	0.00208916	0.000934303
T43F	-0.0346381	0.0133971	0.00599139
S113E	-0.0341522	0.0175379	0.00784318
S215V	-0.0333843	0.0739326	0.0330637
T36E	-0.0322949	0.00527115	0.00235733
D100N	-0.0322013	0.0585971	0.0262054
N88H	-0.0321302	0.0035171	0.0015729
G28H	-0.0313823	0.015374	0.00687548
S74Q	-0.0311947	0.0272662	0.0121938
E81S	-0.0306793	0.00515565	0.00230568
S74N	-0.0305216	0.0294347	0.0131636
T44S	-0.0295588	0.0190898	0.00853723
E260Y	-0.0288424	0.0274427	0.0122727
G73M	-0.0264776	0.364937	0.163205
N194R	-0.0260377	0.0722033	0.0322903
S11C	-0.0256863	0.00116874	0.000522677
V33Q	-0.0253752	0.00930005	0.00415911
S149G	-0.0249344	0.00321529	0.00143792
E304S	-0.0243345	0.0129341	0.0057843
T124E	-0.0221058	0.0148585	0.0066449
Q128L	-0.0218859	0.0397987	0.0177985
A178S	-0.0218081	0.0124778	0.00558025
E229W	-0.0211079	0.015189	0.00679275
S11R	-0.0200878	0.00217451	0.000972471
S218E	-0.0200461	0.0132634	0.00593157
A178E	-0.0188118	0.0227767	0.0101861
S218W	-0.0176394	0.0118992	0.00532148
T236W	-0.0167751	0.0265982	0.0118951
S308E	-0.0158796	0.0265776	0.0118859
T77N	-0.0153587	0.0312484	0.0139747
V86L	-0.0152053	0.287862	0.128736
S256T	-0.0148674	0.033016	0.0147652
G28P	-0.0142463	0.00859974	0.00384592
E81W	-0.0138022	0.00921275	0.00412007
S215Q	-0.0135592	0.198839	0.0889237
S74K	-0.0134263	0.0376447	0.0168352
E259S	-0.0130973	0.0328525	0.0146921
S113C	-0.0122165	0.00298969	0.00133703
Y188F	-0.0105959	0.00414609	0.00185419
G92R	-0.0102295	0.161436	0.0721963
T190C	-0.0095197	0.111129	0.0496986
S149N	-0.00939377	6.52129e-05	2.91641e-05
D213N	-0.0089012	0.00503608	0.0022522
S256H	-0.0063836	0.0359636	0.0160834
E259C	-0.00637788	0.0685556	0.030659
D219A	-0.00594599	0.0318637	0.0142499
T115Y	-0.00587222	0.041541	0.0185777
A153W	-0.0044907	0.0394605	0.0176473
Q289F	-0.00400438	0.0708386	0.03168
V151M	9.412e-05	0.115226	0.0515307
S113D	0.00036034	0.055191	0.0246822
Y268M	0.00133016	0.226396	0.101247
E85A	0.00187414	0.00128244	0.000573523
T186Y	0.00191336	0.0146165	0.00653669
D160V	0.00327612	0.0455327	0.0203628
T225N	0.00670798	0.128705	0.0575586
D117S	0.00699028	0.00986377	0.00441121
T36F	0.00784848	0.000972378	0.000434861
L247M	0.00785368	0.079772	0.0356751
Q289W	0.00821654	0.0692976	0.0309908
T72S	0.0102322	0.0154566	0.0069124
S123W	0.010852	0.113564	0.0507872
S149T	0.011006	0.00209725	0.000937919
S305Q	0.0111591	0.0366981	0.0164119
Y38F	0.0132537	0.0680821	0.0304472
T120C	0.0138672	0.0782301	0.0349856
S74Y	0.0148007	0.029222	0.0130685
H144Y	0.0151248	0.515881	0.230709
V222I	0.0155598	0.0958691	0.042874
S27E	0.0195923	0.0600721	0.026865
S256C	0.0196638	0.00117411	0.000525079
A165S	0.0197663	0.00314161	0.00140497
V150A	0.0200264	0.00207503	0.000927983
A270R	0.020267	0.0487293	0.0217924
S215G	0.0206516	0.0911177	0.0407491
T312Q	0.0208699	0.0378857	0.016943
S240I	0.0212454	0.000786124	0.000351565
A52N	0.0218071	0.0404451	0.0180876
S21A	0.0219412	0.0582994	0.0260723
A153E	0.0220469	0.0193098	0.00863563
V222E	0.0220594	0.0144404	0.00645796
K93L	0.0225033	0.133959	0.0599082
T69S	0.023397	0.0355596	0.0159027
E70F	0.0238217	0.0232004	0.0103755
E14A	0.0248582	0.0238541	0.0106679
T190G	0.025064	0.00349744	0.0015641
E148I	0.0251889	0.0514935	0.0230286
I301K	0.0260822	0.0405457	0.0181326
T236H	0.026163	0.00305293	0.00136531
Y143F	0.0266846	0.0241425	0.0107968
N42P	0.0271899	0.0303315	0.0135647
T36W	0.0275305	0.00381606	0.00170659
P111M	0.02886	0.290829	0.130063
E263C	0.030461	0.0204908	0.00916378
Q220M	0.0306011	0.0595688	0.02664
H102F	0.0311686	0.0206522	0.00923593
I112M	0.0312368	0.0150019	0.00670907
E14V	0.0313242	0.0242703	0.010854
D164V	0.0313722	0.255965	0.114471
S27I	0.0320148	0.129107	0.0577383
S11K	0.0327084	0.00495384	0.00221542
T43Y	0.0328324	0.011355	0.00507813
V203I	0.0333435	0.0718287	0.0321228
E70S	0.0339328	0.0257548	0.0115179
S149V	0.0342055	0.00260992	0.00116719
T186I	0.0353918	0.0220502	0.00986115
S218C	0.0374329	4.60445e-05	2.05917e-05
A254L	0.0377453	0.30067	0.134464
H144M	0.0390701	0.123093	0.0550487
A270L	0.0395915	0.282088	0.126154
A78R	0.0409353	0.015313	0.00684819
D290N	0.041113	0.0115735	0.00517582
T110H	0.0429829	0.0017737	0.000793221
D200E	0.0442297	0.00360172	0.00161074
T217A	0.0443186	0.0275675	0.0123286
Q289C	0.0448618	0.059537	0.0266258
Q289M	0.0459614	0.0712314	0.0318557
S116G	0.0463341	0.00151758	0.000678685
D213C	0.0468179	0.0113727	0.00508604
S224D	0.0480845	0.0750733	0.0335738
V222Q	0.0491836	0.0450373	0.0201413
D213I	0.0503647	0.022986	0.0102797
D200A	0.0524355	0.000271861	0.00012158
T69V	0.0532624	0.00104611	0.000467835
Q289Y	0.0537218	0.0698004	0.0312157
D213E	0.0553362	0.0160128	0.00716114
S12T	0.0553424	0.159077	0.0711413
E229L	0.0560655	0.00486754	0.00217683
Y291F	0.0584229	0.0091807	0.00410573
T190S	0.0592623	0.00345663	0.00154585
Q220I	0.0598879	0.0143041	0.00639699
N299Q	0.0606011	0.0165947	0.00742137
I301A	0.0611875	0.00681525	0.00304787
S215A	0.061388	0.27231	0.121781
T36Y	0.0623513	0.00545169	0.00243807
E81T	0.0624865	0.00456936	0.00204348
E271I	0.0639813	0.00393728	0.00176081
V152M	0.065981	0.112661	0.0503835
N88G	0.066835	0	0
A153F	0.0687941	0.0243856	0.0109056
D267E	0.0691826	0.269416	0.120486
I48M	0.0694089	0.0291991	0.0130582
D233E	0.0706884	0.0362894	0.0162291
S131N	0.071533	0.0382265	0.0170954
E81A	0.072015	0.00546288	0.00244307
A191W	0.0726051	0.0245119	0.010962
D219N	0.072723	0.0155636	0.00696025
D290K	0.0740737	0.0238705	0.0106752
I301E	0.075057	0.00833399	0.00372707
S131Q	0.0757486	0.0407467	0.0182225
G245A	0.0762169	0.0589402	0.0263589
S74A	0.0765609	0	0
I56L	0.0766331	0.0186302	0.00833166
T196Q	0.0772236	0.082886	0.0370678
S224T	0.0777884	0.0141279	0.00631821
E260S	0.0778724	0.0185245	0.00828441
Q119A	0.0785978	0.0120135	0.00537262
E24M	0.079534	0.20953	0.0937047
D213G	0.0795837	0.00648363	0.00289957
Q220K	0.0799524	0.0725377	0.0324399
D133C	0.0808519	0.018509	0.0082775
D51V	0.0832296	0.130441	0.0583348
T168E	0.0834041	0.0620517	0.0277504
V222K	0.0838762	0.0475761	0.0212767
S131D	0.0840644	0.011846	0.00529767
S223C	0.0840699	0.00400572	0.00179141
N299L	0.0842331	0.00283785	0.00126913
S27A	0.0843626	0	0
D213A	0.0846634	0.00285686	0.00127763
D117P	0.0860239	0.0055563	0.00248485
S116T	0.0872172	2.80883e-05	1.25614e-05
D274H	0.0877798	0.0216461	0.00968042
A153Y	0.0884247	0.00718193	0.00321186
N299A	0.0902111	0.0395709	0.0176967
T110D	0.0908395	0.00615939	0.00275456
S218V	0.0908885	0.0606629	0.0271293
I67M	0.0915083	0.537017	0.240161
G92E	0.0945536	0.00869929	0.00389044
D117T	0.0959597	0.111534	0.0498796
E296G	0.0960156	0.000167801	7.50428e-05
T36S	0.0981322	0.000419737	0.000187712
W287L	0.0991036	0.0031826	0.0014233
S215T	0.0992645	0.106756	0.0477425
E260H	0.100064	0.0406819	0.0181935
S74C	0.100654	5.47723e-07	2.44949e-07
T120S	0.101286	0.00184699	0.000826001
D290Q	0.101377	0.00432499	0.00193419
G28V	0.101713	5.67847e-05	2.53949e-05
A78L	0.102124	0.0458916	0.0205234
T196S	0.10339	0.00160821	0.000719211
D213F	0.103738	0.020162	0.00901672
Q47F	0.104328	0.442824	0.198037
S11N	0.105034	0.000276473	0.000123642
V257W	0.105182	0.0429713	0.0192174
S11W	0.105484	0.00774068	0.00346174
I56M	0.106261	0.0580271	0.0259505
S215C	0.106398	0.415581	0.185854
V232M	0.107162	0.0315402	0.0141052
Y179M	0.107369	0.0103407	0.0046245
I292C	0.107512	0.0258889	0.0115779
T44N	0.107888	0.00483697	0.00216316
T169S	0.108444	0.0367049	0.0164149
D213S	0.108889	0.0101445	0.00453675
D267I	0.108912	0.0570003	0.0254913
Y179K	0.108996	0.044793	0.020032
V257N	0.109826	0.00268731	0.0012018
L62M	0.111645	0.103852	0.0464442
T184G	0.113043	0.0235067	0.0105125
N299E	0.114148	0.00322631	0.00144285
D213Y	0.114937	0.00773175	0.00345774
D233Q	0.116469	0.0323413	0.0144635
H96K	0.116798	0.0363775	0.0162685
S74L	0.11751	0.00849301	0.00379819
T43D	0.117585	0.00359405	0.00160731
D213V	0.117734	0.00292079	0.00130622
N132L	0.118147	0.0544871	0.0243674
G92L	0.118508	0.0350124	0.015658
I301Y	0.11895	0.159152	0.0711748
S11Y	0.121874	0.00754103	0.00337245
T196C	0.122039	0.00469863	0.00210129
L49M	0.123054	0.0813653	0.0363877
D290G	0.123273	0.0155797	0.00696745
T312M	0.123551	0.02961	0.013242
E70V	0.123761	0.0243294	0.0108804
T184D	0.12489	0.232782	0.104103
S11M	0.12549	0.013296	0.00594616
S11Q	0.126401	0.00544467	0.00243493
E81Q	0.126416	0.0258237	0.0115487
L244M	0.127731	0.0251293	0.0112382
T77G	0.127976	0.00786114	0.00351561
T187G	0.129467	0.00586693	0.00262377
T168C	0.130433	0.0244191	0.0109206
D290P	0.130794	0.0186754	0.0083519
T225G	0.131137	0.0212112	0.00948596
T110N	0.131658	0.00640191	0.00286302
L244R	0.132398	0.254759	0.113932
E229K	0.132491	0.0230457	0.0103063
N132M	0.132915	0.0365013	0.0163239
Q289N	0.133744	0.0593967	0.026563
T44H	0.134013	0.00120177	0.000537447
S294N	0.135363	0.173335	0.0775176
S11F	0.135375	0.00131503	0.000588099
Y188C	0.135626	0.00680693	0.00304415
E70W	0.136444	0.0286466	0.0128111
A78M	0.137241	0.0145328	0.00649925
V99L	0.1373	0.0495027	0.0221383
A254Q	0.138034	0.152404	0.0681573
T91V	0.138175	0.0363968	0.0162771
S215N	0.140111	0.0861937	0.038547
A78K	0.140673	0.048141	0.0215293
A254C	0.141572	0.00106276	0.000475279
T120D	0.142114	0.0237595	0.0106256
T186E	0.143415	0.0266329	0.0119106
S224H	0.144539	0.0258544	0.0115624
V257T	0.144718	0.000532045	0.000237938
H144C	0.145467	0.0427723	0.0191284
V226M	0.145468	0.0342362	0.0153109
T43N	0.145619	0.328684	0.146992
S256G	0.145931	5.27712e-05	2.36e-05
I48K	0.147815	0.174947	0.0782389
A254N	0.148911	0.00354118	0.00158366
Y188M	0.149467	0.0852913	0.0381434
Q128T	0.15009	0.0478442	0.0213966
S305V	0.150241	0.14849	0.0664067
T44V	0.151886	0.00662376	0.00296224
T110A	0.152952	0.000956492	0.000427756
T236Q	0.153082	0.0158095	0.00707022
E260T	0.153246	0.024327	0.0108794
N29I	0.153786	0.0364178	0.0162865
A153Q	0.15462	0.107818	0.0482177
T196V	0.155148	0.00133044	0.00059499
E229I	0.155319	0.00370411	0.00165653
D145R	0.155798	0.0160857	0.00719375
N299Y	0.155966	0.0136946	0.0061244
S212C	0.156615	0.000431834	0.000193122
N272K	0.156647	0.115913	0.0518378
I159L	0.156905	0.0432101	0.0193242
D117I	0.158535	0.520931	0.232968
N299W	0.1611	0.121152	0.054181
V232N	0.162898	0.00480186	0.00214746
N194K	0.163323	0.0691409	0.0309208
S18C	0.164121	0.0808282	0.0361475
A284G	0.164956	0.0601077	0.026881
D290H	0.165934	0.0151851	0.00679098
V193Q	0.16607	0.00832343	0.00372235
V150W	0.168182	0.0294171	0.0131557
V232C	0.170373	0.00113074	0.000505684
G92Q	0.170865	0.0301693	0.0134921
D51N	0.171097	0.0182268	0.00815127
S131I	0.171376	0.0556346	0.0248806
T110V	0.172412	1.13137e-05	5.05964e-06
A191C	0.172451	0.00121164	0.000541863
Q220L	0.17338	0.0428982	0.0191846
T115C	0.174386	0.00063824	0.000285429
T72G	0.174782	0.00431083	0.00192786
Y306F	0.174955	0.0740884	0.0331334
I301R	0.176203	0.0115512	0.00516584
Y303L	0.176206	0.0385989	0.0172619
T77S	0.176332	0.000277848	0.000124258
D233W	0.178381	0.0332223	0.0148575
S308N	0.180509	0.000211703	9.46766e-05
D133H	0.181024	0.0343171	0.0153471
N299F	0.182578	0.0393193	0.0175841
S11H	0.182917	0.00311221	0.00139182
D117V	0.183043	0.0647727	0.0289672
N55K	0.183842	0.1085	0.0485225
G181E	0.184876	0.274073	0.122569
E259N	0.185403	0.00118991	0.000532145
A270F	0.187741	0.444666	0.198861
D117C	0.188499	0.00122796	0.000549162
T225I	0.189528	0.0500728	0.0223932
N299H	0.189607	0.0303204	0.0135597
V33N	0.190105	0.000945889	0.000423014
T186A	0.190329	0.00913346	0.00408461
I48R	0.191171	0.096033	0.0429472
N140A	0.191671	0.0266703	0.0119273
D267T	0.192035	0.0647442	0.0289545
D200F	0.193023	0.00652972	0.00292018
Q228H	0.194506	0.0266817	0.0119324
E85I	0.196024	0.0119412	0.00534025
A284C	0.198003	0.0299608	0.0133989
L201K	0.19898	0.0241238	0.0107885
D133I	0.199847	0.0233251	0.0104313
T236S	0.201438	0.000538562	0.000240852
S74M	0.201813	0.0298595	0.0133536
E311S	0.202652	0.0158396	0.00708368
T168A	0.202681	0.0075378	0.00337101
S131W	0.20281	0.067136	0.0300242
T184S	0.204193	0.063559	0.0284244
Q289H	0.20463	0.0677493	0.0302984
V99M	0.205783	0.249131	0.111415
E311V	0.208101	0.018004	0.00805162
D145K	0.208121	0.0371495	0.0166138
V193A	0.209113	0.00780075	0.0034886
E296P	0.211432	0.113391	0.0507101
E34Q	0.212402	0.0154307	0.0069008
D267N	0.212568	0.191685	0.0857241
S273C	0.21261	0.0173851	0.00777487
T36G	0.212899	0.000470831	0.000210562
T196E	0.213016	0.00374917	0.00167668
T225D	0.213386	0.19854	0.0887897
S215I	0.213391	0.0754735	0.0337528
S116C	0.216311	0.000873036	0.000390434
N88D	0.21632	0.0202495	0.00905584
S308A	0.216553	1.23693e-05	5.53173e-06
T168D	0.217781	0.0483338	0.0216155
S224G	0.218511	0.00150849	0.000674619
T168F	0.218637	0.015509	0.00693584
N194D	0.219702	0.00155831	0.000696896
W287F	0.219774	0.0179828	0.00804217
V222F	0.220558	0.00996603	0.00445694
S308D	0.220617	4.04005e-05	1.80677e-05
S84T	0.220707	0.000743658	0.000332574
I48L	0.221377	0.000523646	0.000234181
A78N	0.221918	0.00846371	0.00378509
E229A	0.222015	0.0018162	0.000812229
S84Y	0.222553	0.39201	0.175312
T77H	0.223104	0.0287993	0.0128794
I301F	0.223904	0.0392835	0.0175681
T186V	0.227042	0.0161913	0.00724097
E304F	0.227434	0.0711303	0.0318104
V222A	0.227498	0.00469979	0.00210181
S131G	0.228009	0.104636	0.0467945
T196G	0.228641	0.00144869	0.000647874
S308G	0.229647	1.23693e-05	5.53173e-06
S116V	0.229737	0.000620359	0.000277433
E304V	0.231163	0.000924029	0.000413239
Q289L	0.232643	0.0690942	0.0308999
E304D	0.23341	0.00979121	0.00437876
S131E	0.233433	0.0355067	0.0158791
E34C	0.233668	0.000441879	0.000197614
E229F	0.233699	0.00101577	0.000454266
S149C	0.234485	0.000112307	5.02251e-05
H96R	0.235102	0.265413	0.118696
N29K	0.235273	0.068651	0.0307017
A78I	0.236239	0.000665566	0.00029765
Y83F	0.236857	0.0166892	0.00746364
L201F	0.237121	0.0472464	0.0211292
Q220Y	0.239158	0.021382	0.0095623
E34T	0.240778	0.00641069	0.00286695
V257F	0.240885	0.0175716	0.00785824
T39V	0.241111	0.0626672	0.0280256
V33M	0.241144	0.028076	0.012556
D200Y	0.241318	0.0212685	0.00951155
Q289A	0.242223	0.0698594	0.0312421
V275K	0.242245	0.251378	0.11242
A191D	0.242686	0.0135972	0.00608084
T312C	0.242865	0.172665	0.0772182
N140V	0.24328	0.0618276	0.0276502
D211S	0.243837	0.0495176	0.0221449
Q220S	0.245455	0.000131325	5.87304e-05
S127Q	0.246652	0.0738702	0.0330358
S27T	0.247009	0.113982	0.0509742
T186Q	0.247403	0.0396812	0.017746
Q289E	0.249721	0.0630815	0.0282109
T312A	0.250582	0.0107883	0.00482469
E229R	0.250834	0.0450161	0.0201318
Q170L	0.251189	0.641636	0.286949
I301W	0.252642	0.0664683	0.0297255
V150R	0.254725	0.111588	0.0499036
S11L	0.255348	0.00467483	0.00209065
N194M	0.255732	0.0111005	0.0049643
Y171M	0.256271	0.0470598	0.0210458
A251G	0.257251	0	0
I246M	0.257435	0.0777716	0.0347805
S308C	0.259357	1.70499e-05	7.62496e-06
V99I	0.259833	0.116495	0.0520982
D213W	0.263953	0.0145291	0.00649763
I136L	0.264686	0.00244716	0.0010944
Y268L	0.264882	0.0221814	0.00991983
V33C	0.265695	9.81692e-05	4.39026e-05
V33D	0.267145	0.0111502	0.0049865
G73D	0.267332	0.150148	0.0671482
T72E	0.267995	0.248712	0.111227
P68F	0.268313	0.120438	0.0538614
S11T	0.269365	0.00353856	0.00158249
A78F	0.269452	0.0144796	0.00647548
E70C	0.269941	0.0259547	0.0116073
S223D	0.270427	0.0142719	0.00638259
E14S	0.272664	0.285351	0.127613
T39D	0.274233	0.0349796	0.0156433
V33W	0.274863	0.0353432	0.0158059
T236A	0.275734	0.000637254	0.000284989
E70L	0.276438	0.028361	0.0126834
E229Y	0.277343	0.00933538	0.00417491
E311W	0.277904	0.00930645	0.00416197
S131V	0.278533	0.0569088	0.0254504
S11D	0.279603	0.00055303	0.000247323
N29H	0.280248	0.0093861	0.00419759
T39F	0.280437	0.0304413	0.0136138
T72C	0.280581	0.000299951	0.000134142
Q228A	0.280608	0	0
T196N	0.280683	0.0120698	0.00539776
S12W	0.281329	0.114827	0.0513522
W287Q	0.282697	0.0126181	0.00564301
T168S	0.283054	0.0075752	0.00338773
V257Y	0.283376	0.0103031	0.00460767
G181S	0.284468	0.407317	0.182158
A153S	0.285435	0.00490346	0.00219289
T39M	0.286294	0.26575	0.118847
S273A	0.286925	0	0
T39N	0.288542	0.0280044	0.012524
V150E	0.289199	0.0328142	0.014675
S131C	0.292144	0.0174203	0.00779059
S11E	0.293181	0.00620219	0.0027737
T77C	0.293565	0.00028941	0.000129428
D145F	0.294069	0.0330493	0.0147801
S131A	0.294407	0	0
S240E	0.294839	0.000335469	0.000150026
D233F	0.295546	0.0224144	0.010024
A254I	0.295609	0.00795704	0.0035585
S113V	0.295651	0.0027583	0.00123355
S131H	0.296422	0.0568603	0.0254287
T39Y	0.296697	0.105039	0.0469748
S131T	0.296851	0.0180643	0.00807858
S223N	0.296951	0.13564	0.0606599
S127F	0.298465	0.111562	0.0498922
A78D	0.299367	0.00389983	0.00174406
T196A	0.299597	0.00144876	0.000647906
T312N	0.299732	0.0104016	0.00465174
D76E	0.300748	0.72934	0.326171
Q220F	0.301114	0.0132896	0.00594329
D290I	0.304899	0.00440644	0.00197062
S113T	0.305571	0.00277146	0.00123943
E34W	0.305623	0.0894936	0.0400228
K93Q	0.306877	0.166242	0.0743456
N194H	0.307563	0.0301802	0.013497
A284S	0.309004	0.142414	0.0636895
A254E	0.30914	0.139822	0.0625304
N140S	0.309952	0.276875	0.123822
D133S	0.31155	0.0167844	0.00750621
S212G	0.311706	0.00043575	0.000194873
I90L	0.31273	0.373472	0.167022
N194E	0.312889	0.0254695	0.0113903
D233N	0.313934	0.0247355	0.0110621
N29Q	0.314005	0.11579	0.0517831
S223R	0.314068	0.0650745	0.0291022
L154M	0.314439	0.0139421	0.00623508
A153D	0.315159	0.0175672	0.00785631
V150Q	0.315408	0.102125	0.0456715
V257S	0.315526	0.0247779	0.011081
A78Y	0.315605	0.0133057	0.0059505
S12D	0.315608	0.0150298	0.00672152
Q239W	0.316169	0.121882	0.0545073
S18A	0.316287	0.00303523	0.0013574
W287K	0.316513	0.217727	0.0973703
Y179Q	0.31672	0.0245553	0.0109814
D145Y	0.316791	0.0259862	0.0116214
S113G	0.317673	0.00233219	0.00104299
D160N	0.319695	0.0117096	0.00523668
E14T	0.319743	0.0161065	0.00720304
V222Y	0.320384	0.0251862	0.0112636
D233A	0.32159	0.00474029	0.00211992
V222R	0.325448	0.0558714	0.0249865
T186C	0.326693	0.00963178	0.00430746
E85D	0.3271	0.00408556	0.00182712
E304H	0.327478	0.0656007	0.0293375
T312L	0.32812	0.017324	0.00774754
T39C	0.329552	0.00013486	6.03114e-05
V152I	0.330439	0.00146123	0.000653482
T225H	0.330625	0.127361	0.0569574
Y313F	0.330795	0.0392312	0.0175447
S27V	0.331641	0.00924993	0.00413669
S21C	0.331733	0.143718	0.0642727
L134K	0.331942	0.0209504	0.00936933
Q119S	0.332137	0.020086	0.00898272
S27W	0.332407	0.0435951	0.0194963
S273Q	0.335265	0.0150273	0.00672041
E81H	0.335773	0.0547585	0.0244888
T186S	0.33751	0.0010968	0.000490502
N132I	0.337654	0.0129128	0.0057748
V222C	0.338529	0.00468165	0.0020937
Q170V	0.33876	1.50152	0.671501
T44C	0.339159	0.00190794	0.000853255
T39W	0.340282	0.221637	0.0991192
D51C	0.340308	0.0640374	0.0286384
E304Y	0.340379	0.030469	0.0136261
V231T	0.340578	0.104908	0.0469163
N29R	0.340811	0.0409786	0.0183262
D290E	0.341227	0.00596856	0.00266922
S308H	0.341789	0.00785056	0.00351088
Y179L	0.341954	0.00210196	0.000940026
A78G	0.342035	4.78519e-05	2.14e-05
D213H	0.34397	0.00854101	0.00381966
S113I	0.344251	0.0112942	0.00505094
V222W	0.345156	0.0592464	0.0264958
A165G	0.345318	0	0
D200L	0.345338	0.0104824	0.00468788
L266M	0.347838	0.0337906	0.0151116
D233I	0.34868	0.0554256	0.0247871
V257H	0.348926	0.00694904	0.0031077
G264D	0.349127	0.0132411	0.00592158
T168Y	0.352356	0.0519722	0.0232427
Q220V	0.35433	0.0116437	0.00520724
S218T	0.354633	0.0172547	0.00771653
S18T	0.355146	0.0439605	0.0196597
S74W	0.356759	0.0259426	0.0116019
S218A	0.356927	0	0
S27D	0.357226	0.00441817	0.00197586
D290A	0.361364	0.0894001	0.039981
A153H	0.361475	0.0233488	0.0104419
K243M	0.36263	0.132904	0.0594363
A178D	0.363026	0.0280826	0.0125589
H144T	0.364464	0.0299801	0.0134075
G245S	0.366418	0.0858379	0.0383879
W183Q	0.369002	0.0174686	0.00781219
L277F	0.369569	0.0555614	0.0248478
A270G	0.370153	0.000347593	0.000155448
T225R	0.370256	0.0671826	0.030045
E70A	0.372894	0.0256384	0.0114658
N194T	0.375794	0.000441662	0.000197517
P286M	0.376082	0.0366529	0.0163917
D200W	0.376286	0.0365212	0.0163328
S113A	0.378481	0.00233198	0.00104289
I309Y	0.379263	0.188714	0.0843957
A45V	0.379629	0.021444	0.00959006
T236E	0.380628	0.0256915	0.0114896
V150Y	0.38166	0.191757	0.0857564
I87M	0.382099	0.0555393	0.0248379
Q220C	0.382665	0.00440391	0.00196949
T91I	0.383244	0.236719	0.105864
I301D	0.38407	0.00540921	0.00241907
A191T	0.385011	0.00204183	0.000913135
F104K	0.38698	0.373279	0.166935
I292R	0.389085	0.342792	0.153301
E142Q	0.390473	0.0514557	0.0230117
S199Q	0.390739	0.0109204	0.00488375
V150C	0.392201	0.000945997	0.000423063
I202M	0.393122	0.134042	0.0599454
Y293F	0.394632	0.0132185	0.00591147
A254H	0.396414	0.0848799	0.0379595
I50R	0.397799	0.287534	0.128589
D200M	0.399458	0.00120723	0.000539891
W287M	0.40404	0.0447336	0.0200055
M265L	0.404154	0.0708791	0.0316981
N194V	0.405347	0.00107652	0.000481436
Q47K	0.405399	0.155343	0.0694713
A191N	0.40634	0.0198419	0.00887356
T44G	0.406622	0.0202309	0.00904753
T312H	0.40947	0.0457168	0.0204452
T225F	0.410581	0.146515	0.0655233
Y188A	0.411113	0.00759371	0.00339601
T115N	0.411142	0.0745402	0.0333354
D213T	0.412463	0.012701	0.00568008
H96A	0.413015	0	0
S123E	0.414512	0.073912	0.0330545
L134M	0.416543	0.0268287	0.0119982
E148N	0.419531	0.0386403	0.0172805
E229N	0.421765	0.00539999	0.00241495
D145N	0.42203	0.00523687	0.002342
D233Y	0.422578	0.0590717	0.0264177
T236V	0.423407	0.000680103	0.000304152
W287Y	0.424214	0.0482122	0.0215612
V150F	0.424372	0.0576835	0.0257969
H96N	0.424874	0.00168032	0.000751463
D233T	0.425046	0.0241219	0.0107876
A191H	0.426471	0.00912511	0.00408087
G73N	0.427994	0.504702	0.22571
E85H	0.428848	0.00448045	0.00200372
E85N	0.430353	0.00152998	0.00068423
H96C	0.430542	0.107132	0.0479107
Y108F	0.430667	0.0289472	0.0129456
N272F	0.431205	0.444551	0.198809
E81D	0.431395	0.0286557	0.0128152
T225Q	0.433085	0.0626347	0.0280111
V33E	0.434411	0.00374635	0.00167542
T196H	0.434414	0.0486418	0.0217533
E271T	0.435087	0.00519116	0.00232156
T36A	0.435529	0.000327776	0.000146586
E85T	0.435975	0.00151293	0.000676601
E249R	0.436515	0.69699	0.311704
N241Q	0.437912	0.0196563	0.00879057
I301V	0.438779	0.00672428	0.00300719
S123C	0.438799	0.0292518	0.0130818
N194C	0.439	0.000580006	0.000259387
A254S	0.439112	0.00798968	0.0035731
V257G	0.44012	0.000583167	0.0002608
T168G	0.440391	0.007538	0.0033711
Q47A	0.440811	0.154939	0.0692907
Q119E	0.441247	0.116264	0.051995
Y171I	0.444962	0.0456839	0.0204305
A45C	0.447581	0.0258986	0.0115822
V86M	0.44767	0.19576	0.0875466
D138F	0.449635	0.0266013	0.0118965
Q228I	0.450118	0.037101	0.0165921
E229S	0.450131	0.00302514	0.00135288
L201R	0.450413	0.0515775	0.0230661
Q289D	0.450835	0.0748109	0.0334564
A52C	0.452428	0.00037138	0.000166086
S280T	0.453328	0.368743	0.164907
V150T	0.453687	0.000473602	0.000211801
E14C	0.454478	0.0238632	0.0106719
L210F	0.45462	0.207202	0.0926637
V33S	0.455771	0.11613	0.051935
T312F	0.456103	0.0238742	0.0106769
S114T	0.456171	0.255666	0.114337
A78W	0.457031	0.0176857	0.00790929
W282F	0.459387	0.100942	0.0451427
Q239V	0.460868	0.0140337	0.00627608
A52F	0.460929	0.756339	0.338245
E260V	0.461733	0.0163338	0.00730468
T168W	0.462589	0.0219479	0.00981539
Q239Y	0.462717	0.197367	0.088265
V222D	0.464458	0.00445841	0.00199386
N194S	0.46807	0.000279847	0.000125152
I309K	0.468392	0.192563	0.0861168
T39K	0.474768	0.0574916	0.025711
A270S	0.475136	0.000150616	6.73577e-05
V232H	0.476853	0.0148543	0.00664306
N132K	0.477001	0.124041	0.0554726
Q228E	0.477565	0.0147756	0.00660786
T91N	0.478833	0.0275928	0.0123399
D133V	0.479242	0.0160613	0.00718282
A254F	0.479374	0.179204	0.0801425
G181D	0.480102	0.0774813	0.0346507
E14H	0.481733	0.0288671	0.0129098
T186W	0.482451	0.058171	0.0260149
F80L	0.485683	0.13929	0.0622923
K243R	0.48605	0.137861	0.0616535
E142S	0.486388	0.037722	0.0168698
T225K	0.488618	0.0634576	0.0283791
E34N	0.489288	0.00152911	0.000683839
E20H	0.490143	0.541159	0.242013
A45S	0.491528	4.14126e-05	1.85203e-05
G92N	0.492135	0.0292113	0.0130637
K93T	0.49407	0.159327	0.0712533
V193C	0.494419	0.0698193	0.0312242
L244K	0.495378	0.0447652	0.0200196
F104G	0.495563	0.0140554	0.00628575
D147P	0.495569	0.0129723	0.0058014
G92F	0.496726	0.0670423	0.0299822
D145M	0.497044	0.0457532	0.0204615
E142G	0.499378	0.0452796	0.0202497
V231I	0.499919	0.144373	0.0645658
S223K	0.500391	0.0355757	0.0159099
E229D	0.500706	0.000860934	0.000385022
S84G	0.50145	0.000539337	0.000241199
T186H	0.503738	0.00828896	0.00370693
Q208C	0.505368	0.00498985	0.00223153
T120G	0.507069	0.000491049	0.000219604
Y107F	0.507533	0.0145312	0.00649854
Q220N	0.507977	0.212708	0.095126
E263T	0.508245	0.00780807	0.00349187
W183F	0.508898	0.167524	0.0749189
I48W	0.509483	0.0147406	0.00659222
E20D	0.509744	0.63253	0.282876
V275R	0.510785	0.404908	0.18108
A78V	0.51139	5.46855e-05	2.44561e-05
T168H	0.512082	0.0495885	0.0221766
S273M	0.512121	0.155712	0.0696367
L201N	0.512863	0.0306621	0.0137125
F104N	0.514261	0.0253039	0.0113163
N29F	0.51434	0.136454	0.061024
T236N	0.514776	0.00346017	0.00154743
D267C	0.51845	0.0573012	0.0256259
A191S	0.522865	0.0260903	0.0116679
L201Y	0.523323	0.137465	0.0614763
A95S	0.524015	0.0880947	0.0393971
E14N	0.524039	0.0235064	0.0105124
A270Y	0.524963	0.00751229	0.0033596
T217D	0.525869	0.0041186	0.00184189
V257C	0.526694	0.0066902	0.00299195
E304C	0.528138	0.0588131	0.026302
Q119T	0.529028	0.0167949	0.00751091
L134R	0.530102	0.566629	0.253404
G73A	0.530151	0	0
E304N	0.531022	0.0168888	0.00755291
E70H	0.531566	0.0250319	0.0111946
Q239N	0.532054	0.00486684	0.00217652
I172L	0.532577	0.0502068	0.0224532
N299D	0.532978	0.00329112	0.00147183
Q239T	0.533624	0.0169476	0.0075792
E20S	0.533731	0.620388	0.277446
I48F	0.533838	0.0183777	0.00821876
Q289T	0.535526	0.0779454	0.0348582
P68Y	0.539874	0.878417	0.39284
Y179G	0.540565	0.000940006	0.000420383
T115S	0.540676	0.000364906	0.000163191
S27N	0.541582	0.0507497	0.022696
A52S	0.54159	0.00030505	0.000136423
Q170P	0.542167	0.0139948	0.00625866
H144S	0.542805	0.116217	0.0519739
A254G	0.543058	0	0
E229V	0.544841	0.00237576	0.00106247
D145L	0.546131	0.0288442	0.0128995
G245C	0.546597	0.104566	0.0467634
S123T	0.547357	0.134122	0.0599812
Y313W	0.54742	0.118732	0.0530985
T36C	0.548358	0.00070389	0.000314789
Y143P	0.549811	0.0204413	0.00914163
V33A	0.550148	0.0015437	0.000690366
I48Q	0.550708	0.028173	0.0125994
W183I	0.551767	0.0110515	0.00494237
Q220A	0.552713	0.00117043	0.000523434
S127Y	0.553084	0.0601219	0.0268873
G92W	0.553485	0.21791	0.0974521
P111I	0.55394	0.00197689	0.000884093
M66L	0.554996	0.134379	0.0600963
E263G	0.555725	0.0211201	0.00944518
T312Y	0.555908	0.0174252	0.00779278
D267S	0.556406	0.0826997	0.0369844
A254Y	0.557891	0.151786	0.0678809
D219G	0.559694	0.0247607	0.0110733
D160H	0.55994	0.16153	0.0722385
E70N	0.55999	0.260948	0.1167
E70G	0.561151	0.0259695	0.0116139
S84N	0.562382	0.26412	0.118118
E260D	0.563072	0.03205	0.0143332
Q220H	0.564593	0.0947575	0.0423769
A52T	0.564727	0.0157772	0.00705576
S127E	0.565754	0.0362745	0.0162224
P286K	0.568299	0.0800556	0.035802
E24W	0.569642	0.0184863	0.00826731
L62K	0.570251	0.348252	0.155743
T225L	0.570898	0.044438	0.0198733
S294T	0.571708	0.00208509	0.00093248
Q47E	0.572166	0.0482259	0.0215673
T225Y	0.572687	0.200207	0.0895355
D160C	0.572694	0.043118	0.0192829
E14D	0.573424	0.0366554	0.0163928
T196D	0.573655	0.00166264	0.000743556
T115H	0.574243	0.0704681	0.0315143
D145G	0.574575	0.0304683	0.0136258
D100G	0.575432	0.125571	0.0561573
D211F	0.577192	0.0605715	0.0270884
Y179W	0.578076	0.01637	0.0073209
D211N	0.579478	0.0563946	0.0252204
I292L	0.579706	0.248862	0.111294
V226L	0.579902	0.658848	0.294646
D51T	0.581443	0.137892	0.0616671
V59L	0.58279	0.32503	0.145358
G92Y	0.583227	0.142243	0.0636131
E85C	0.585291	0.00116254	0.000519905
E271V	0.585707	0.00450393	0.00201422
M206L	0.58595	0.159557	0.0713559
L134H	0.58778	0.0609007	0.0272356
S305C	0.589488	0.0682703	0.0305314
D219S	0.589554	0.241866	0.108166
S240V	0.591442	0.000475643	0.000212714
A78H	0.593481	0.00924463	0.00413432
I301G	0.595134	0.0068153	0.0030479
T312W	0.59515	0.0336225	0.0150364
E81V	0.598927	0.00599822	0.00268248
Q119C	0.599218	0.0147981	0.0066179
V135I	0.601159	0.0240547	0.0107576
N55M	0.601188	0.0743175	0.0332358
V193E	0.601602	0.0926177	0.0414199
V232A	0.602093	0.00963661	0.00430962
S273G	0.602356	0.000122089	5.46e-05
D145A	0.603662	0.0361674	0.0161746
T110G	0.603887	0.000956204	0.000427627
D145E	0.605105	0.00847617	0.00379066
S305E	0.605203	0.0716508	0.0320432
D51G	0.60563	0.124697	0.0557663
L277Y	0.60589	0.0335231	0.014992
G92I	0.606145	0.0235812	0.0105458
D219H	0.609151	0.0148651	0.00664786
V232D	0.611227	0.284412	0.127193
A270Q	0.611516	0.187552	0.0838758
S74T	0.611853	0.000102004	4.56175e-05
S199K	0.611896	0.250314	0.111944
L201C	0.611972	0.0255709	0.0114357
G73K	0.61577	0.211572	0.0946179
D211T	0.617823	0.0452824	0.0202509
E271D	0.618254	0.00805374	0.00360174
S240C	0.618659	0.000488834	0.000218613
D290S	0.61925	0.0410425	0.0183548
I309V	0.619375	0.00581471	0.00260042
I48Y	0.62003	0.0190625	0.008525
E304G	0.62148	0.0213803	0.00956155
W183K	0.624315	0.0422685	0.018903
E85G	0.625142	0.00128237	0.000573495
Q220E	0.625235	0.00714119	0.00319364
D117G	0.626599	0.00806172	0.00360531
D233V	0.627394	0.0167524	0.00749192
T124S	0.628612	0.0200969	0.00898759
Y171V	0.62894	0.0202642	0.0090624
S27G	0.630511	0	0
N29Y	0.631831	0.177416	0.0793429
A254W	0.631879	0.220268	0.0985068
G73F	0.632833	0.379823	0.169862
N55H	0.633117	0.353028	0.157879
G92T	0.633784	0.00373643	0.00167098
F137Y	0.634706	0.107293	0.0479831
E81C	0.63539	0.0105031	0.00469714
E260C	0.635745	0.0845356	0.0378055
E34A	0.637247	0	0
T217E	0.638192	0.0219062	0.00979673
K93C	0.63858	0.158753	0.0709967
W183A	0.638945	0.0229189	0.0102497
I246L	0.639524	0.134494	0.0601474
Q47D	0.639699	0.0411107	0.0183852
L244W	0.640169	0.00728819	0.00325938
Q47N	0.642238	0.229484	0.102628
Q128S	0.642421	0.0420949	0.0188254
F104H	0.643056	0.0156263	0.00698831
Q239A	0.643401	0.013298	0.00594704
H102Y	0.644515	0.0216495	0.00968195
K130P	0.644781	0.0892852	0.0399296
F104R	0.645015	0.0741172	0.0331462
E229H	0.648004	0.00271882	0.00121589
A182L	0.648038	0.763977	0.341661
A234S	0.649348	0.0026019	0.0011636
A270W	0.649663	0.0497258	0.0222381
N132R	0.650722	0.371572	0.166172
F104L	0.652362	0.0333609	0.0149194
Q170N	0.652704	0.00425827	0.00190436
Q289I	0.655898	0.119314	0.0533587
V222N	0.656343	0.00898722	0.00401921
V193I	0.657209	0.0591996	0.0264749
S127T	0.658534	0.0409007	0.0182913
T236C	0.659997	0.000649775	0.000290588
T39A	0.661102	0.0261966	0.0117155
L201H	0.661613	0.324184	0.14498
H144V	0.665407	0.165068	0.0738207
D133T	0.665419	0.0184805	0.00826474
D290T	0.665732	0.0114049	0.00510044
V150N	0.666216	0.00701883	0.00313892
S218G	0.667727	0.00187114	0.0008368
S223A	0.671599	0.00329122	0.00147188
N29L	0.671678	0.0205049	0.00917007
Q208V	0.672413	0.398256	0.178106
S273L	0.673043	0.00247715	0.00110782
T44P	0.67389	0.352586	0.157681
V152T	0.676572	0.0195226	0.00873076
P111E	0.676936	0.0421098	0.0188321
S18P	0.679193	0.0495255	0.0221485
A182V	0.679241	0.135257	0.0604887
G92V	0.679271	0.000652379	0.000291753
S11I	0.680442	3.94867e-05	1.7659e-05
Q128V	0.681504	0.0423135	0.0189232
S215H	0.681638	0.0716908	0.0320611
S123H	0.682104	0.0795983	0.0355974
L134F	0.682726	0.0242922	0.0108638
G82M	0.683721	0.120743	0.0539979
S11V	0.685756	0.000321353	0.000143713
W183R	0.686395	0.136993	0.061265
F104Q	0.686603	0.0230303	0.0102994
E81G	0.6867	0.00546295	0.0024431
A95N	0.687443	0.0474854	0.0212361
M63I	0.687601	0.370547	0.165713
I246V	0.688927	0.00695826	0.00311183
I172V	0.68949	0.0208088	0.00930599
Q119Y	0.691322	0.220748	0.0987215
Y188W	0.692041	0.240841	0.107707
Q47R	0.692106	0.200038	0.0894597
L244F	0.692372	0.0486864	0.0217732
V174L	0.692605	0.240105	0.107378
I202V	0.693665	0.0228945	0.0102387
Q47T	0.693845	0.112097	0.0501312
S294G	0.694308	0.00166937	0.000746563
W287H	0.694702	0.192611	0.0861384
W288L	0.694924	0.0671044	0.03001
Q47G	0.698288	0.331349	0.148184
N255S	0.708627	0.104602	0.0467795
[truncated: 3,777 more rows]
