# Supplementary material for: Exploring sequence- and structure-based fitness landscapes to enhance thermal resistance and activity of endoglucanase II with minimal experimental effort
Source: Royal Society of Chemistry journal article supplement (doi:10.1039/d5cb00013k), 2025-01-01
Supplement: d5cb00013k4.pdf [file d5cb00013k4.pdf]

# Supplementary information

## Exploring Sequence- and Structure-based Fitness Landscapes to Enhance Thermal Resistance and Activity of Endoglucanase II with Minimal Experimental Effort

Atul Kumar<sup>1</sup>, Alexander-Maurice Illig<sup>1</sup>, Nicolas de la Vega Guerra<sup>1</sup>, Francisca C. Leiva<sup>1</sup>, Mehdi D. Davari<sup>2</sup>,  
Ulrich Schwaneberg<sup>1,\*</sup>

<sup>1</sup>*Institute of Biotechnology, RWTH Aachen University, Worringerweg 3, Aachen, 52074, Germany*

<sup>2</sup>*Department of Bioorganic Chemistry, Leibniz Institute of Plant Biochemistry, Weinberg 3, Halle, 06120, Germany*

*\*Corresponding author: [u.schwaneberg@biotec.rwth-aachen.de](mailto:u.schwaneberg@biotec.rwth-aachen.de)*

## Contents

|           |                                                                                                                                                   |           |
|-----------|---------------------------------------------------------------------------------------------------------------------------------------------------|-----------|
| <b>1</b>  | <b>Improvements in thermostability of cellulases through protein engineering strategies</b>                                                       | <b>3</b>  |
| <b>2</b>  | <b>Plasmid construction and mutagenesis of EGLII</b>                                                                                              | <b>4</b>  |
| 2.1       | Site-directed mutagenesis . . . . .                                                                                                               | 5         |
| 2.1.1     | Primers used for site-directed mutagenesis . . . . .                                                                                              | 5         |
| <b>3</b>  | <b>EVmutation: A Case Study on <i>Bacillus subtilis</i> Lipase A (BSLA)</b>                                                                       | <b>8</b>  |
| 3.1       | Prediction of BSLA variants . . . . .                                                                                                             | 8         |
| 3.2       | Plasmid Construction and Mutagenesis . . . . .                                                                                                    | 8         |
| 3.2.1     | Primers used for site-directed mutagenesis . . . . .                                                                                              | 10        |
| 3.3       | Cloning and expression of BSLA variants . . . . .                                                                                                 | 10        |
| 3.4       | Enzymatic activity of BSLA variants after thermal stress . . . . .                                                                                | 11        |
| 3.5       | Half-life of BSLA variants . . . . .                                                                                                              | 11        |
| <b>4</b>  | <b>Correlation between predicted energy (<math>\Delta\Delta G</math> and <math>\Delta E</math>) with <math>T_m</math> and normalized activity</b> | <b>13</b> |
| <b>5</b>  | <b>Comparative analysis of wild-type EGLII and top-performing single- and double-substituted variant</b>                                          | <b>14</b> |
| <b>6</b>  | <b>Oligomerization analysis of wild-type EGLII and top-performing single- and double-substituted variant</b>                                      | <b>15</b> |
| 6.1       | SDS PAGE analysis . . . . .                                                                                                                       | 15        |
| 6.2       | Native-PAGE analysis . . . . .                                                                                                                    | 15        |
| 6.3       | DLS measurements . . . . .                                                                                                                        | 16        |
| 6.3.1     | DLS under native buffer conditions . . . . .                                                                                                      | 17        |
| 6.3.2     | DLS after thermal stress . . . . .                                                                                                                | 17        |
| 6.3.3     | DLS under high salt conditions . . . . .                                                                                                          | 17        |
| <b>7</b>  | <b>SDS-PAGE analysis of predicted EGLII variants from FoldX and EVmutation (single and double substituted)</b>                                    | <b>19</b> |
| <b>8</b>  | <b>Half-lives of predicted EGLII variants from FoldX and EVmutation (single and double substituted)</b>                                           | <b>20</b> |
| <b>9</b>  | <b>Enzymatic activity of predicted EGLII variants without thermal stress</b>                                                                      | <b>22</b> |
| <b>10</b> | <b>Enzymatic activity of predicted EGLII variants after thermal stress at 76 °C</b>                                                               | <b>23</b> |
| <b>11</b> | <b>Thermal unfolding curves of predicted EGLII variants from FoldX and EVmutation (single and double substituted)</b>                             | <b>24</b> |
| <b>12</b> | <b>ConSurf analysis of predicted EGLII positions (FoldX and EVmutation)</b>                                                                       | <b>36</b> |
| <b>13</b> | <b>References</b>                                                                                                                                 | <b>37</b> |

## List of Tables

|   |                                                                                                                                                                                                                                       |    |
|---|---------------------------------------------------------------------------------------------------------------------------------------------------------------------------------------------------------------------------------------|----|
| 1 | Overview of protein engineering approaches employed to improve the thermostability of cellulases                                                                                                                                      | 3  |
| 2 | Sequences of primers or predicted EGLII variants, designed using Clone Manager 9. . . . .                                                                                                                                             | 5  |
| 3 | Top 20 BSLA variants predicted by EVmutation. . . . .                                                                                                                                                                                 | 8  |
| 4 | Sequences of primers for predicted BSLA variants, designed using Clone Manager 9. . . . .                                                                                                                                             | 10 |
| 5 | Estimated half-lives of BSLA variants at 50 °C. . . . .                                                                                                                                                                               | 12 |
| 6 | Pearson and Spearman correlation coefficients between predicted energy values ( $\Delta\Delta G, \Delta E_{single}$ and $\Delta E_{double}$ ) and normalized activity after thermal stress and melting temperature ( $T_m$ ). . . . . | 13 |
| 7 | Half-lives of the predicted EGLII variants by FoldX and EVmutation. . . . .                                                                                                                                                           | 20 |
| 8 | Conservation and exposure of predicted EGLII positions . . . . .                                                                                                                                                                      | 36 |

## List of Figures

|    |                                                                                                                                                                                          |    |
|----|------------------------------------------------------------------------------------------------------------------------------------------------------------------------------------------|----|
| 1  | Representation of plasmid construct of EGLII . . . . .                                                                                                                                   | 4  |
| 2  | Plasmid map of BSLA construct . . . . .                                                                                                                                                  | 9  |
| 3  | Normalized activity of BSLA variants relative to wild type before (A) and after thermal stress (B)                                                                                       | 11 |
| 4  | Half-lives of the predicted BSLA variants . . . . .                                                                                                                                      | 12 |
| 5  | Correlation of predictive energy values from FoldX and EVmutation with experimentally determined $T_m$ (A) and normalized enzymatic activity after thermal stress at 75 °C (B) . . . . . | 13 |
| 6  | Thermal performance comparison of wild-type EGLII with the top-performing single-substitution variant Q289G and double-substitution variant S180T/Q289G. . . . .                         | 14 |
| 7  | SDS-PAGE analysis of purified EGLII WT(WT), Q289G (1) and S180T/Q289G (2) under reducing and non-reducing conditions . . . . .                                                           | 15 |
| 8  | Native PAGE analysis of EGLII wild type (WT), Q289G (1) and S180T/Q289G (2) . . . . .                                                                                                    | 16 |
| 9  | Dimensions of the crystallographic structure of EGLII monomer . . . . .                                                                                                                  | 16 |
| 10 | Estimated hydrodynamic diameters of EGLII variants under native buffer conditions (Range 1) . .                                                                                          | 17 |
| 11 | Estimated hydrodynamic diameters of EGLII variants after one hour incubation at 75 °C (Range 1)                                                                                          | 17 |
| 12 | Estimated hydrodynamic diameters of EGLII variants in presence of high salt concentrations (Range 1) . . . . .                                                                           | 18 |
| 13 | SDS-PAGE analysis of predicted variants from FoldX and EVmutation (single- and double-substituted)                                                                                       | 19 |
| 14 | SDS-PAGE analysis of EGLII wild-type and variants T110N and N299S. . . . .                                                                                                               | 19 |
| 15 | Half-lives of single-substituted EGLII variants predicted by FoldX. . . . .                                                                                                              | 20 |
| 16 | Half-lives of single-substituted EGLII variants predicted by EVmutation . . . . .                                                                                                        | 21 |
| 17 | Half-lives of double-substituted EGLII variants predicted by EVmutation . . . . .                                                                                                        | 21 |
| 18 | Normalized enzymatic activity of FoldX-predicted single-substituted variants without thermal stress.                                                                                     | 22 |
| 19 | Normalized enzymatic activity of EVmutation-predicted single-substituted variants without thermal stress. . . . .                                                                        | 22 |
| 20 | Normalized enzymatic activity of EVmutation-predicted double-substituted variants without thermal stress. . . . .                                                                        | 22 |
| 21 | Normalized enzymatic activity of FoldX-predicted single-substituted variants after 1-hour incubation at 76 °C. . . . .                                                                   | 23 |
| 22 | Normalized enzymatic activity of EVmutation-predicted single-substituted variants after 1-hour incubation at 76 °C. . . . .                                                              | 23 |
| 23 | Normalized enzymatic activity of EVmutation-predicted double-substituted variants after 1-hour incubation at 76 °C. . . . .                                                              | 23 |
| 24 | Thermal unfolding curves of FoldX single-substituted variants . . . . .                                                                                                                  | 24 |
| 25 | Thermal unfolding curves of FoldX single-substituted variants . . . . .                                                                                                                  | 25 |
| 26 | Thermal unfolding curves of FoldX single-substituted variants . . . . .                                                                                                                  | 26 |
| 27 | Thermal unfolding curves of FoldX single-substituted variants . . . . .                                                                                                                  | 27 |
| 28 | Thermal unfolding curves of EVmutation single-substituted variants . . . . .                                                                                                             | 28 |
| 29 | Thermal unfolding curves of EVmutation single-substituted variants . . . . .                                                                                                             | 29 |
| 30 | Thermal unfolding curves of EVmutation single-substituted variants . . . . .                                                                                                             | 30 |
| 31 | Thermal unfolding curves of EVmutation single-substituted variants . . . . .                                                                                                             | 31 |
| 32 | Thermal unfolding curves of EVmutation double-substituted variants . . . . .                                                                                                             | 32 |
| 33 | Thermal unfolding curves of EVmutation double-substituted variants . . . . .                                                                                                             | 33 |
| 34 | Thermal unfolding curves of EVmutation double-substituted variants . . . . .                                                                                                             | 34 |
| 35 | Thermal unfolding curves of EVmutation double-substituted variants . . . . .                                                                                                             | 35 |
| 36 | ConSurf analysis of EGLII . . . . .                                                                                                                                                      | 36 |

# 1. Improvements in thermostability of cellulases through protein engineering strategies

Table 1: Overview of protein engineering approaches employed to improve the thermostability of cellulases

| Strategy           | Enzyme                                                                                                      | Improvement                                                                                                                                                                                                                     | Reference   |
|--------------------|-------------------------------------------------------------------------------------------------------------|---------------------------------------------------------------------------------------------------------------------------------------------------------------------------------------------------------------------------------|-------------|
| Directed evolution | <i>Trichoderma reesei</i> endoglucanase III (Cel12A)                                                        | Improved pH stability (4.4-8.8), thermotolerance (fully active at 55 °C for 30 minutes), and 1.4-fold increase in catalytic efficiency                                                                                          | [1]         |
| Directed evolution | <i>Clostridium thermocellum</i> Cel8A                                                                       | S329G led to 7 °C increase in $T_m$ and 8-fold improvement in $t_{1/2}$ at 85 °C                                                                                                                                                | [2]         |
| Directed evolution | <i>Chaetomium thermophilum</i> cellobiohydrolase II                                                         | Higher optimum temperature (60 °C), improved pH stability (up to pH 6), and maintained more than 50% activity after 1-hour incubation at 80 °C                                                                                  | [3]         |
| Directed evolution | Chimeric fungal family 6 cellobiohydrolase (HJPlus)                                                         | Thermostable Cel6A variant with a half-life ( $t_{1/2}$ ) of 280 minutes at 75 °C and $T_{50}$ of 80.1 °C, a 15 °C increase over <i>Humicola insolens</i> Cel6A and a 20 °C increase over <i>Hypocrea jecorina</i> Cel6A        | [4]         |
| Directed evolution | $\beta$ -glucosidase Ks5A7 from a Kusaya gravity metagenome                                                 | 8640-fold improvement in half-life at 50 °C                                                                                                                                                                                     | [5]         |
| Directed evolution | <i>Clostridium thermocellum</i> $\beta$ -glucosidase                                                        | Increase in $T_m$ by 6.4 °C                                                                                                                                                                                                     | [6]         |
| Rational design    | <i>Melanocarpus albomyces</i> cellobiohydrolase Cel7B                                                       | Introduction of an additional disulphide bridge increased $T_m$ up to 4 °C and improved activity towards microcrystalline cellulose at 75 °C                                                                                    | [7]         |
| Rational design    | <i>Thermotoga maritima</i> $\beta$ -1,4-endoglucanase Cel12B                                                | Rational design based on sequence alignment and homology modelling led to mutants maintaining 80 % and 90.5 % of initial activity after 8 hours at 80 °C                                                                        | [8]         |
| Rational design    | <i>Chaetomium thermophilum</i> $\beta$ -1,4-endoglucanase CTendo45                                          | Improved residual activity over a range of 60 to 90 °C through structure-based rational design, involving mutation of conserved and noncatalytic residues, optimization of N-glycosylation sites, and combining both approaches | [9, 10, 11] |
| Rational design    | <i>Penicillium verruculosum</i> endoglucanase II                                                            | Introduction of disulphide bridges led to almost 20 % increase in specific activity and improved residual activity at 80 °C                                                                                                     | [12]        |
| Rational design    | <i>Penicillium verruculosum</i> endoglucanase II                                                            | Substitution of residues with proline improved $t_{1/2}$ by 2.4-fold at 80 °C                                                                                                                                                   | [13]        |
| Rational design    | <i>Penicillium verruculosum</i> Cel7A cellobiohydrolase                                                     | Substitution of residues with proline improved $t_{1/2}$ by 3.4 times at 60 °C                                                                                                                                                  | [14]        |
| Combined strategy  | Various fungal glycosyl hydrolase Cel7A genes                                                               | Biased clique shuffling created a library of chimeras with 86% activity and 51 showing improved thermostability                                                                                                                 | [15]        |
| Combined strategy  | Consensus mutation library from five thermophilic fungal cellobiohydrolase II (CBH2)                        | Improved thermostability of <i>Phanerochaete chrysosporium</i> CBH2, retaining activity at 50 °C for 72 hours                                                                                                                   | [16]        |
| Combined strategy  | <i>Hypocrea pseudokoningii</i> Cel7B endoglucanase                                                          | Enhanced $T_m$ by 10 °C through comparison with thermostable homologues                                                                                                                                                         | [17]        |
| Combined strategy  | Chimeric enzyme from cellulases of <i>Geobacillus</i> sp. 70PC53 GsCelA and <i>Bacillus</i> homolog BsCel5A | Created using SCHEMA, retains 40% activity at 90 °C                                                                                                                                                                             | [18]        |
| Combined strategy  | <i>Hypocrea jecorina</i> Cel7A cellobiohydrolase                                                            | Increased $T_m$ by 10.4 °C and 44-fold half-life increase using structural and dynamic approaches                                                                                                                               | [19]        |
| Combined strategy  | Chimeric enzymes from thermophilic GH5 endoglucanase Egl5A and mesophilic <i>Stegonsporium opalus</i> Cel5  | Two hybrids showed significant increases in $T_{opt}$ (10 and 20 °C), $T_{50}$ (15 and 19 °C), $T_m$ (16.5 and 22.9 °C), and $t_{1/2}$ (240- and 650-fold at 55 °C)                                                             | [20]        |
| Combined strategy  | <i>Penicillium verruculosum</i> endo- $\beta$ -1,4-glucanase                                                | KnowVolution strategy yields a variant with a 5.5-fold longer half-life at 75 °C and 7.7 °C higher $T_m$                                                                                                                        | [21]        |
| Combined strategy  | <i>Penicillium verruculosum</i> endo- $\beta$ -1,4-glucanase                                                | Constraint network analysis reduced screening effort to 40% with up to 2-fold improved thermostable variants                                                                                                                    | [22]        |



## 2. Plasmid construction and mutagenesis of EGLII

**pBSYA1S1Z::EGLII** : pBSYA1S1Z is a shuttle vector (pUC Ori and ARS) with zeocin resistance as a selection marker. EGLII represents the codon-optimized synthetic endo- $\beta$ -Glucanase gene from *Penicillium verruculosum* (UniProtKB: A0A1U7Q1U3) cloned between *XhoI* and *NotI* restriction sites. The gene is expressed with the GAP promoter ( $P_{GAP}$ ) and secreted into the supernatant by the  $\alpha$ -signal peptide (alpha SP).

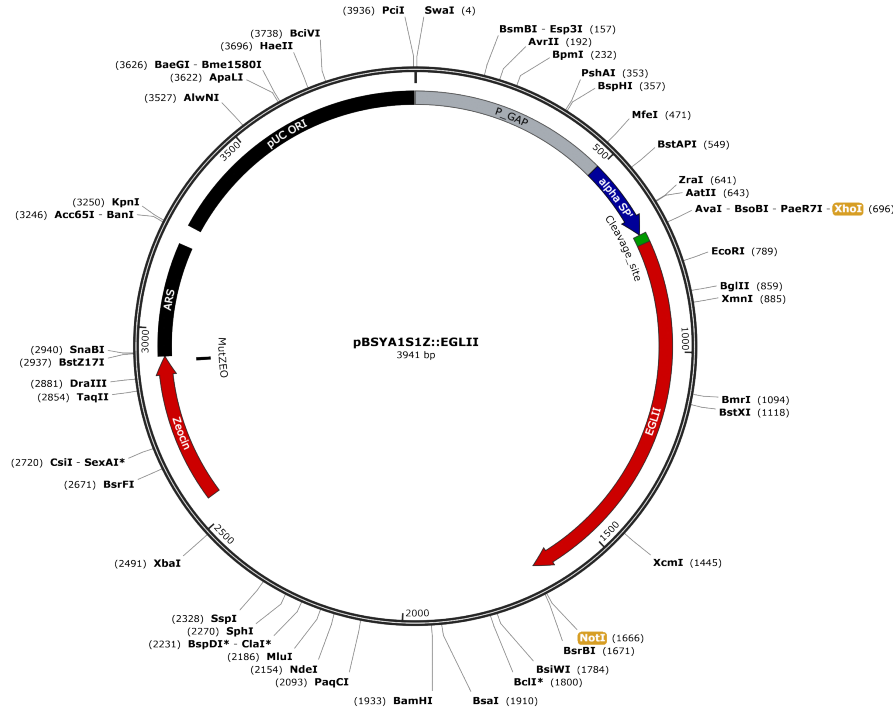

Figure 1: Representation of plasmid construct of EGLII

The EGLII gene was codon optimized for *Pichia pastoris*.

CTCGAGAAGAGAGAGGCCGAAGCTGCTAACTCTAAAGAGGTTAAGAAGAGAGCTTCCTCCTTCGA  
ATGGTTCGGTTCTAACGAATCTGGTGCTGAATTCGGTTCGGTAACATTCCAGGTGTTGAGGGTAC  
TGACTACACTTTCCCAAACACTACTGCTATCCAGATCTTGATCGACGCTGGTATGAACATCTTCAGA  
GTTCCATTCTTGATGGAAGAATGATCCCAACTGAGATGACTGGTTCCTTGACACTGCTTACTTCG  
AAGGTTACTCCGAGGTTTTGAACACTACATCACTGGTAAGGGTGCTCACGCTGTTGTTGATCCACACA  
ACTTCGGTAGATATTACGGTACTCCAATCTCCTCCACTTCCGACTTCCAACTTTCTGGTCTACTTTG  
GCTTCCCAGTTCAAGTCCAACGACTTGGTTATCTTCGACACTAACAACGAGTACCACGACATGGAC  
GAGTCCGTTGTTGTTGCTTTGAACCAGGCTGCTATCGACGGTATTAGAGATGCTGGTGCTACTACTC  
AGTACATCTTCGTTGAAGGTAACGCTTACTCCGGTGCTTGGACTTGGACTACTTACAACACTGCTAT  
GGTAACTTGACTGACCCATCCGACTTGATCGTTTACGAGATGCACCAATACTTGGACTCCGACGG  
TTCTGGTACTTCCGACCAATGTGTTTCTTCCACTGTTGGTCAAGAGAGAGTTGTTGACGCTACTACT  
TGGTTGCAGTCCAACGGAAAGTTGGGTATCTTGGGTGAATTTGCTGGTGGTGCTAACTCCGTTTGTG  
AAGAGGCTGTTGAGGGAATGTTGGATTACTTGGCTGAGAAGTCCGACGTTTGGTTGGGTGCTTCTT  
GGTGGTCTGCTGGTCCATGGTGGCAAGATTACATCTACTCTATGGAACCAACCGGTATCGCTT  
ACGAGTCTACTTGTCCATCTTGGAGACTTACTTCTAAGCGGCCGC

## 2.1. Site-directed mutagenesis

EGLII variants predicted by EV mutation and FoldX were generated by site-directed mutagenesis (SDM) using a two-step polymerase chain reaction (PCR) method [23]. The following components were used for the SDM PCR: PCR BIO VeriFi™ Polymerase mix (containing VeriFi™ Polymerase, dNTPs, and enhancers at 1X concentration), primers (0.4 µM), template DNA (20 ng), and a thermal cycler. The PCR conditions were as follows: First step: 98 °C for 60 s (1 cycle); 98 °C for 15 s, 60 °C for 15 s and 72 °C for 150 s (4 cycles). Second step: 98 °C for 60 s (1 cycle); 98 °C for 15 s, 60 °C for 15 s and 72 °C for 150 s (25 cycles); 72 °C for 10 min (1 cycle).

After the PCR, DpnI (20 U; New England Biolabs) was added for the digestion of template DNA, and the mixture was incubated overnight at 37 °C. The DpnI digested PCR products were purified using a NucleoSpin® Extract II Purification Kit (Macherey-Nagel, Germany), transformed into *E. coli* DH5α, and plated on low-salt LB agar plates (containing tryptone 10 g L<sup>-1</sup>, NaCl 5 g L<sup>-1</sup>, yeast extract 5 g L<sup>-1</sup> and agar 15 g L<sup>-1</sup>) with 50 µg mL<sup>-1</sup> zeocin. The generated recombinant variants were confirmed by sequencing at Eurofins MWG (Ebersberg, Germany). The plasmids containing the mutations were then transformed into *P. pastoris* BG11 and plated on YPD agar plates (containing peptone 20 g L<sup>-1</sup>, D-glucose 20 g L<sup>-1</sup>, yeast extract 10 g L<sup>-1</sup> and agar 15 g L<sup>-1</sup>) with 100 µg mL<sup>-1</sup> zeocin.

### 2.1.1. Primers used for site-directed mutagenesis

Table 2: Sequences of primers or predicted EGLII variants, designed using Clone Manager 9.

| S. No. | Name    | Sequence (5' to 3')            |
|--------|---------|--------------------------------|
| 1      | D138N_F | GGTTATCTTCAACACTAACAACGAGTACC  |
| 2      | D138N_R | GGTACTCGTTGTTAGTGTGAAGATAACC   |
| 3      | E205M_F | GATCGTTTACATGATGCACCAATAC      |
| 4      | E205M_R | TTGGTGCATCATGTAAACGATCAAG      |
| 5      | D138C_F | GGTTATCTTCTGCACTAACAACGAG      |
| 6      | D138C_R | CGTTGTTAGTGCAGAAGATAACCAAG     |
| 7      | E20M_F  | TCGGTTCTAACATGTCTGGTGCTG       |
| 8      | E20M_R  | CAGCACCAGACATGTTAGAACCG        |
| 9      | D138V_F | GGTTATCTTCGTGACTAACAACGAG      |
| 10     | D138V_R | CTCGTTGTTAGTCACGAAGATAACC      |
| 11     | D138L_F | GGTTATCTTCCTGACTAACAACGAGTACC  |
| 12     | D138L_R | CTCGTTGTTAGTCAGGAAGATAACC      |
| 13     | E205C_F | ATCGTTTACTGTATGCACCAATACTTGGAC |
| 14     | E205C_R | TTGGTGCATACAGTAAACGATCAAG      |
| 15     | E205Q_F | TGATCGTTTACCAGATGCACCAATAC     |
| 16     | E205Q_R | AGTATTGGTGCATCTGGTAAACG        |
| 17     | E205L_F | GATCGTTTACTTTGATGCACCAATAC     |
| 18     | E205L_R | TTGGTGCATCAAGTAAACGATCAAG      |
| 19     | S280M_F | GTTGGGTGCTATGTGGTGGTCTG        |
| 20     | S280M_R | AGACCACCACATAGCACCCAACC        |
| 21     | S280L_F | GTTGGGTGCTTTGTGGTGGTCTG        |
| 22     | S280L_R | GACCACCACAAAGCACCCAACC         |
| 23     | D138S_F | GGTTATCTTCAGCACTAACAACGAG      |
| 24     | D138S_R | CTCGTTGTTAGTGGAGAAGATAACC      |
| 25     | D138A_F | TGGTTATCTTCGCCACTAACAACG       |
| 26     | D138A_R | CTCGTTGTTAGTGGCGAAGATAACC      |
| 27     | E20L_F  | TCGGTTCTAACTTGTCTGGTGCTG       |
| 28     | E20L_R  | TCAGCACCAGACAAGTTAGAACCG       |
| 29     | S114D_F | CCAATCTCCGACACTTCCGACTTC       |

|    |         |                                        |
|----|---------|----------------------------------------|
| 30 | S114D_R | AGTCGGAAGT <b>G</b> TCGGAGATTGG        |
| 31 | E175M_F | CATCTTCGTTATGGGTAACGCTTACTC            |
| 32 | E175M_R | TAAGCGTTACCCATAACGAAGATGTACTG          |
| 33 | G181R_F | CGCTTACTCCAGAGCTTGGACTTG               |
| 34 | G181R_R | TCCAAGTCCAAGCT <b>C</b> TGGAGTAAG      |
| 35 | D138T_F | GGTTATCTTCACTACTAACAACGAGTACC          |
| 36 | D138T_R | GGTACTCGTTGTTAGT <b>A</b> GTGAAGATAACC |
| 37 | E205A_F | GATCGTTTAC <b>G</b> CTATGCACCAATAC     |
| 38 | E205A_R | ATTGGTGCAT <b>A</b> GCGTAAACGATCAAG    |
| 39 | E20I_F  | TCGGTTCTAACATCTCTGGTGCTG               |
| 40 | E20I_R  | CAGCACCAGAGATGTTAGAACCG                |
| 41 | P111I_F | TACGGTACTATCATCTCCTCCAC                |
| 42 | P111I_R | GTGGAGGAGATGATAGTACCG                  |
| 43 | T236A_F | TTGACGCTACT <b>G</b> CTTGGTTGC         |
| 44 | T236A_R | CAACCAAGCAGTAGCGTCAAC                  |
| 45 | Q289A_F | CCATGGTGGGCTGATTACATCTAC               |
| 46 | Q289A_R | ATGTAATC <b>A</b> GCCCACCATGGAC        |
| 47 | P111V_F | TTACGGTACT <b>G</b> TTATCTCCTCCAC      |
| 48 | P111V_R | GAAGTGGAGGAGATA <b>A</b> ACAGTACCG     |
| 49 | T110N_F | GATATTACGGTAACCCAATCTCCTCC             |
| 50 | T110N_R | AGGAGATTGGG <b>T</b> TACCGTAATATCTACCG |
| 51 | E81A_F  | CTGCTTACTT <b>C</b> GCAGGTTACTC        |
| 52 | E81A_R  | CGGAGTAACCT <b>G</b> CGAAGTAAG         |
| 53 | D164G_F | GTATTAGAG <b>G</b> TGCTGGTGCTAC        |
| 54 | D164G_R | AGCACCAGCACCTCTAATACC                  |
| 55 | V150L_F | GACGAGTCCT <b>T</b> GGTTGTTGCTTTG      |
| 56 | V150L_R | CAAAGCAACAACCAAGGACTCG                 |
| 57 | Y188V_F | GGACTACT <b>G</b> TCAACACTGCTATG       |
| 58 | Y188V_R | CATAGCAGTGTT <b>G</b> ACAGTAGTCC       |
| 59 | Q239K_F | CTTGGTTGAAGTCCAACGGAAAG                |
| 60 | Q239K_R | TCCGTTGGACT <b>T</b> CAACCAAGTAG       |
| 61 | L201K_F | CCCATCCGACA <b>A</b> GATCGTTTAC        |
| 62 | L201K_R | CGTAAACGAT <b>C</b> TTGTCGGATGG        |
| 63 | S123T_F | CTTTCTGGACTACTTTGGCTTC                 |
| 64 | S123T_R | GAAGCCAAAGT <b>A</b> GTCCAGAAAG        |
| 65 | A153D_F | CCGTTGTTGTT <b>G</b> ACTTGAACCAG       |
| 66 | A153D_R | CCTGGTTCAAG <b>T</b> CAACAACAACG       |
| 67 | P111I_F | TACGGTACTATCATCTCCTCCAC                |
| 68 | P111I_R | AGTGGAGGAGATGATAGTACCG                 |
| 69 | D164A_F | GTATTAGAG <b>C</b> TGCTGGTGCTAC        |
| 70 | D164A_R | AGCACCAGCAGCTCTAATACC                  |
| 71 | A178S_F | GGTAACTCCTACTCCGGTGCTTG                |
| 72 | A178S_R | ACCGGAGTAG <b>G</b> AGTTACCTTC         |
| 73 | S180T_F | AACGCTTAC <b>A</b> CTGGTGCTTGG         |
| 74 | S180T_R | AAGCACCAG <b>T</b> GTAAAGCGTTACC       |
| 75 | V226I_F | CTTCCACTATCGGTCAAGAGAG                 |
| 76 | V226I_R | CTCTTGACCG <b>A</b> TAGTGGAAGAAAC      |

|    |         |                          |
|----|---------|--------------------------|
| 77 | T236Q_F | GACGCTACTCAATGGTTGCAGTC  |
| 78 | T236Q_R | CTGCAACCATTGAGTAGCGTCAAC |
| 79 | N299S_F | AACCACCATCTGGTATCGCTTACG |
| 80 | N299S_R | AGCGATACCAGATGGTGGTTCC   |

---

### 3. EVmutation: A Case Study on *Bacillus subtilis* Lipase A (BSLA)

To evaluate the broader applicability of EVmutation, the method was applied to *Bacillus subtilis* Lipase A, a mesophilic serine hydrolase ( $T_m$  - 49.5 °C). The top 20 variants ranked by EVmutation (based on  $\Delta E$ ) were selected for experimental validation and these variants were assessed for thermal resistance by subjecting to thermal stress at 50 °C for 30 minutes.

#### 3.1. Prediction of BSLA variants

A multiple sequence alignment (MSA) was generated by performing a jackmmer search (HMMER 3.3.2)[24] against the UniProt Reference Clusters (UniRef) database UniRef100 [25, 26]. The search was initialized with the BSLA sequence using a bit score of half the sequence length. The MSA was then post-processed following the procedure outlined by Hopf et al.[27], removing sequences with more than 50 % gaps and positions with gaps in over 30 % of the sequences. Local biases and coupling terms were inferred using plmc (release 16 May 2018, available at <https://github.com/debbiemarkslab/plmc>) with regularization parameters  $lh = 0.01$  and  $le = 0.2$  ( $N = 1$ ), where  $N = 170$  is the number of effective sites in the alignment.  $\Delta E$  was then calculated for single-substituted variants. A table of the top 20 ranked single variants is given below and from the BSLA predicted variants, we can also observe that the variants are quite diverse similar to EGLII.

Table 3: Top 20 BSLA variants predicted by EVmutation.

| Rank | Variant | $\Delta E$ |
|------|---------|------------|
| 1    | T47N    | 1.78       |
| 2    | M137A   | 1.64       |
| 3    | M137S   | 1.57       |
| 4    | G111S   | 1.45       |
| 5    | F17Y    | 1.32       |
| 6    | Y139S   | 1.30       |
| 7    | R147K   | 1.28       |
| 8    | Y161S   | 1.21       |
| 9    | M137T   | 1.19       |
| 10   | G111N   | 1.15       |
| 11   | S162N   | 0.94       |
| 12   | H152S   | 0.93       |
| 13   | W42L    | 0.92       |
| 14   | T109V   | 0.89       |
| 15   | M134E   | 0.88       |
| 16   | R147N   | 0.79       |
| 17   | M134Q   | 0.78       |
| 18   | V149I   | 0.75       |
| 19   | M137L   | 0.74       |
| 20   | W42S    | 0.73       |

#### 3.2. Plasmid Construction and Mutagenesis

The codon-optimized synthetic BSLA gene (UniProtKB: P37957) was cloned into the pET-22b(+) vector using *NcoI* and *XhoI* restriction sites (see codon optimized sequence of BSLA). The gene was expressed under the control of the T7 promoter and targeted to the periplasm using the signal peptide encoded by the vector. This plasmid (pET-22b(+)-bsla-his) (Figure 2) served as the template for site-directed mutagenesis (SDM), performed using the PCR BIO VeriFi™ polymerase mix. The following components were used for the SDM PCR: PCR BIO VeriFi™ Polymerase mix (containing VeriFi™ Polymerase, dNTPs, and enhancers at 1X concentration), primers (0.4  $\mu$ M), template DNA (20 ng), and a thermal cycler. The PCR conditions were as follows: First step: 98 °C for 30 s (1 cycle); 98 °C for 10 s, 50 °C for 30 s, and 72 °C for 180 s (2 cycles). Second step: 98 °C for 30 s (1 cycle); 98 °C for 10 s, 50 °C for 30 s, and 72 °C for 180 s (25 cycles); 72 °C for 10 min (1 cycle). Primers for each substitution is listed in Table 4.



### 3.2.1. Primers used for site-directed mutagenesis

Table 4: Sequences of primers for predicted BSLA variants, designed using Clone Manager 9.

| Primer Name | Sequence                                  |
|-------------|-------------------------------------------|
| F17Y_F      | GGCGCTTCGT <b>T</b> ACAAC <b>T</b> TTGCAG |
| F17Y_R      | CTGCAAAGTT <b>G</b> TACGAAGCGCC           |
| W42S_F      | GTTGACTTCC <b>A</b> GCGATAAGACCG          |
| W42S_R      | CGGTCTTAT <b>C</b> GCTGAAGTCAAC           |
| W42L_F      | GTTGACTTC <b>C</b> TGGATAAGACCG           |
| W42L_R      | CGGTCTTAT <b>C</b> CAGGAAGTCAAC           |
| T47N_F      | AAGACCGGCA <b>A</b> CAACTATAAC            |
| T47N_R      | GTTATAGT <b>T</b> GTTGCCGGTCTT            |
| T109V_F     | AACCGCCT <b>T</b> GTGACCGGCAAG            |
| T109V_R     | CTTGCCGGT <b>C</b> ACAAGGCGGTT            |
| G111S_F     | CTTACCACC <b>A</b> GCAAGGCGCTG            |
| G111S_R     | CAGCGCCT <b>T</b> GCTGGTGGTAAG            |
| G111N_F     | CTTACCAC <b>A</b> CAAGGCGCTG              |
| G111N_R     | CAGCGCCT <b>T</b> GTTGGTGGTAAG            |
| M134E_F     | CCTCTGCCGAT <b>G</b> AAATTGTGATG          |
| M134E_R     | CATCACAAT <b>T</b> TTTCATCGGCAGAGG        |
| M134Q_F     | CTCTGCCGAT <b>C</b> AGATTGTGATG           |
| M134Q_R     | CATCACAAT <b>C</b> TGATCGGCAGAG           |
| M137A_F     | ATGATTGT <b>G</b> GCGAACTACCTC            |
| M137A_R     | GAGGTAGT <b>T</b> CGCCACAATCAT            |
| M137S_F     | ATGATTGT <b>G</b> AGCAACTACCTC            |
| M137S_R     | GAGGTAGT <b>T</b> GCTCACAATCAT            |
| M137T_F     | ATGATTGT <b>G</b> ACCAACTACCTC            |
| M137T_R     | GAGGTAGT <b>T</b> GGTCAACAATCAT           |
| M137L_F     | ATGATTGT <b>G</b> CTGAACCTACCTC           |
| M137L_R     | GAGGTAGT <b>T</b> CAGCACAATCAT            |
| Y139S_F     | GTGATGA <b>A</b> CAGCCTCTCTCGC            |
| Y139S_R     | GCGAGAGAG <b>G</b> CTGTTTCATCAC           |
| R147K_F     | GACGGTGCGA <b>A</b> AAATGTGCAG            |
| R147K_R     | CTGCACAT <b>T</b> TTTCGCACCGTC            |
| R147N_F     | GACGGTGCGA <b>A</b> CAATGTGCAG            |
| R147N_R     | CTGCACAT <b>T</b> GTTTCGCACCGTC           |
| V149I_F     | GCGCGTAAT <b>A</b> TTTCAGATTCATGG         |
| V149I_R     | CCATGAATCT <b>G</b> AATATTACGCGC          |
| H152S_F     | GTGCAGAT <b>T</b> TCCGGTGTGGTC            |
| H152S_R     | GACCAACAC <b>C</b> GGAATCTGCAC            |
| Y161S_F     | GGCTTGCT <b>G</b> AGCTCCAGCCAA            |
| Y161S_R     | TTGGCTGG <b>A</b> GCTCAGCAAGCC            |
| S162N_F     | CTTGCTGT <b>A</b> CAACAGCCAAGTT           |
| S162N_R     | AACTTGGCT <b>T</b> GTTGTACAGCAAG          |

### 3.3. Cloning and expression of BSLA variants

*Escherichia coli* DH5 $\alpha$  (Agilent Technologies, Santa Clara, USA) was used as the cloning host, and *Escherichia coli* BL21 DE3 Gold (Agilent Technologies, Santa Clara, USA) was used as the expression host. BSLA variants were cultured in 96-well F-bottom polystyrene microtiter plates (MTPs) (Greiner, Frickenhausen, Germany) and expressed in 96-well V-bottom polystyrene microtiter plates (MTPs) (Corning Inc., 2 Alfred Rd, Kennebunk, ME 04043, United States) using an MTP shaker (Infors HT Multitron, Bottmingen, Switzerland). Luria-Bertani (LB) media (0.5 % w/v yeast extract, 1 % w/v tryptone, and 1 % w/v NaCl) supplemented with 100  $\mu\text{g mL}^{-1}$  ampicillin was used for cell culture. Modified Auto-induction media (2.4 % w/v yeast extract, 1.2 % w/v tryptone, and 0.5 % w/v glycerol, 0.05 % w/v glucose, 0.2 % w/v lactose, 9 % v/v KPi Buffer (pH 7, 1M)) supplemented with 100  $\mu\text{g mL}^{-1}$  ampicillin was used for protein expression. Colonies picked from LB agar plates were used to inoculate preculture (150  $\mu\text{L}$  per well, 37  $^{\circ}\text{C}$ , 900 rpm, 16 hours, and 70 % humidity). The main ex-

pression culture (150  $\mu$ L per well, 30  $^{\circ}$ C, 900 rpm, 16 hours, and 70 % humidity) was inoculated with a volume of 5  $\mu$ L from the preculture. The cell pellet was separated from the cell culture by centrifugation (Eppendorf 5810R; 4  $^{\circ}$ C, 3220 x g, 20 minutes), and 150  $\mu$ L of lysis buffer (0.02 % v/v DNAase, 1 % v/v  $MgCl_2$  (0.5 M), and 0.05 % w/v lysozyme in 50 mM Triethanolamine Buffer (TEA buffer, pH 7.4)) was added per well. The MTP containing cell pellet and lysis buffer was incubated (37  $^{\circ}$ C, 1 hour, 900 rpm, and 70 % humidity) using an MTP shaker (Infors HT Multitron, Bottmingen, Switzerland). The cell debris was separated by centrifugation (Eppendorf 5810R; 4  $^{\circ}$ C, 3220 x g, 20 minutes) and lipase containing supernatant was used for further analysis.

### 3.4. Enzymatic activity of BSLA variants after thermal stress

p-Nitrophenyl butyrate (pNPB) assay in MTP format was used to assess the hydrolytic activity of BSLA [28]. The assay is based on the hydrolysis of p-Nitrophenyl butyrate into p-nitrophenolate which is detected at 410nm. The lipase containing supernatant was diluted 10-fold in TEA buffer (50 mM) and then incubated at high temperature (50  $^{\circ}$ C) without the substrate. To evaluate the activity of BSLA variants after thermal stress, the temperature of 50  $^{\circ}$ C for 30 minutes was chosen as it reduced the wild type enzyme activity to approximately 30 %. Enzymatic activity was measured before ( $T_0$ ) and after ( $T_{30}$ ) thermal stress by adding 100  $\mu$ L of freshly prepared substrate solution (TEA buffer containing 0.5 mM pNPB and 10 % v/v acetonitrile) to each well and monitoring the release of p-nitrophenolate at 410 nm using CLARIOstar Plus microplate reader from BMG Labtech (Ortenberg, Germany). Activity was quantified at room temperature by the slope of absorbance over 4 minutes (13 kinetic cycles, 5 flashes/well). Each variant was analyzed in at least three biological replicates.

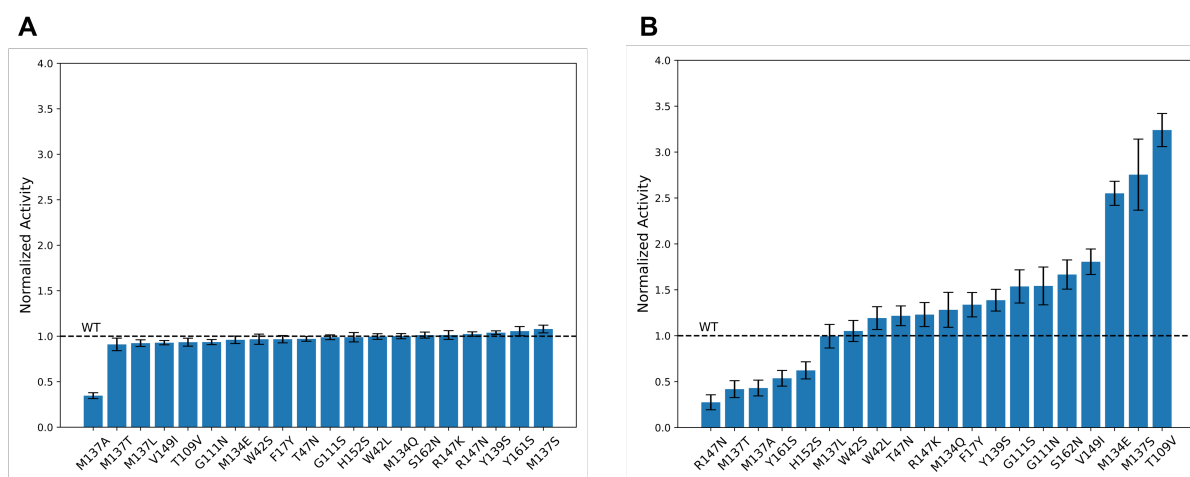

Figure 3: Normalized activity of BSLA variants relative to wild type before (A) and after thermal stress (B)

The results showed that, under non-stress conditions, all variants except M137A exhibited similar activity to the WT (Figure 3A). After thermal stress, 13 out of 20 variants displayed increased residual activity, yielding a hit rate of 65 % (Figure 3B). Notably, three variants exhibited more than 2.5-fold improvement, with T109V showing the highest (3.2-fold). These results demonstrate that EVmutation performs comparably—or even better—for the enzyme with lower or moderate thermostability, underscoring the method's generalizability to other enzyme classes.

### 3.5. Half-life of BSLA variants

The half-lives were also determined for the predicted 20 variants. The diluted supernatant was incubated at 50  $^{\circ}$ C without the substrate for different time intervals ranging from 0 to 60 minutes. Subsequently, pNPB assay was used to assess the hydrolytic activity of incubated and non-incubated variants as described above. Residual activity was plotted against time, and half-lives were calculated via linear interpolation (Figure 4). All the measurements were conducted with at least three biological replicates. Of the 20 tested variants, 16 showed improved half-lives compared to WT, with 7 variants exhibiting more than a two-fold increase in stability. The most thermostable variant, T109V, demonstrated a 5.4-fold improvement in half-life over WT (Table 5, Figure 4).

These findings collectively demonstrate that EVmutation can effectively enrich thermally resistant and active variants across different enzyme classes, provided sufficient sequences are available. The success observed with BSLA further supports the method's potential for widespread application in protein engineering workflows.



Table 5: Estimated half-lives of BSLA variants at 50 °C.

| Variant   | Half-Life (minutes) |
|-----------|---------------------|
| R147N     | 3.19                |
| H152S     | 6.88                |
| M137T     | 7.25                |
| Y161S     | 8.03                |
| <b>WT</b> | <b>12.63</b>        |
| M137L     | 13.19               |
| R147K     | 15.48               |
| W42S      | 16.02               |
| W42L      | 16.56               |
| Y139S     | 16.93               |
| T47N      | 18.65               |
| M134Q     | 19.73               |
| F17Y      | 21.95               |
| G111S     | 25.22               |
| S162N     | 26.53               |
| G111N     | 28.18               |
| V149I     | 31.96               |
| M134E     | 36.88               |
| M137S     | 38.01               |
| T109V     | 68.09               |

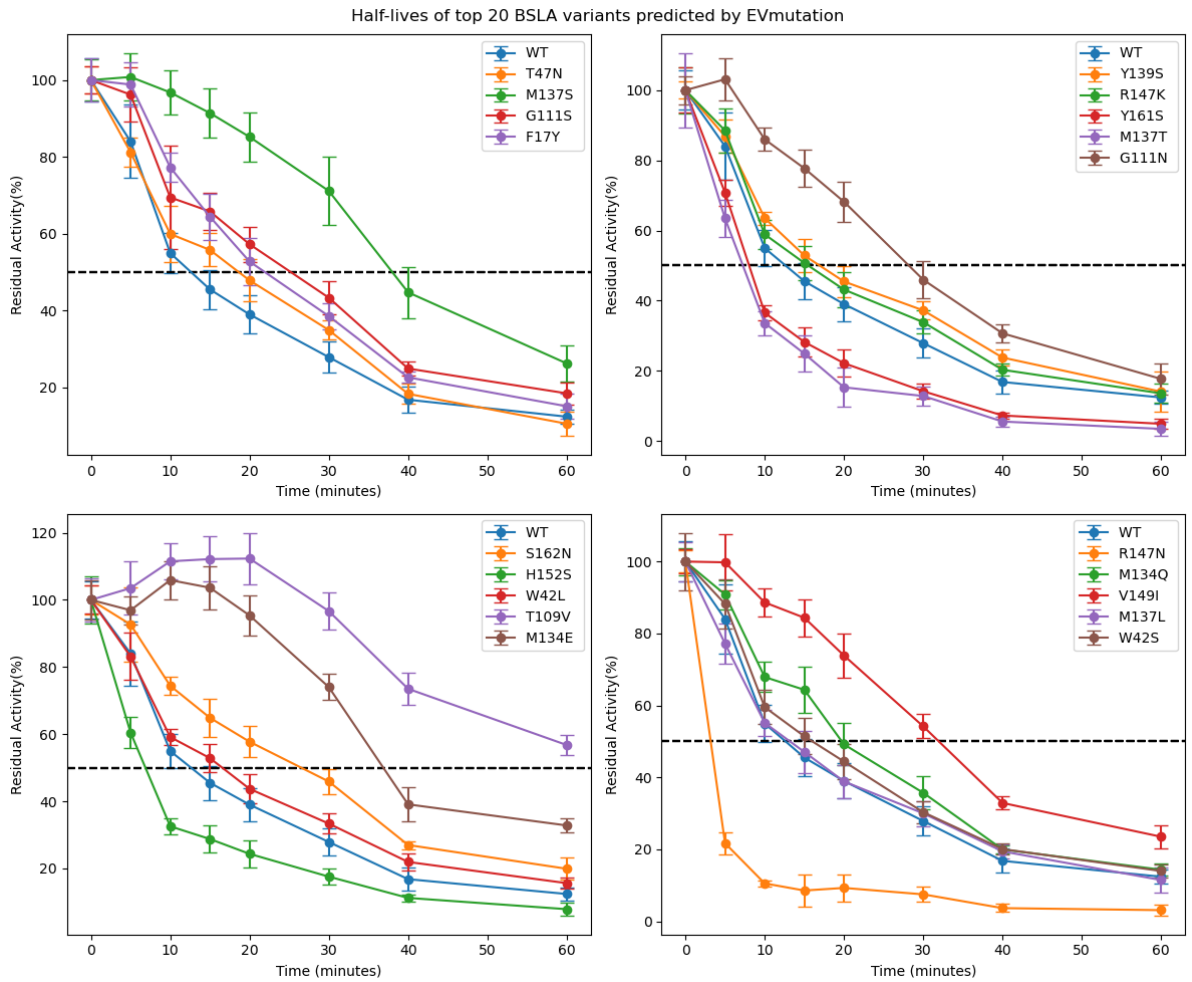

Figure 4: Half-lives of the predicted BSLA variants

#### 4. Correlation between predicted energy ( $\Delta\Delta G$ and $\Delta E$ ) with $T_m$ and normalized activity

To assess the predictive performance of FoldX and EVmutation in identifying functionally improved variants, we analyzed the relationship between computational/predictive energy scores—folding free energy differences ( $\Delta\Delta G$ ) from FoldX and statistical energy differences ( $\Delta E$ ) from EVmutation—and two key experimental parameters: melting temperature ( $T_m$ ) and enzymatic activity normalized to wild-type EGLII after thermal stress at 75 °C.

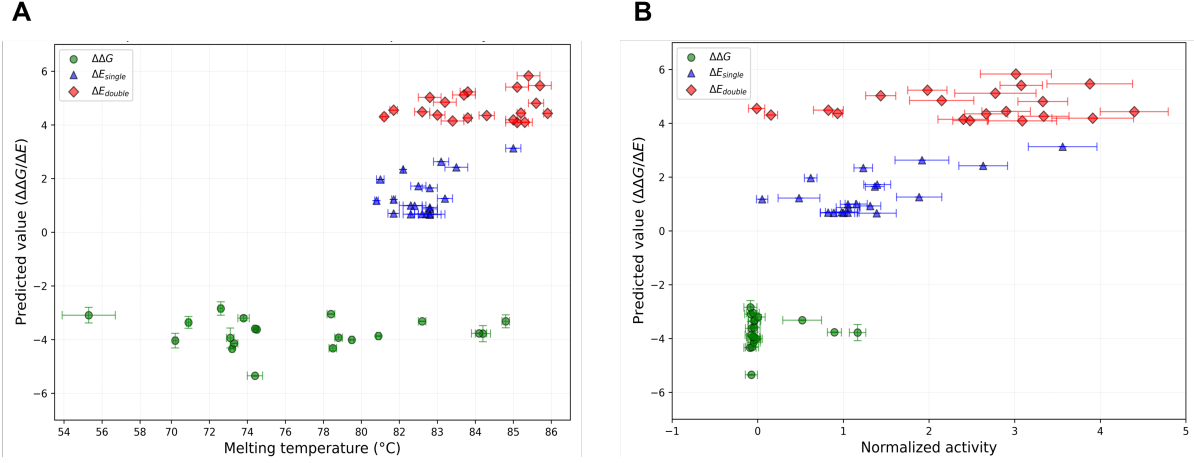

Figure 5: Correlation of predictive energy values from FoldX and EVmutation with experimentally determined  $T_m$  (A) and normalized enzymatic activity after thermal stress at 75 °C (B)

Scatter plots were generated to visualize the distribution of predicted energy values against experimental measurements, and both Pearson and Spearman correlation coefficients were computed to quantify linear and rank-based associations, respectively. For single-substituted variants, the  $\Delta E$  values from EVmutation exhibited moderate correlations with normalized activity (Pearson: 0.67; Spearman: 0.49) and  $T_m$  (Pearson: 0.41; Spearman: 0.19), outperforming FoldX ( $\Delta\Delta G$ ), which showed weak or negligible correlations with either metric (see Table). In contrast, for double-substituted variants, EVmutation correlations were substantially weaker (see Table,  $\Delta E_{\text{double}}$ ). Although  $\Delta E$  outperforms  $\Delta\Delta G$  in terms of numerical correlation with experimental data, the differences in correlation strength are not statistically significant. This suggests that, on a purely numerical basis,  $\Delta E$  is not substantially more predictive than  $\Delta\Delta G$  when assessed using standard correlation metrics. Therefore, no statistically meaningful correlation could be established between the predicted energy scores and the experimental measurements based solely on Pearson or Spearman coefficients.

Table 6: Pearson and Spearman correlation coefficients between predicted energy values ( $\Delta\Delta G$ ,  $\Delta E_{\text{single}}$  and  $\Delta E_{\text{double}}$ ) and normalized activity after thermal stress and melting temperature ( $T_m$ ).

| Predictor                                 | Normalized Activity |           | $T_m$     |           |
|-------------------------------------------|---------------------|-----------|-----------|-----------|
|                                           | Pearson             | Spearman  | Pearson   | Spearman  |
| FoldX ( $\Delta\Delta G$ )                | 0.056941            | 0.123824  | -0.115848 | -0.006772 |
| EVmutation ( $\Delta E_{\text{single}}$ ) | 0.674166            | 0.486080  | 0.405811  | 0.186272  |
| EVmutation ( $\Delta E_{\text{double}}$ ) | 0.137420            | -0.022556 | 0.202472  | 0.118134  |

However, a qualitative inspection of the scatter plots reveals a consistent pattern: variants predicted by EVmutation tend to cluster in regions associated with higher thermal stability and enhanced activity. In contrast, FoldX predictions are predominantly concentrated in areas of lower activity and moderate stability. These observations suggest that although  $\Delta E$  may not dramatically surpass  $\Delta\Delta G$  in quantitative correlation values, EVmutation is more effective in enriching for beneficial variants. This finding aligns with our experimental results and supports the practical utility of EVmutation as a tool for guiding protein engineering.

## 5. Comparative analysis of wild-type EGLII and top-performing single- and double-substituted variant

The EVmutation-predicted variants, Q289G and S180T/Q289G outperformed wild-type EGLII, retaining 3.6- and 4.4-fold higher activity after incubation at 75 °C. Their half-lives ( $104 \pm 7$  and  $121 \pm 15$  minutes) and melting temperatures ( $85^\circ\text{C}$  and  $85.9^\circ\text{C}$ ) exceeded wild type ( $40 \pm 2$  minutes,  $82.1^\circ\text{C}$ ), with S180T/Q289G showing the highest improvement.

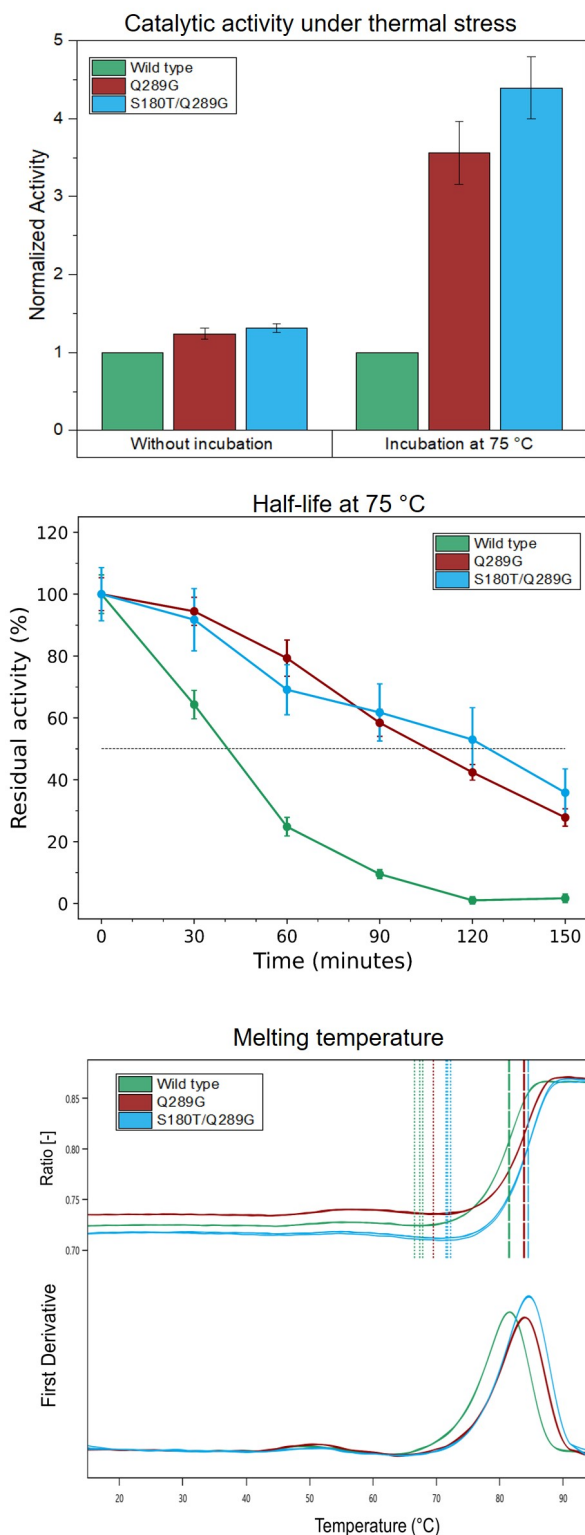

Figure 6: Thermal performance comparison of wild-type EGLII with the top-performing single-substitution variant Q289G and double-substitution variant S180T/Q289G.

## 6. Oligomerization analysis of wild-type EGLII and top-performing single- and double-substituted variant

To evaluate the oligomeric state and potential aggregation of the enzyme, the wild-type EGLII, along with the two best-performing variants—Q289G and the double mutant S180T/Q289G—were purified using anion exchange chromatography. For protein expression, *Pichia pastoris* cultures were grown in 100 mL YPD medium supplemented with  $100\text{ }\mu\text{g mL}^{-1}$  Zeocin. The EGLII wild-type and variants were cultured for 96 hours in Erlenmeyer flasks ( $25\text{ }^{\circ}\text{C}$  and 180 rpm). Following cultivation, the culture supernatant was clarified by centrifugation at  $10,000\times g$  for 30 minutes at  $4\text{ }^{\circ}\text{C}$  (Sorvall RC 6 Plus Centrifuge, Thermo Scientific). The resulting supernatant was concentrated to a final volume of 5 mL using a centrifugal filter unit (10kDa MWCO), and the culture medium was exchanged with 20 mM Tris-Cl buffer (pH 6.5; buffer A).

Protein purification was performed using fast protein liquid chromatography (FPLC) on an ÄKTApriime Plus system (GE Healthcare). The concentrated sample was loaded onto a 5 mL HiTrap DEAE FF anion exchange column pre-equilibrated with buffer A. The protein was eluted using a linear gradient of 15 % to 50 % Buffer B (20 mM Tris-Cl, pH 6.5, containing 1 M NaCl). Fractions corresponding to the expected size of 35 kDa were pooled and analyzed by SDS-PAGE under both reducing and non-reducing conditions (Figure??). Protein concentration of the purified enzyme variants was normalized by measuring the total protein concentration utilizing A280nm (NanoDrop™ 1000 spectrophotometer by Thermo Scientific™, Bremen, Germany), using the theoretical extinction coefficients determined based on the amino acid composition with ProtParam on the ExPASy server ( $81945\text{ L M}^{-1}\text{ cm}^{-1}$ ).

### 6.1. SDS PAGE analysis

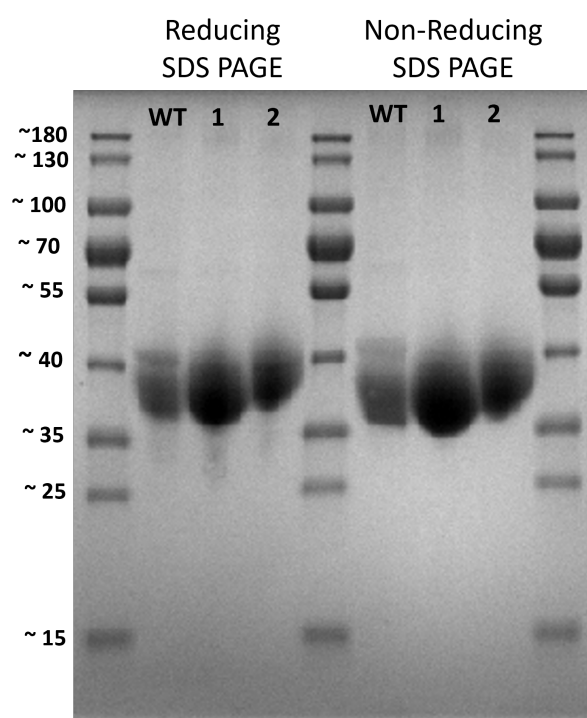

Figure 7: SDS-PAGE analysis of purified EGLII WT(WT), Q289G (1) and S180T/Q289G (2) under reducing and non-reducing conditions

SDS-PAGE analysis revealed that all three variants migrated as single bands at approximately 35 kDa under both reducing and non-reducing conditions. This indicates that the enzyme variants lack intermolecular disulfide-linked oligomers and may be predominantly monomeric in nature.

### 6.2. Native-PAGE analysis

To further confirm the oligomeric state of EGLII and its variants, native PAGE analysis was performed. Although the bands appeared faint, we could observe prominent single bands for all variants in the native gel, further suggesting that EGLII and its variants exist predominantly in a monomeric state under native conditions.

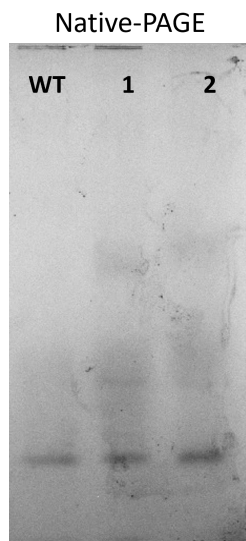

Figure 8: Native PAGE analysis of EGLII wild type (WT), Q289G (1) and S180T/Q289G (2)

### 6.3. DLS measurements

Dynamic light scattering (DLS) measurements were performed to assess the potential oligomerization and aggregation by assessing the hydrodynamic size and polydispersity of EGLII wild-type and its two best-performing variants (Q289G and S180T/Q289G). Measurements were conducted using the Wyatt DynaPro NanoStar, with data acquisition and analysis carried out using DYNAMICS 7 software. All samples were prepared at a concentration of  $0.5 \text{ mg mL}^{-1}$  in 20 mM Tris-Cl buffer (pH 6.5). Prior to measurement, each sample was filtered through  $0.22 \mu\text{m}$  filters and equilibrated at  $20^\circ\text{C}$  before measurement (except when assessing high temperature). DLS measurements were acquired using auto-attenuation mode ( $10 \times 10$ -second acquisitions) and analyzed via cumulants and regularization (CONTIN) methods. Primary interpretation was based on the regularization method, which enables higher-resolution particle size distribution analysis. Particle sizes were evaluated in three dynamic ranges: Range 1 (0.2 nm to 20 nm), Range 2 (20 nm to 200 nm), and Range 3 (200 nm to 2000 nm). Size and dispersity assessments were based regularization algorithm with % number distribution weighting, which reflects the true population of particles in solution. Each sample was analyzed in at least 8 replicates to ensure statistical reliability and reproducibility. Particles were considered monomeric if more than 95% of the number distribution fell within Range 1, consistent with the crystallographic dimensions of the EGLII monomer ( $5.5 \times 4.7 \times 3.7 \text{ nm}$ ; Figure 9). Minor peaks at higher diameters with negligible % number but higher intensity were attributed to trace aggregates or scattering artifacts, given the greater light-scattering power of larger particles.

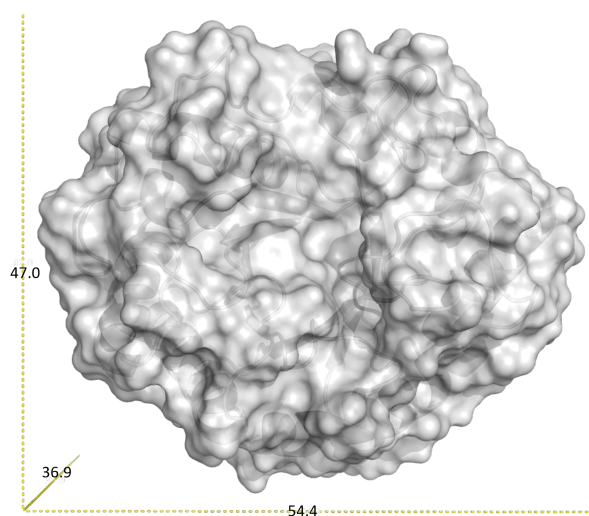

Figure 9: Dimensions of the crystallographic structure of EGLII monomer

### 6.3.1. DLS under native buffer conditions

DLS measurements revealed that all three enzyme variants—WT, Q289G, and S180T/Q289G—existed predominantly as monomeric species under native buffer conditions. More than 99% of particles by number were detected within the smallest size range (Range 1), confirming a monodisperse population. The average hydrodynamic diameters of the WT, Q289G, and S180T/Q289G variants were  $4.37 \pm 0.28$  nm,  $4.32 \pm 0.34$  nm, and  $4.88 \pm 0.41$  nm, respectively (mean  $\pm$  SEM,  $n = 15$  each) (Figure 10). These values fall within the expected range of 4 nm to 6 nm and are in excellent agreement with the crystallographic dimensions of the monomeric protein (Figure 9), supporting their monomeric state in solution. Minor peaks corresponding to larger particles were observed in the intensity distribution for some samples; however, their contribution to the overall number distribution was negligible (less than 1%), indicating trace aggregation or scattering artifacts.

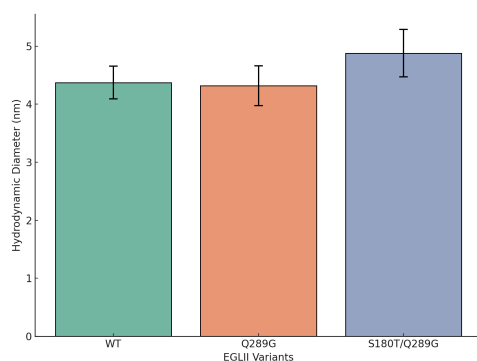

Figure 10: Estimated hydrodynamic diameters of EGLII variants under native buffer conditions (Range 1)

### 6.3.2. DLS after thermal stress

DLS measurements were performed after one hour of incubation at 75 to assess the thermal stability of the EGLII variants. The average diameters (Range 1) of the WT, Q289G, and S180T/Q289G variants increased to  $7.70 \pm 1.40$  nm,  $5.31 \pm 0.70$  nm, and  $6.50 \pm 0.72$  nm, respectively (mean  $\pm$  SEM,  $n = 8-10$ ) (Figure 11). The Q289G and S180T/Q289G variants remained within the expected monomeric size range, while the WT variant showed a marked increase in hydrodynamic diameter, suggesting thermal-induced expansion or partial aggregation. Analysis of particle count distributions showed no detectable particles in the aggregate range (Range 2) for Q289G, and only a single S180T/Q289G replicate showed a trace amount of larger species, which was negligible by number. In contrast, 2 out of 8 WT samples contained measurable populations in the aggregate size range. Furthermore, a comparison of % mass in the monomeric size range (Range 1) revealed a significant drop in the WT variant (from ~99% in buffer to 81.7 % after heating), whereas the Q289G and S180T/Q289G variants maintained higher monomeric mass percentages of 93.9 % and 94.7 %, respectively. These results indicate enhanced thermal stability of the two variants.

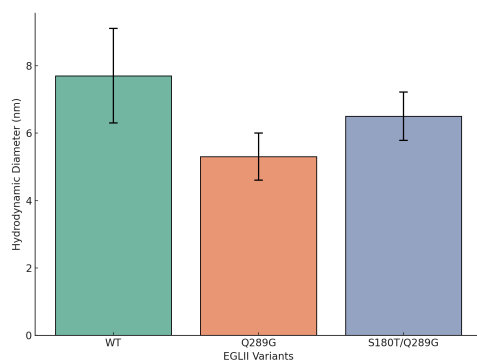

Figure 11: Estimated hydrodynamic diameters of EGLII variants after one hour incubation at 75 °C (Range 1)

### 6.3.3. DLS under high salt conditions

To evaluate salt stability, DLS measurements were conducted for EGLII variants at two salt concentration (1 M and 3 M NaCl). At both salt concentrations, all three variants maintained monomeric sizes, and no particles were detected in the aggregate size range (Range 2) in any sample. In 1 M NaCl, the average hydrodynamic diameters for WT, Q289G, and S180T/Q289G were  $4.38 \pm 0.61$  nm,  $5.75 \pm 0.39$  nm, and  $6.40 \pm 0.17$  nm, respectively

(mean  $\pm$  SEM,  $n = 8$ ). In 3 M NaCl, the diameters were  $5.07 \pm 0.44$  nm,  $5.97 \pm 0.63$  nm, and  $6.07 \pm 0.82$  nm, respectively ( $n = 8-9$ ) (Figure 12). All values fall within or slightly above the expected monomeric range based on the crystallographic dimensions (maximum extent  $\sim 5.5-6$  nm). Mass distribution in the range (Range 1) remained high for all variants at 3 M NaCl: 97.2 % (WT), 98.9 % (Q289G), and 98.3 % (S180T/Q289G). These results confirm that all EGLII variants remain monomeric even under extreme ionic strength. Both Q289G and S180T/Q289G demonstrate excellent salt stability, with Q289G showing the most consistent behavior across conditions.

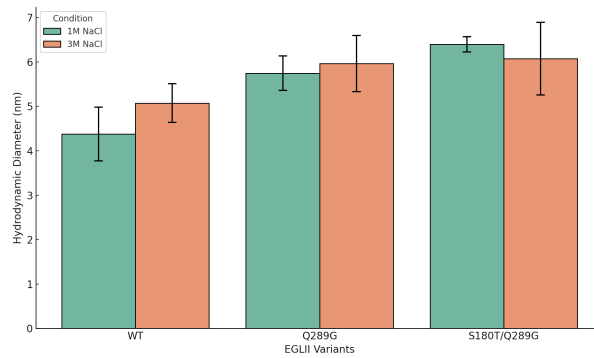

Figure 12: Estimated hydrodynamic diameters of EGLII variants in presence of high salt concentrations (Range 1)

## 7. SDS-PAGE analysis of predicted EGLII variants from FoldX and EVmutation (single and double substituted)

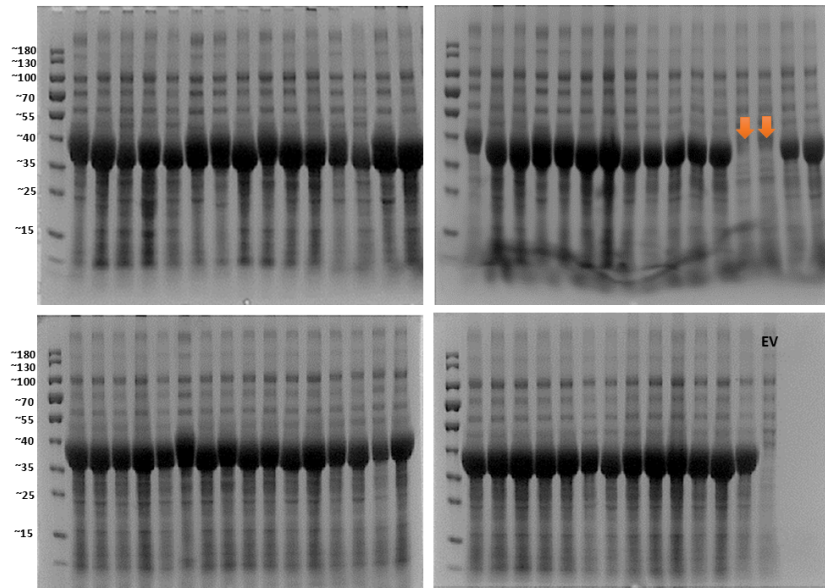

Figure 13: SDS-PAGE analysis of predicted variants from FoldX and EVmutation (single- and double-substituted)

“EV” represents the empty vector. Our protein of interest, approximately 35 kDa, is represented by a prominent band on the gel. Notably, the two variants indicated by arrows (T110N and N299S) exhibited no expression; consequently, these variants were re-transformed, and all analyses were repeated for them.

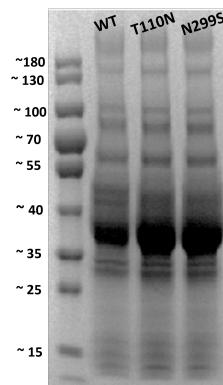

Figure 14: SDS-PAGE analysis of EGLII wild-type and variants T110N and N299S.



## 8. Half-lives of predicted EGLII variants from FoldX and EVmutation (single and double substituted)

Table 7: Half-lives of the predicted EGLII variants by FoldX and EVmutation.

The variants depicted as N/A exhibited very little initial activity (without incubation at 75 °C), making half-life determination not applicable.

| FoldX                       |                      | Evmutation                  |                      | Evmutation                  |                      |
|-----------------------------|----------------------|-----------------------------|----------------------|-----------------------------|----------------------|
| Single-substituted variants |                      | Single-substituted variants |                      | Double-substituted variants |                      |
| Variants                    | Half-Lives (minutes) | Variants                    | Half-Lives (minutes) | Variants                    | Half-Lives (minutes) |
| S280L                       | 54 ± 8               | Q289G                       | 104 ± 7              | P111I/Q289G                 | 122 ± 8              |
| S280M                       | 54 ± 2               | S180T                       | 63 ± 4               | S180T/Q289G                 | 121 ± 15             |
| <b>WT</b>                   | <b>40 ± 2</b>        | V226I                       | 60 ± 7               | P111V/Q289G                 | 118 ± 7              |
| S114D                       | 36 ± 2               | P111I                       | 54 ± 6               | E81A/Q289G                  | 86 ± 16              |
| E205Q                       | 17 ± 1               | T236A                       | 51 ± 5               | D164A/Q289G                 | 84 ± 14              |
| E20M                        | 15 ± 1               | P111V                       | 49 ± 2               | T110N/Q289G                 | 83 ± 5               |
| E20L                        | 15 ± 1               | Q239K                       | 49 ± 3               | V226I/Q289G                 | 76 ± 9               |
| D138L                       | 14 ± 1               | D164A                       | 48 ± 6               | T236Q/Q289G                 | 60 ± 3               |
| E20I                        | 14 ± 1               | T236Q                       | 48 ± 3               | Q289G/N299S                 | 59 ± 3               |
| D138A                       | N/A                  | A153D                       | 45 ± 5               | D164G/Q289G                 | 54 ± 3               |
| D138C                       | N/A                  | E81A                        | 44 ± 4               | P111I/V226I                 | 54 ± 6               |
| D138N                       | N/A                  | L201K                       | 43 ± 3               | P111I/D164A                 | 50 ± 2               |
| D138S                       | N/A                  | D164G                       | 43 ± 3               | P111V/V226I                 | 48 ± 2               |
| D138T                       | N/A                  | Q289A                       | 43 ± 7               | D164A/V226I                 | 46 ± 3               |
| D138V                       | N/A                  | V150L                       | 42 ± 4               | A178S/Q289G                 | 46 ± 4               |
| E175M                       | N/A                  | <b>WT</b>                   | <b>40 ± 2</b>        | <b>WT</b>                   | <b>40 ± 2</b>        |
| E205A                       | N/A                  | Y188V                       | 40 ± 2               | P111I/Q289A                 | 40 ± 5               |
| E205C                       | N/A                  | S123T                       | 34 ± 5               | V226I/Q289A                 | 39 ± 4               |
| E205L                       | N/A                  | T110N                       | 29 ± 2               | P111I/A178S                 | 37 ± 2               |
| E205M                       | N/A                  | A178S                       | 26 ± 4               | A178S/V226I                 | 24 ± 2               |
| G181R                       | N/A                  | N299S                       | 20 ± 2               | D164A/A178S                 | 22 ± 2               |

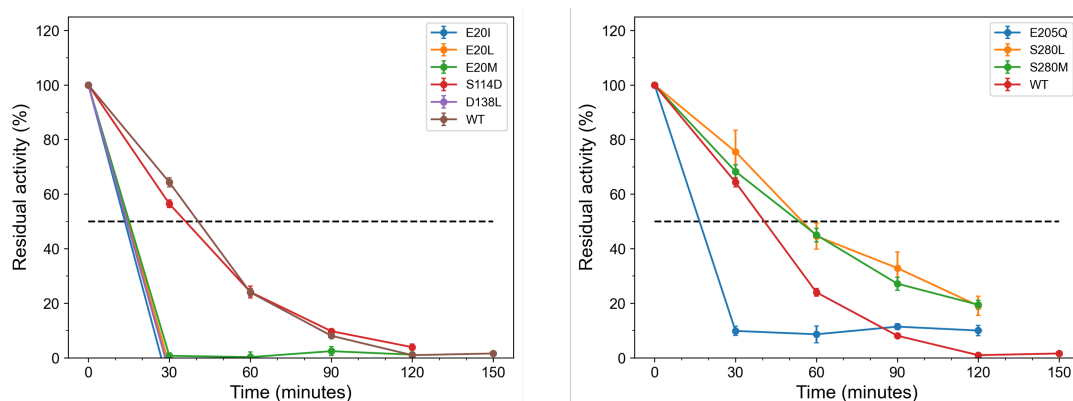

Figure 15: Half-lives of single-substituted EGLII variants predicted by FoldX.

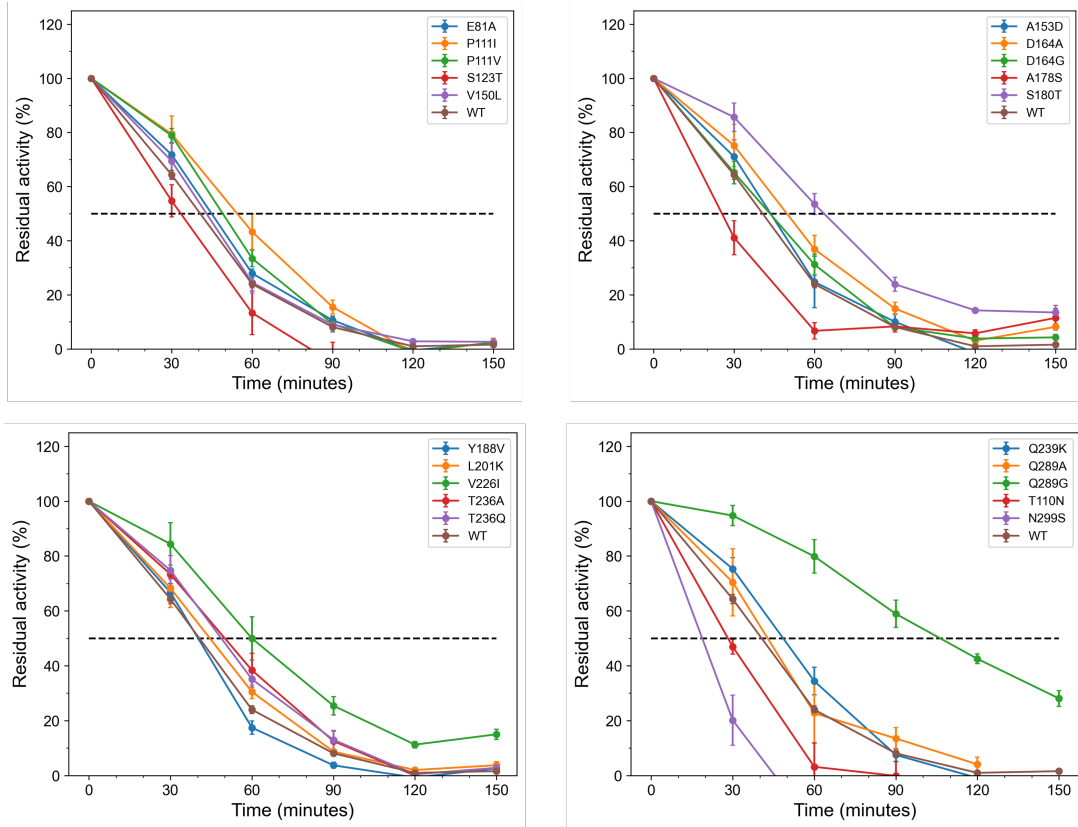

Figure 16: Half-lives of single-substituted EGLII variants predicted by EVmutation

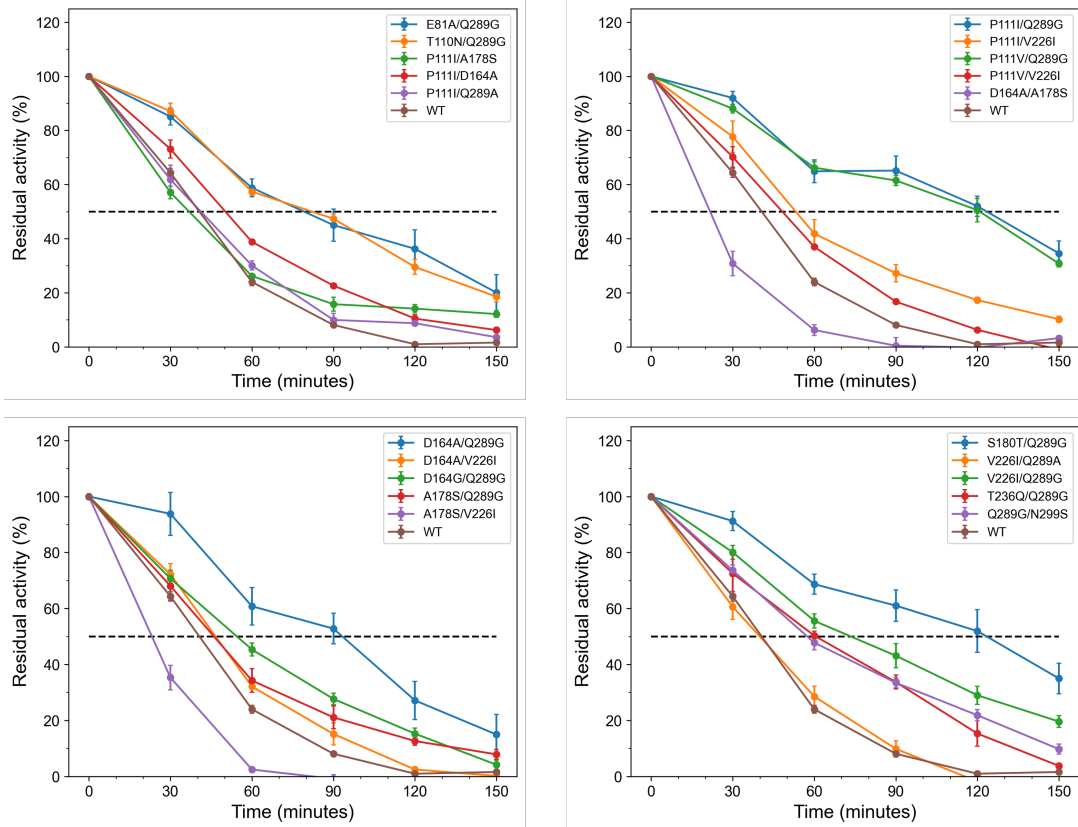

Figure 17: Half-lives of double-substituted EGLII variants predicted by EVmutation

## 9. Enzymatic activity of predicted EGLII variants without thermal stress

All predicted EGLII variants by FoldX and EVmutation were assessed by a hydrolytic assay using solubilized Azo-CM-Cellulose, as detailed in the Materials and Methods section.

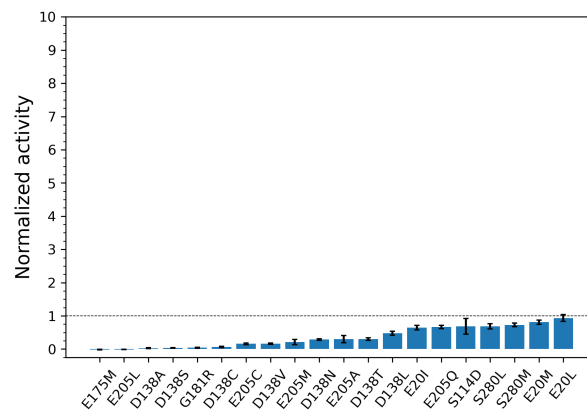

Figure 18: Normalized enzymatic activity of FoldX-predicted single-substituted variants without thermal stress.

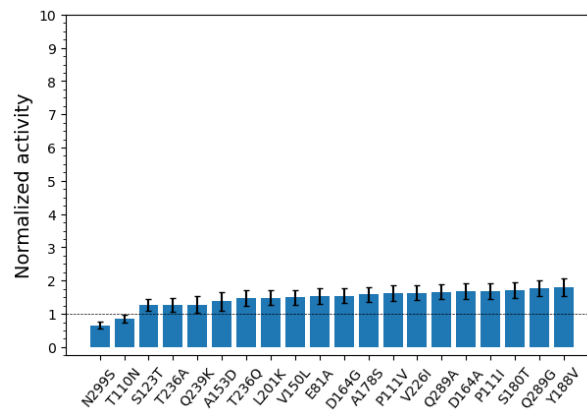

Figure 19: Normalized enzymatic activity of EVmutation-predicted single-substituted variants without thermal stress.

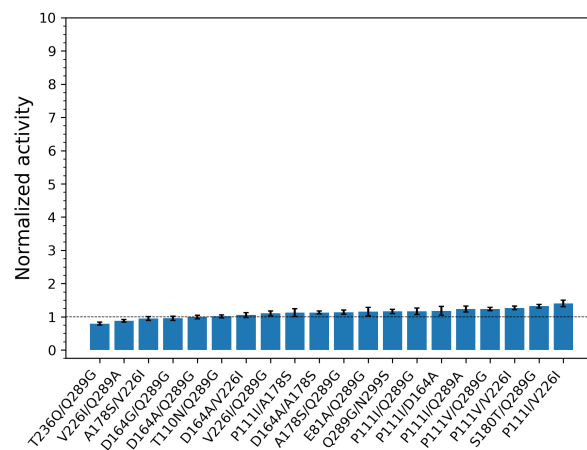

Figure 20: Normalized enzymatic activity of EVmutation-predicted double-substituted variants without thermal stress.

## 10. Enzymatic activity of predicted EGLII variants after thermal stress at 76 °C

In addition to incubation at 75 °C, all predicted EGLII variants were also subjected to thermal stress by incubation at 76 °C. Although the results at 76 °C were similar to those at 75 °C, the observed fold improvement was greater at elevated temperature.

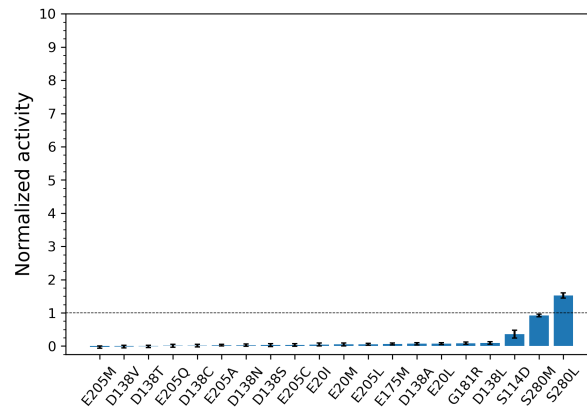

Figure 21: Normalized enzymatic activity of FoldX-predicted single-substituted variants after 1-hour incubation at 76 °C.

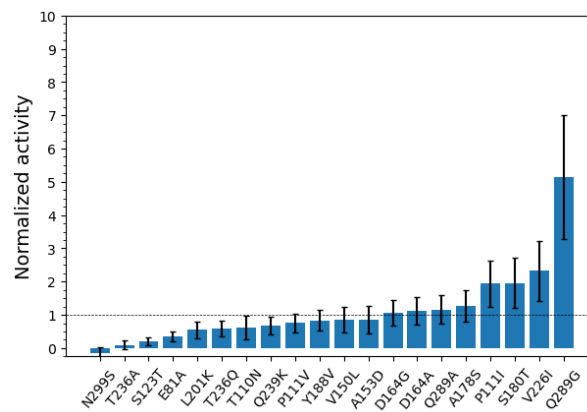

Figure 22: Normalized enzymatic activity of EVmutation-predicted single-substituted variants after 1-hour incubation at 76 °C.

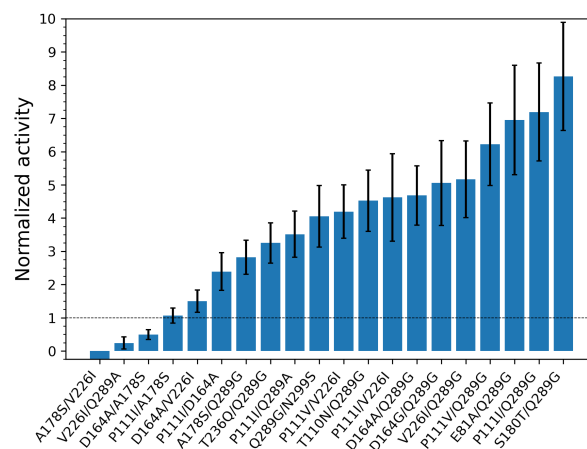

Figure 23: Normalized enzymatic activity of EVmutation-predicted double-substituted variants after 1-hour incubation at 76 °C.

## 11. Thermal unfolding curves of predicted EGLII variants from FoldX and EVmutation (single and double substituted)

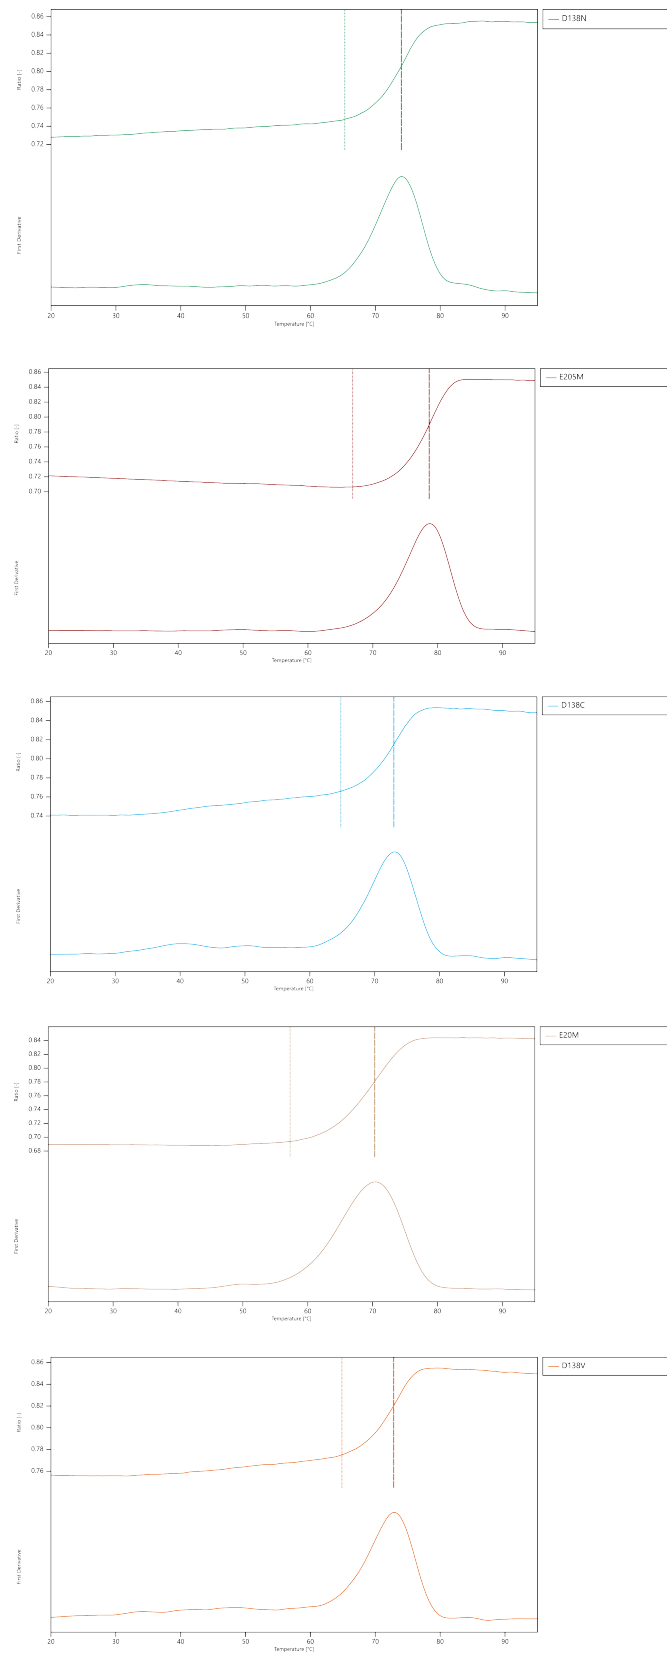

Figure 24: Thermal unfolding curves of FoldX single-substituted variants

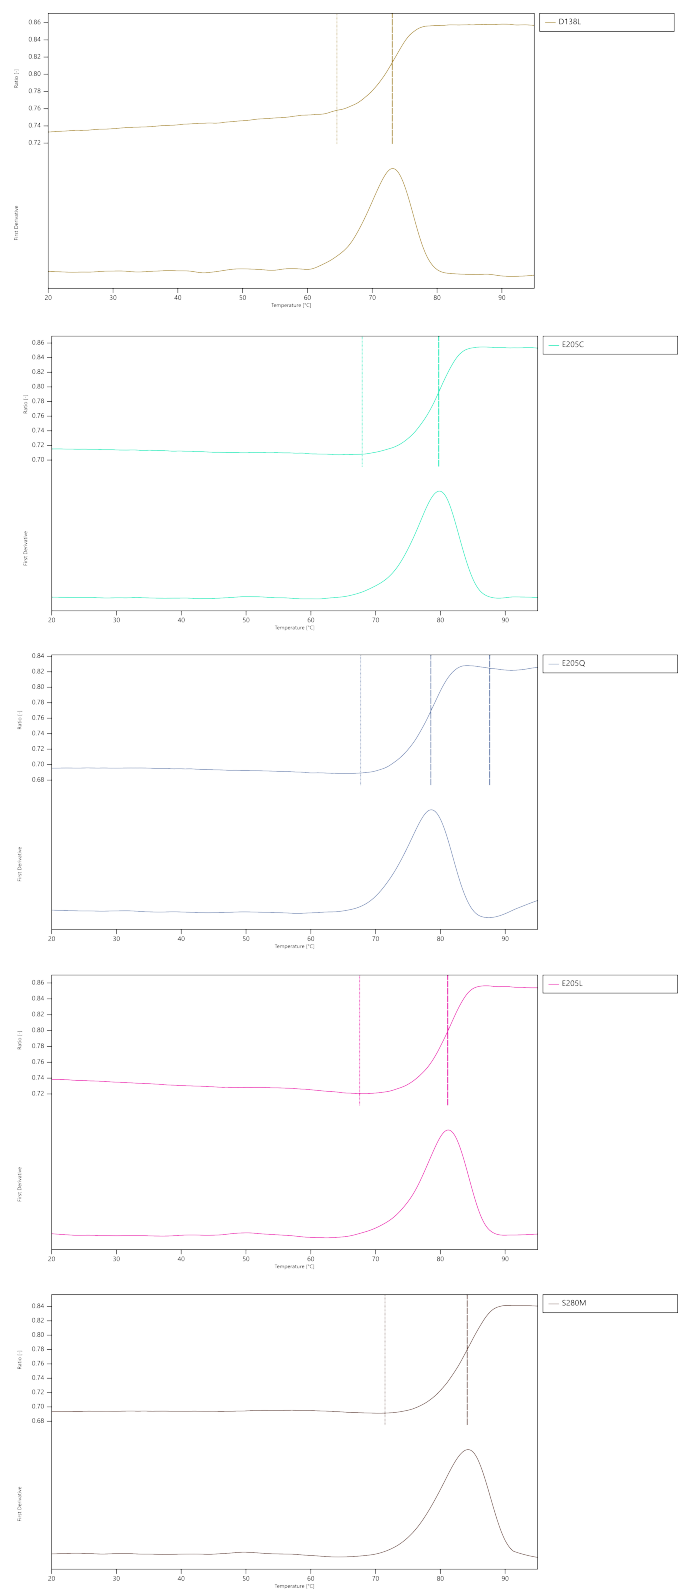

Figure 25: Thermal unfolding curves of FoldX single-substituted variants

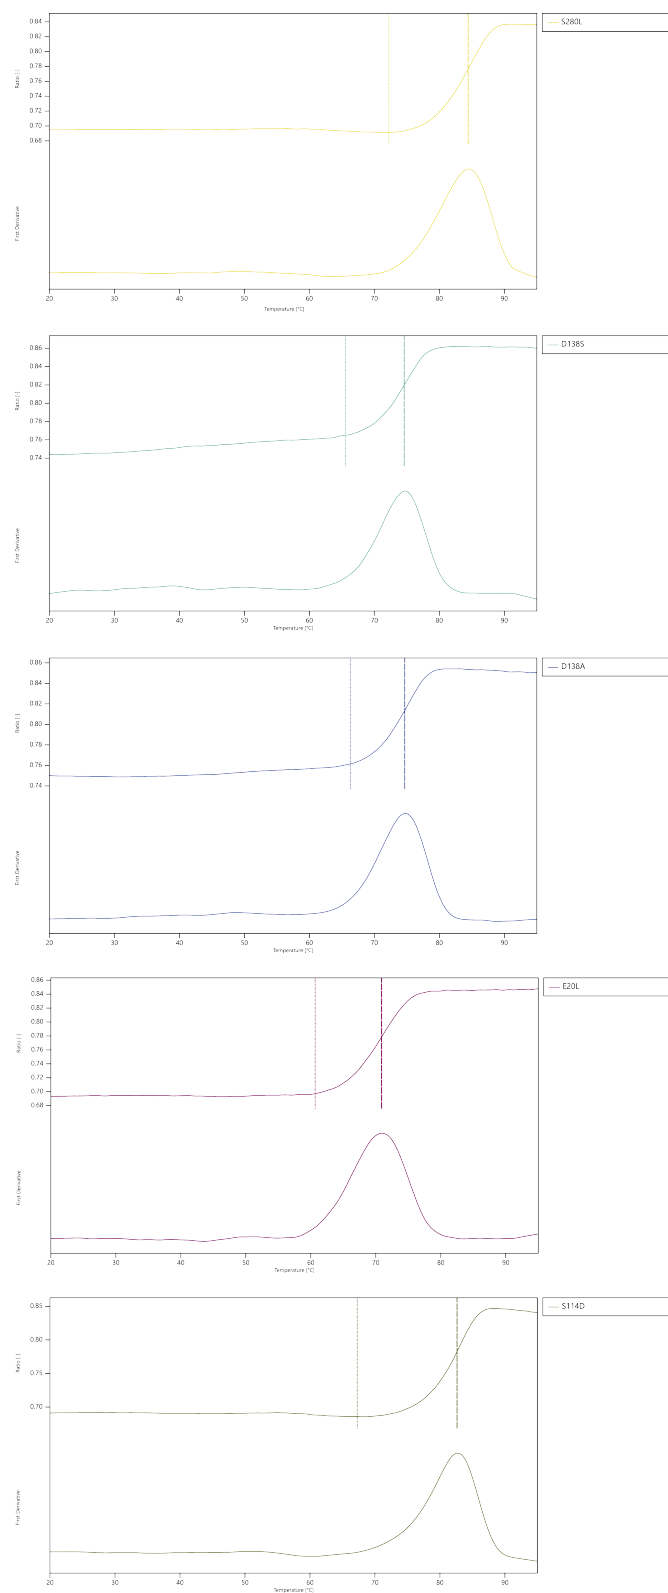

Figure 26: Thermal unfolding curves of FoldX single-substituted variants

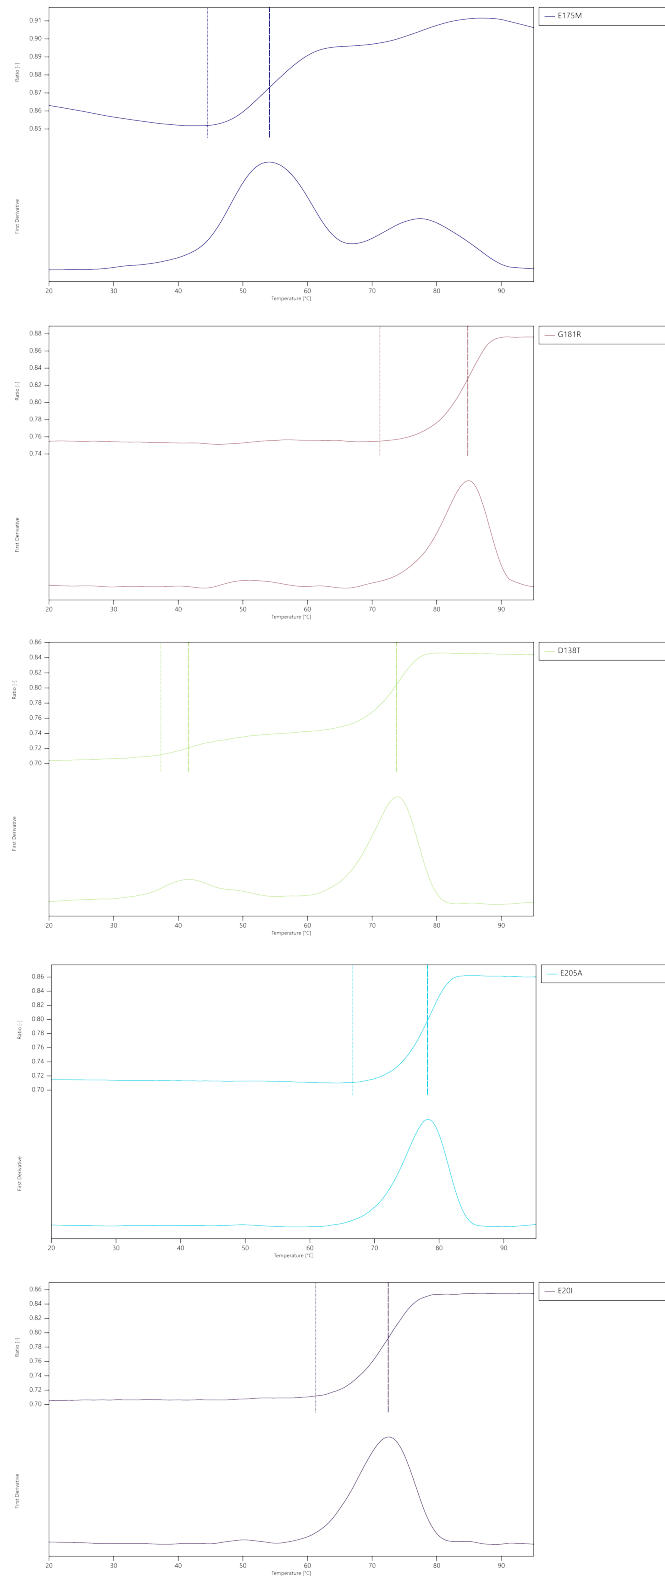

Figure 27: Thermal unfolding curves of FoldX single-substituted variants



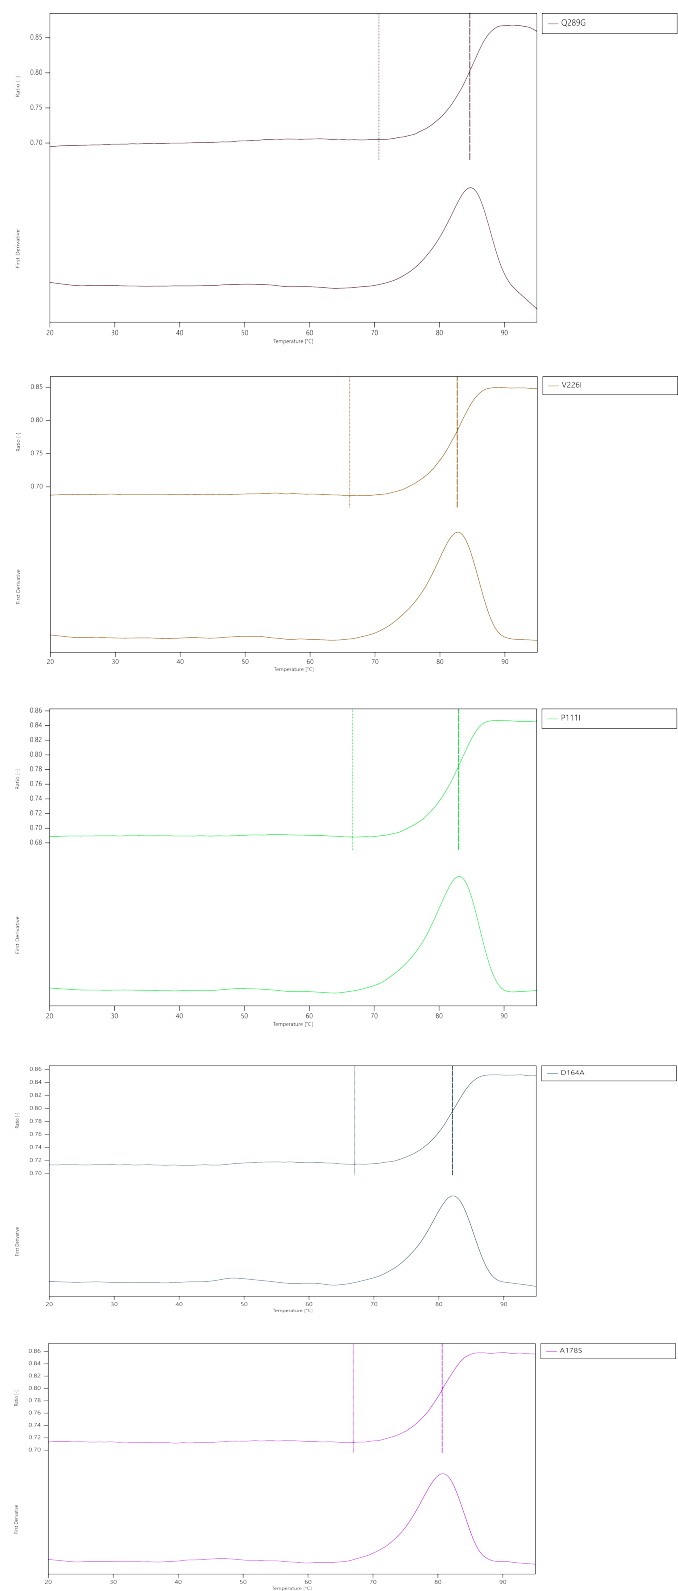

Figure 28: Thermal unfolding curves of EVmutation single-substituted variants

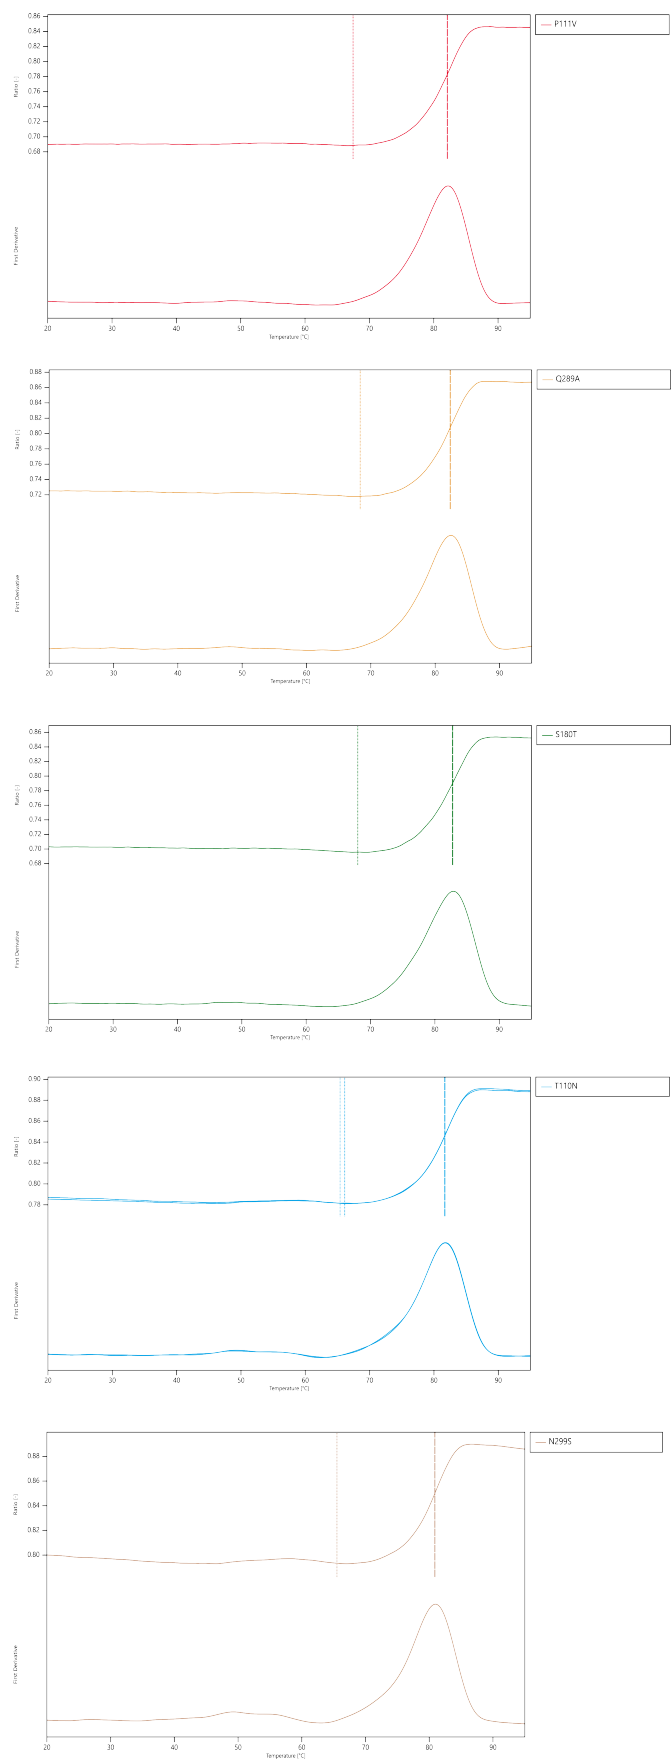

Figure 29: Thermal unfolding curves of EVmutation single-substituted variants

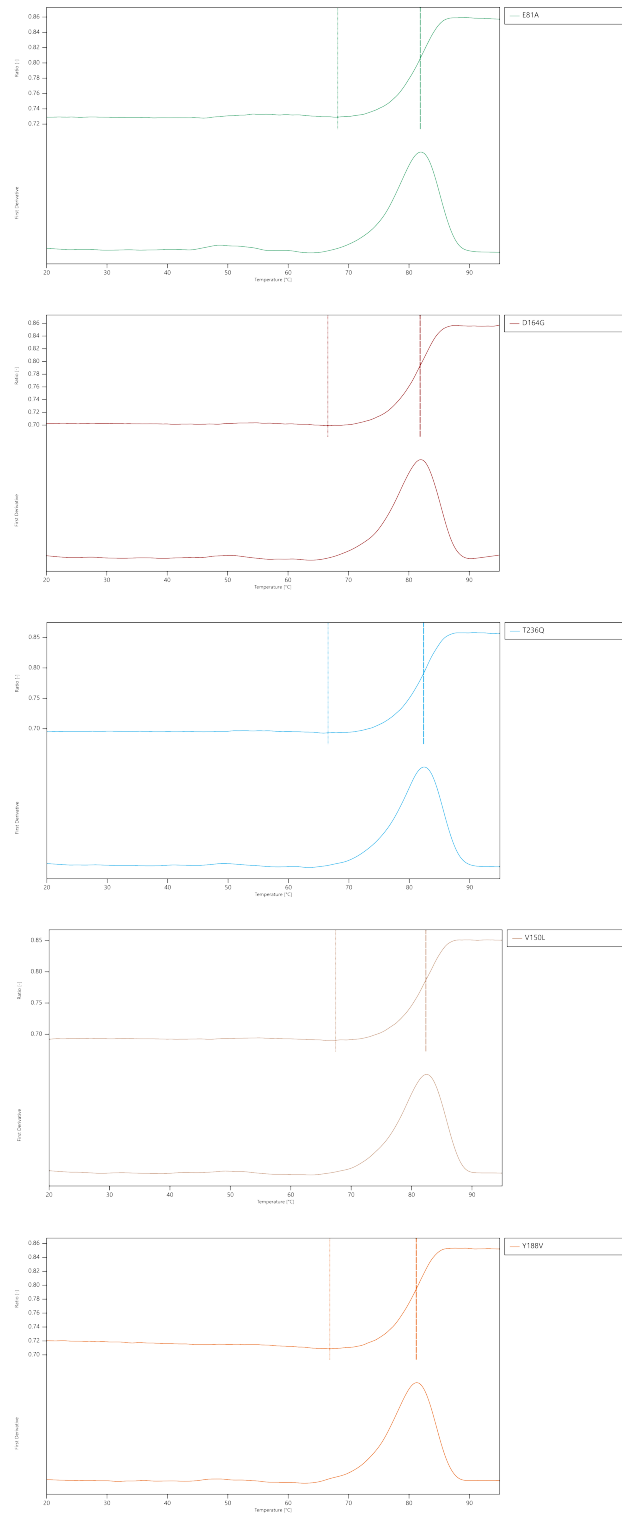

Figure 30: Thermal unfolding curves of EVmutation single-substituted variants

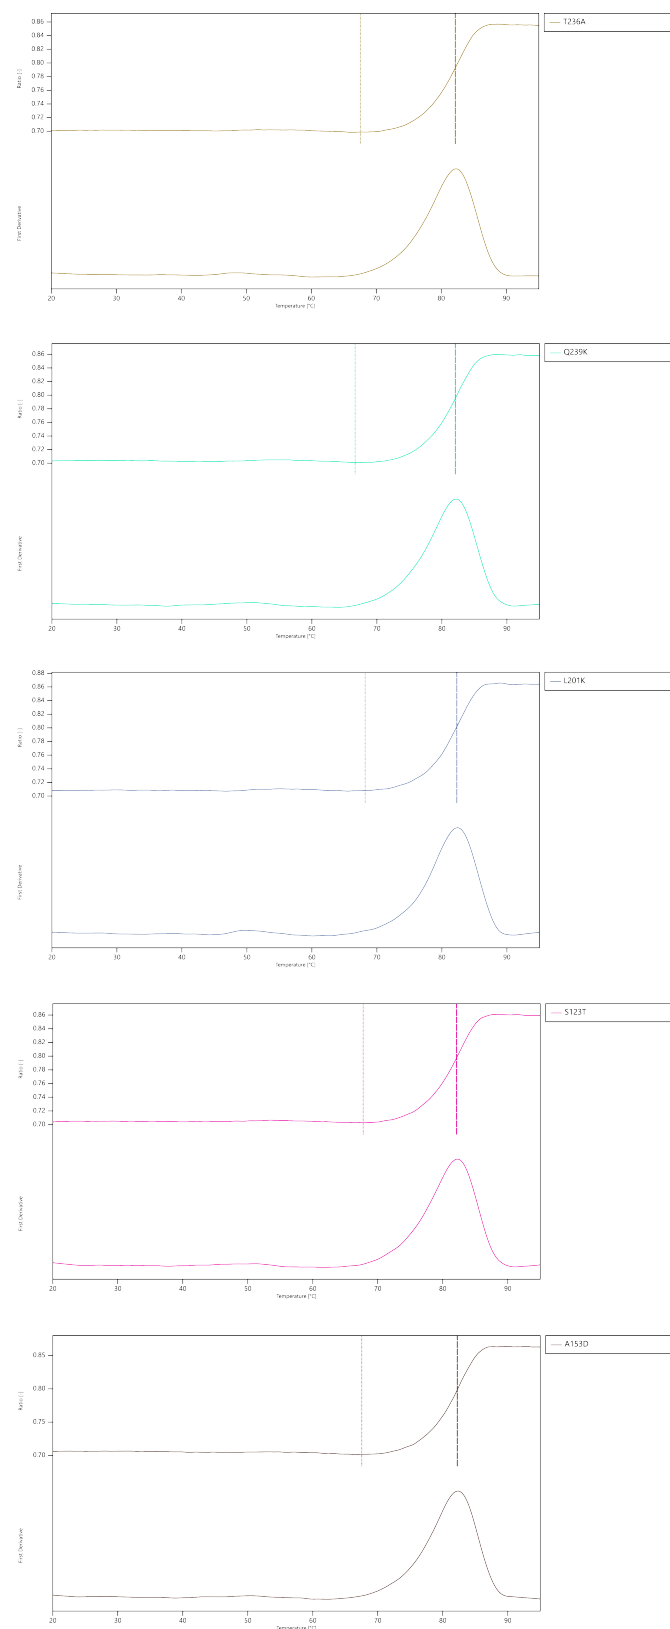

Figure 31: Thermal unfolding curves of EVmutation single-substituted variants

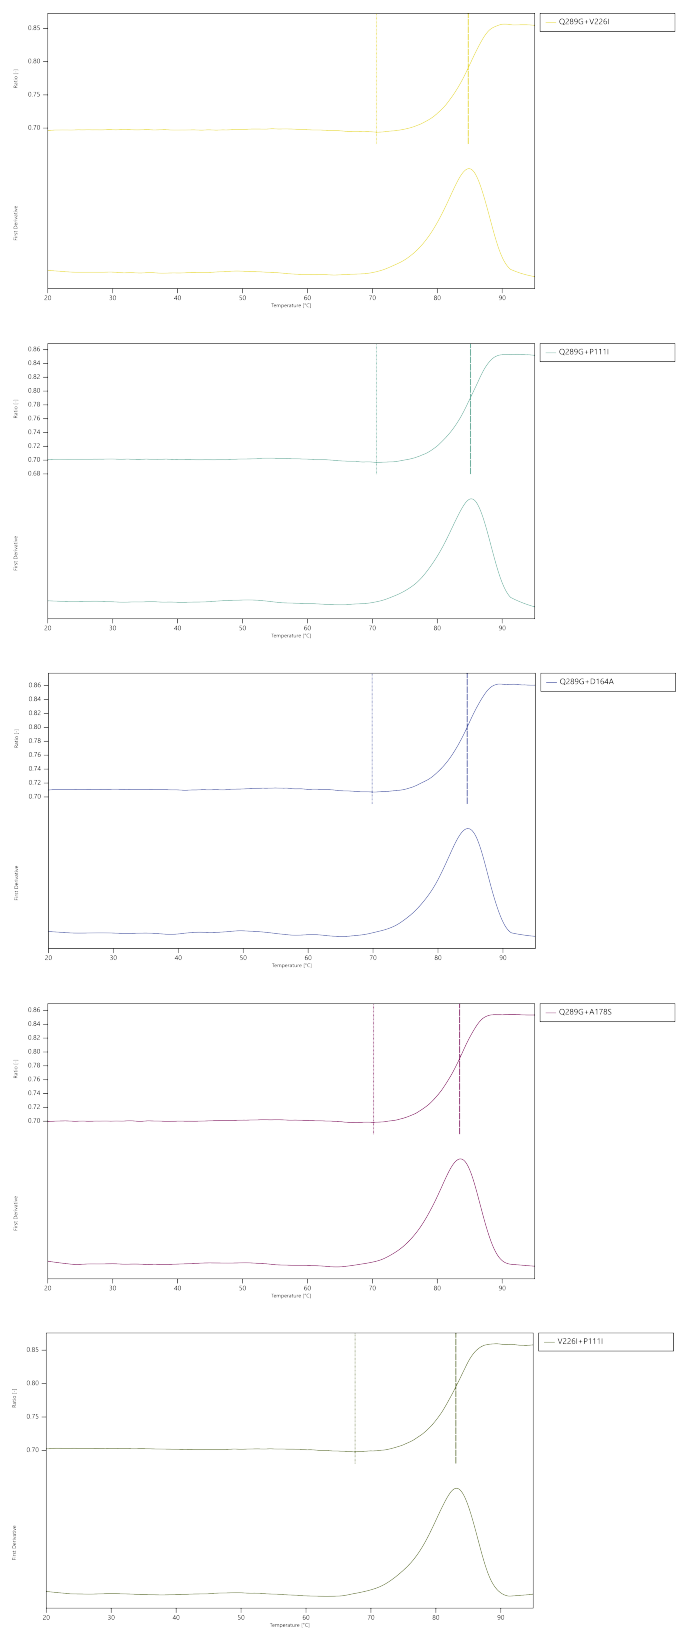

Figure 32: Thermal unfolding curves of EVmutation double-substituted variants

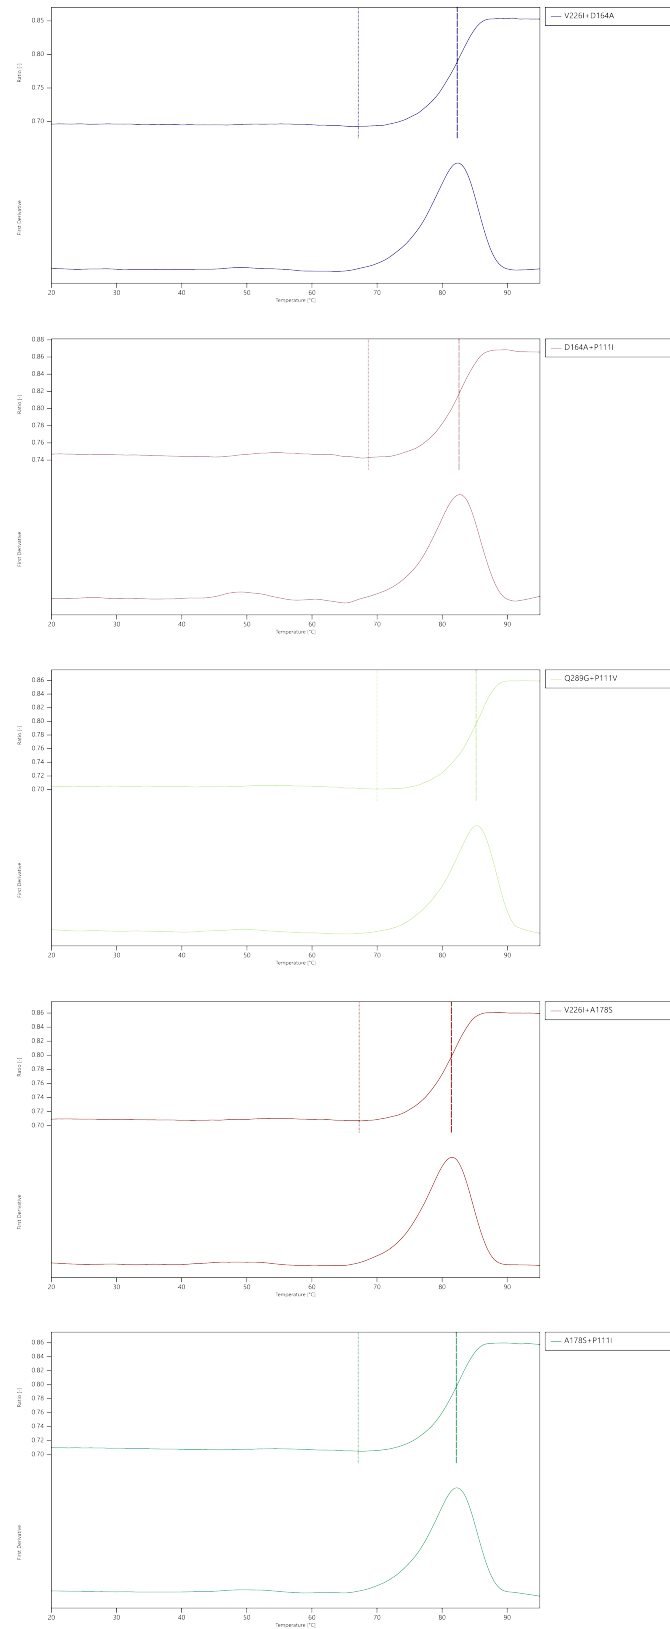

Figure 33: Thermal unfolding curves of EVmutation double-substituted variants

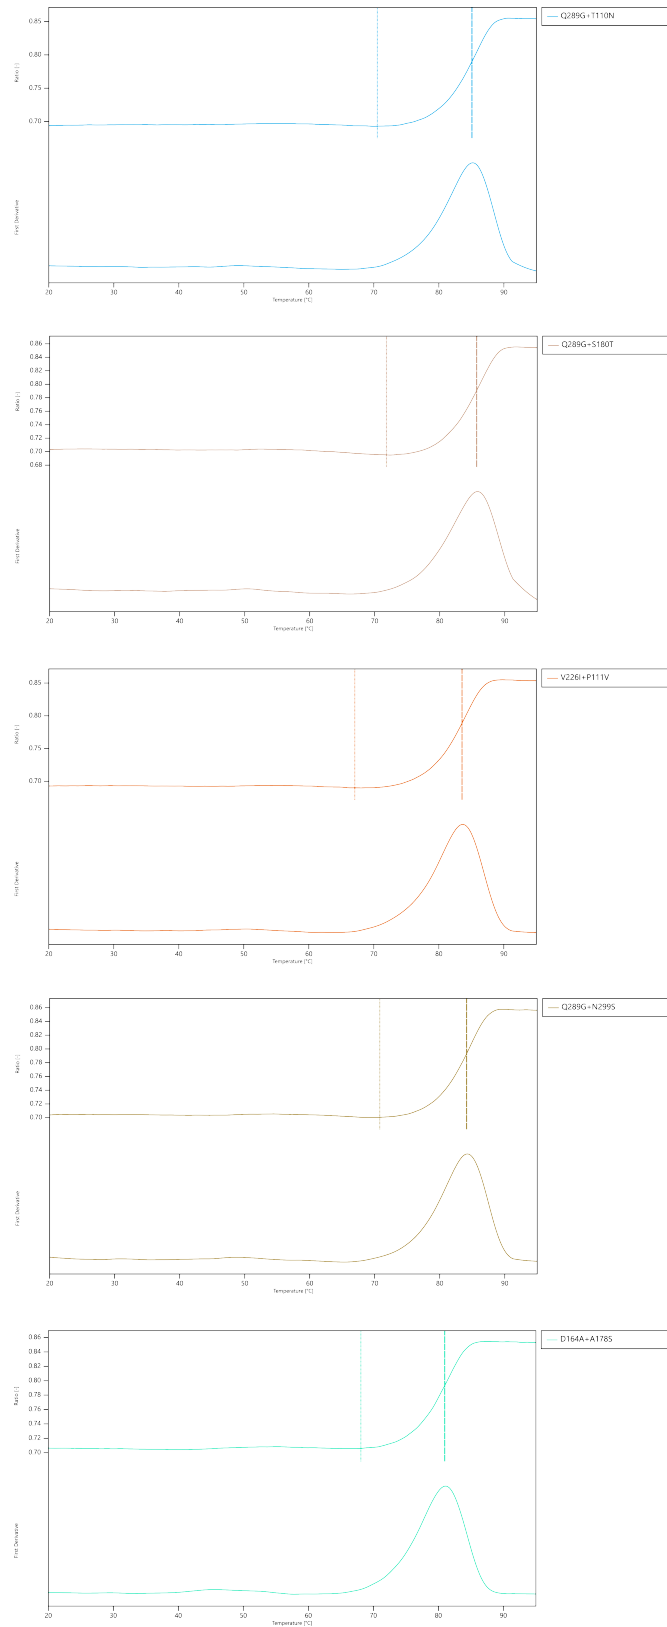

Figure 34: Thermal unfolding curves of EVmutation double-substituted variants

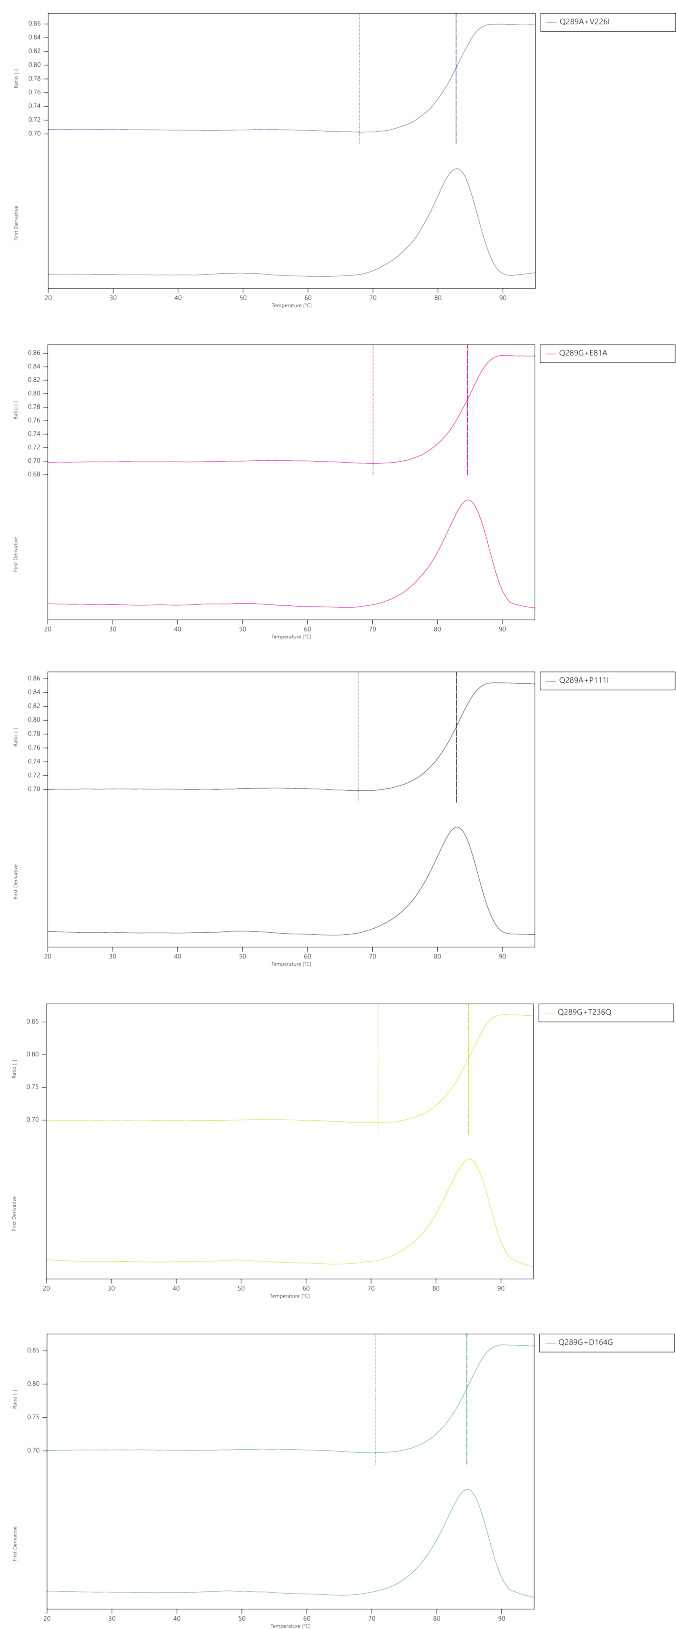

Figure 35: Thermal unfolding curves of EVmutation double-substituted variants



## 12. ConSurf analysis of predicted EGLII positions (FoldX and EVmutation)

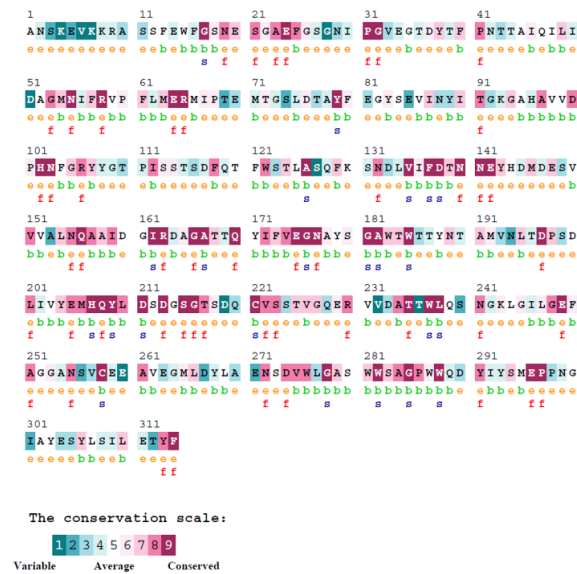

Figure 36: ConSurf analysis of EGLII

Table 8: Conservation and exposure of predicted EGLII positions

| Position | Method     | Residue | Conservation Score | Conservation Level | Exposure |
|----------|------------|---------|--------------------|--------------------|----------|
| 20       | FoldX      | E       | 7                  | Moderate           | Exposed  |
| 114      | FoldX      | S       | 6                  | Moderate           | Exposed  |
| 138      | FoldX      | D       | 9                  | High               | Buried   |
| 175      | FoldX      | E       | 9                  | High               | Exposed  |
| 181      | FoldX      | G       | 9                  | High               | Buried   |
| 205      | FoldX      | E       | 8                  | High               | Exposed  |
| 280      | FoldX      | S       | 5                  | Moderate           | Buried   |
| 81       | EVmutation | E       | 3                  | Low                | Exposed  |
| 110      | EVmutation | T       | 3                  | Low                | Exposed  |
| 111      | EVmutation | P       | 4                  | Low                | Exposed  |
| 123      | EVmutation | S       | 3                  | Low                | Exposed  |
| 150      | EVmutation | V       | 5                  | Moderate           | Buried   |
| 153      | EVmutation | A       | 2                  | Low                | Exposed  |
| 164      | EVmutation | D       | 4                  | Low                | Buried   |
| 178      | EVmutation | A       | 6                  | Moderate           | Buried   |
| 180      | EVmutation | S       | 6                  | Moderate           | Exposed  |
| 188      | EVmutation | Y       | 5                  | Moderate           | Buried   |
| 201      | EVmutation | L       | 8                  | High               | Exposed  |
| 226      | EVmutation | V       | 7                  | Moderate           | Buried   |
| 236      | EVmutation | T       | 1                  | Low                | Exposed  |
| 239      | EVmutation | Q       | 5                  | Moderate           | Exposed  |
| 289      | EVmutation | Q       | 4                  | Low                | Buried   |
| 299      | EVmutation | N       | 4                  | Low                | Exposed  |

### 13. References

- [1] H. Nakazawa, K. Okada, T. Onodera, W. Ogasawara, H. Okada, Y. Morikawa, Directed evolution of endoglucanase iii (cel12a) from *trichoderma reesei*, *Applied microbiology and biotechnology* 83 (2009) 649–657.
- [2] M. Anbar, R. Lamed, E. A. Bayer, Thermostability enhancement of *clostridium thermocellum* cellulosomal endoglucanase cel8a by a single glycine substitution, *ChemCatChem* 2 (2010) 997–1003.
- [3] X.-J. Wang, Y.-J. Peng, L.-Q. Zhang, A.-N. Li, D.-C. Li, Directed evolution and structural prediction of cellobiohydrolase ii from the thermophilic fungus *chaetomium thermophilum*, *Applied microbiology and biotechnology* 95 (2012) 1469–1478.
- [4] I. Wu, F. H. Arnold, Engineered thermostable fungal cel6a and cel7a cellobiohydrolases hydrolyze cellulose efficiently at elevated temperatures, *Biotechnology and Bioengineering* 110 (2013) 1874–1883.
- [5] L. Cao, S. Li, X. Huang, Z. Qin, W. Kong, W. Xie, Y. Liu, Enhancing the thermostability of highly active and glucose-tolerant  $\beta$ -glucosidase ks5a7 by directed evolution for good performance of three properties, *Journal of agricultural and food chemistry* 66 (2018) 13228–13235.
- [6] S. Yoav, J. Stern, O. Salama-Alber, F. Frolov, M. Anbar, A. Karpol, Y. Hadar, E. Morag, E. A. Bayer, Directed evolution of *clostridium thermocellum*  $\beta$ -glucosidase a towards enhanced thermostability, *International Journal of Molecular Sciences* 20 (2019) 4701.
- [7] S. P. Voutilainen, H. Boer, M. Alapuranen, J. Jänis, J. Vehmaanperä, A. Koivula, Improving the thermostability and activity of *melanocarpus albomyces* cellobiohydrolase cel7b, *Applied microbiology and biotechnology* 83 (2009) 261–272.
- [8] J. Zhang, H. Shi, L. Xu, X. Zhu, X. Li, Site-directed mutagenesis of a hyperthermophilic endoglucanase cel12b from *thermotoga maritima* based on rational design, *PLoS One* 10 (2015) e0133824.
- [9] X. Chen, W. Li, P. Ji, Y. Zhao, C. Hua, C. Han, Engineering the conserved and noncatalytic residues of a thermostable  $\beta$ -1, 4-endoglucanase to improve specific activity and thermostability, *Scientific reports* 8 (2018) 2954.
- [10] C. Han, Q. Wang, Y. Sun, R. Yang, M. Liu, S. Wang, Y. Liu, L. Zhou, D. Li, Improvement of the catalytic activity and thermostability of a hyperthermostable endoglucanase by optimizing n-glycosylation sites, *Biotechnology for biofuels* 13 (2020) 1–11.
- [11] C. Han, Y. Liu, M. Liu, S. Wang, Q. Wang, Improving the thermostability of a thermostable endoglucanase from *chaetomium thermophilum* by engineering the conserved noncatalytic residue and n-glycosylation site, *International Journal of Biological Macromolecules* 164 (2020) 3361–3368.
- [12] A. Bashirova, S. Pramanik, P. Volkov, A. Rozhkova, V. Nemashkalov, I. Zorov, A. Gusakov, A. Sinitsyn, U. Schwaneberg, M. D. Davari, Disulfide bond engineering of an endoglucanase from *penicillium verruculosum* to improve its thermostability, *International Journal of Molecular Sciences* 20 (2019) 1602.
- [13] A. S. Dotsenko, S. Pramanik, A. V. Gusakov, A. M. Rozhkova, I. N. Zorov, A. P. Sinitsyn, M. D. Davari, U. Schwaneberg, Critical effect of proline on thermostability of endoglucanase ii from *penicillium verruculosum*, *Biochemical engineering journal* 152 (2019) 107395.
- [14] A. S. Dotsenko, G. S. Dotsenko, A. M. Rozhkova, I. N. Zorov, A. P. Sinitsyn, Rational design and structure insights for thermostability improvement of *penicillium verruculosum* cel7a cellobiohydrolase, *Biochimie* 176 (2020) 103–109.
- [15] C. M. Dana, P. Saija, S. M. Kal, M. B. Bryan, H. W. Blanch, D. S. Clark, Biased clique shuffling reveals stabilizing mutations in cellulase cel7a, *Biotechnology and bioengineering* 109 (2012) 2710–2719.
- [16] Y. Ito, A. Ikeuchi, C. Imamura, Advanced evolutionary molecular engineering to produce thermostable cellulase by using a small but efficient library, *Protein Engineering, Design & Selection* 26 (2013) 73–79.
- [17] A. Mitrovic, K. Flicker, G. Steinkellner, K. Gruber, C. Reisinger, G. Schirmacher, A. Camattari, A. Glieder, Thermostability improvement of endoglucanase cel7b from *hypocrea pseudokoningii*, *Journal of Molecular Catalysis B: Enzymatic* 103 (2014) 16–23.
- [18] C.-J. Chang, C.-C. Lee, Y.-T. Chan, D. L. Trudeau, M.-H. Wu, C.-H. Tsai, S.-M. Yu, T.-H. D. Ho, A. H.-J. Wang, C.-D. Hsiao, et al., Exploring the mechanism responsible for cellulase thermostability by structure-guided recombination, *PLoS One* 11 (2016) e0147485.
- [19] F. Goedegebuur, L. Dankmeyer, P. Gualfetti, S. Karkehabadi, H. Hansson, S. Jana, V. Huynh, B. R. Kelemen, P. Kruihof, E. A. Larenas, et al., Improving the thermal stability of cellobiohydrolase cel7a from *hypocrea jecorina* by directed evolution, *Journal of Biological Chemistry* 292 (2017) 17418–17430.
- [20] F. Zheng, J. V. Vermaas, J. Zheng, Y. Wang, T. Tu, X. Wang, X. Xie, B. Yao, G. T. Beckham, H. Luo, Activity and thermostability of gh5 endoglucanase chimeras from mesophilic and thermophilic parents, *Applied and environmental microbiology* 85 (2019) e02079–18.
- [21] F. Contreras, M. J. Thiele, S. Pramanik, A. M. Rozhkova, A. S. Dotsenko, I. N. Zorov, A. P. Sinitsyn, M. D. Davari, U. Schwaneberg, Knowvolution of a gh5 cellulase from *penicillium verruculosum* to improve thermal stability for biomass degradation, *ACS Sustainable Chemistry & Engineering* 8 (2020) 12388–12399.
- [22] F. Contreras, C. Nutschel, L. Beust, M. D. Davari, H. Gohlke, U. Schwaneberg, Can constraint network analysis guide the identification phase of knowvolution? a case study on improved thermostability of an endo- $\beta$ -glucanase, *Computational and structural biotechnology journal* 19 (2021) 743–751.
- [23] W. Wang, B. A. Malcolm, Two-stage pcr protocol allowing introduction of multiple mutations, deletions and insertions using quikchangetm site-directed mutagenesis, *Biotechniques* 26 (1999) 680–682.
- [24] S. R. Eddy, Accelerated profile hmm searches, *PLoS computational biology* 7 (2011) e1002195.
- [25] Uniprot: the universal protein knowledgebase in 2023, *Nucleic acids research* 51 (2023) D523–D531.
- [26] A. Bateman, M.-J. Martin, S. Orchard, M. Magrane, S. Ahmad, E. Alpi, E. H. Bowler-Barnett, R. Britto, H. Bye-A-Jee, A. Cukura, P. Denny, T. Dogan, T. Ebenezer, J. Fan, P. Garmiri, L. J. da Costa Gonzales, E. Hatton-Ellis, A. Hussein, A. Ignatchenko, G. Insana, R. Ishtiaq, V. Joshi, D. Jyothi, S. Kandasamy, A. Lock, A. Luciani, M. Lugaric, J. Luo, Y. Lussi, A. MacDougall, F. Madeira, M. Mahmoudy, A. Mishra, K. Moulang, A. Nightingale, S. Pundir, G. Qi, S. Raj, P. Raposo, D. L. Rice, R. Saidi, R. Santos, E. Speretta, J. Stephenson, P. Tootoo, E. Turner, N. Tyagi, P. Vasudev, K. Warner, X. Watkins, R. Zaru, H. Zellner, A. J. Bridge, L. Aimo, G. Argoud-Puy, A. H. Auchincloss, K. B. Axelsen, P. Bansal, D. Baratin, T. M. Batista Neto, M.-C. Blatter, J. T. Bolleman, E. Boutet, L. Breuza, B. C. Gil, C. Casals-Casas, K. C. Echioukh, E. Coudert, B. Cuhe, E. de Castro, A. Estreicher, M. L. Famiglietti, M. Feuermann, E. Gasteiger, P. Gaudet, S. Gehant, V. Gerritsen, A. Gos, N. Gruaz, C. Hulo, N. Hyka-Nouspikel, F. Jungo, A. Kerhornou, P. Le Mercier, D. Lieberherr, P. Masson, A. Morgat, V. Muthukrishnan, S. Paesano, I. Pedruzzi, S. Pilbout, L. Pourcel, S. Poux, M. Pozzato, M. Pruess, N. Redaschi, C. Rivoire, C. J. A. Sigrist, K. Sonesson, S. Sundaram, C. H. Wu, C. N. Arighi, L. Arminski, C. Chen, Y. Chen, H. Huang, K. Laiho, P. McGarvey, D. A. Natale, K. Ross, C. R. Vinayaka, Q. Wang, Y. Wang, J. Zhang, Uniprot: the universal protein knowledgebase in 2023, *Nucleic Acids Research* 51 (2022) D523–D531. URL: <http://dx.doi.org/10.1093/nar/gkac1052>. doi:10.1093/nar/gkac1052.
- [27] T. A. Hopf, J. B. Ingraham, F. J. Poelwijk, C. P. Schärfe, M. Springer, C. Sander, D. S. Marks, Mutation effects predicted from sequence co-variation, *Nature biotechnology* 35 (2017) 128–135.

- [28] V. J. Frauenkron-Machedjou, A. Fulton, L. Zhu, C. Anker, M. Bocola, K.-E. Jaeger, U. Schwaneberg, Towards understanding directed evolution: more than half of all amino acid positions contribute to ionic liquid resistance of bacillus subtilis lipase a, *ChemBioChem* 16 (2015) 937–945.
